# Supplementary material
Source: HighWire-hosted journal article supplement (https://thorax.bmj.com/content/75/1/8)
Supplement: inline-supplementary-material-7 [file inline-supplementary-material-7.xlsx]

## Sheet: BEAT
Assay	Sample	Ct	Tm	Efficiency	flag		Assay	Sample	Ct	Tm	Efficiency	flag		Assay	Sample	Ct	Tm	Efficiency	flag		Assay	Sample	Ct	Tm	Efficiency	flag		Assay	Sample	Ct	Tm	Efficiency	flag		Assay	Sample	Ct	Tm	Efficiency	flag		Assay	Sample	Ct	Tm	Efficiency	flag		Assay
16S rRNA	1A	16.15	81.31	2.01			16S rRNA	1B	18.6	81.86	1.84	SaturationBaselineRatioIsLow		16S rRNA	1C	11.29	81.86	1.92	SaturationBaselineRatioIsLow		16S rRNA	2A	17.48	81.79	2.05			16S rRNA	2B	15.12	81.93	2.05			16S rRNA	2C	18.58	82.22	2.01			16S rRNA	3A	16.74	81.87	2.05			16S rRNA
aac	1A	30.41	82.04	1.96	MultipleMeltPeaks		aac	1B	29.36	81.11	1.79	LowEfficiency, SaturationBaselineRatioIsLow, MultipleMeltPeaks		aac	1C	31.48	83.81	1.66	LowEfficiency, CtIsLarge, MultipleMeltPeaks		aac	2A	28.14	85.98	1.78	MultipleMeltPeaks		aac	2B	29.47	81.67	1.92	SaturationBaselineRatioIsLow, MultipleMeltPeaks		aac	2C	32.87	80.86	1.73	MultipleMeltPeaks		aac	3A	29.68	80.81	1.87	MultipleMeltPeaks		aac
aac(6')-Ib(aka aacA4)-01	1A				CurveFitFailed		aac(6')-Ib(aka aacA4)-01	1B				LowEfficiency, CtIsSmall, SaturationBaselineRatioIsLow, CurveFitFailed, HighBaseline		aac(6')-Ib(aka aacA4)-01	1C	33.4	80.46	1.92	CtIsLarge		aac(6')-Ib(aka aacA4)-01	2A				NoAmplification		aac(6')-Ib(aka aacA4)-01	2B				LowEfficiency, CtIsSmall, CurveFitFailed, HighBaseline		aac(6')-Ib(aka aacA4)-01	2C				NoAmplification		aac(6')-Ib(aka aacA4)-01	3A				CurveFitFailed		aac(6')-Ib(aka aacA4)-01
aac(6')-Ib(aka aacA4)-02	1A	29.05	82.35	1.93			aac(6')-Ib(aka aacA4)-02	1B	30.84	85.14	1.97	CtIsLarge, SaturationBaselineRatioIsLow		aac(6')-Ib(aka aacA4)-02	1C	30.7	85.99	1.96	CtIsLarge		aac(6')-Ib(aka aacA4)-02	2A	29.39	87.09	2			aac(6')-Ib(aka aacA4)-02	2B	30.95	81.73	1.98	CtIsLarge, MultipleMeltPeaks		aac(6')-Ib(aka aacA4)-02	2C	34.08	79.96	1.9	MultipleMeltPeaks		aac(6')-Ib(aka aacA4)-02	3A	30.18	89.24	1.95			aac(6')-Ib(aka aacA4)-02
aac(6')-Ib(aka aacA4)-03	1A	40.23	79.51	1.69	MultipleMeltPeaks		aac(6')-Ib(aka aacA4)-03	1B				LowEfficiency, CtIsSmall, SaturationBaselineRatioIsLow, CurveFitFailed		aac(6')-Ib(aka aacA4)-03	1C	32.18	78.02	2.01	CtIsLarge		aac(6')-Ib(aka aacA4)-03	2A	30.69	90.41	2			aac(6')-Ib(aka aacA4)-03	2B	31.18	78.03	2.04	CtIsLarge, MultipleMeltPeaks		aac(6')-Ib(aka aacA4)-03	2C				CurveFitFailed		aac(6')-Ib(aka aacA4)-03	3A	31.36	76.15	2	MultipleMeltPeaks		aac(6')-Ib(aka aacA4)-03
aac(6')-II	1A	32.62	83.96	1.76	MultipleMeltPeaks		aac(6')-II	1B	33.01	84.01	1.83	CtIsLarge, SaturationBaselineRatioIsLow, MultipleMeltPeaks		aac(6')-II	1C	33.66	90.02	1.83	CtIsLarge, MultipleMeltPeaks		aac(6')-II	2A	32.43	81.09	1.66	MultipleMeltPeaks		aac(6')-II	2B	33.3	85.42	1.84	CtIsLarge, SaturationBaselineRatioIsLow, MultipleMeltPeaks		aac(6')-II	2C	38.22	83.52	1.59	MultipleMeltPeaks		aac(6')-II	3A	31.47	85.47	1.81			aac(6')-II
aac(6')I1	1A				CurveFitFailed		aac(6')I1	1B				LowEfficiency, CtIsSmall, CurveFitFailed, HighBaseline		aac(6')I1	1C				LowEfficiency, CtIsLarge, CurveFitFailed		aac(6')I1	2A	35.61	88.61	1.8			aac(6')I1	2B	33.2	90.88	1.78	LowEfficiency, CtIsLarge, MultipleMeltPeaks		aac(6')I1	2C				NoAmplification		aac(6')I1	3A	36.47	88.73	1.78			aac(6')I1
aacA/aphD	1A				CurveFitFailed		aacA/aphD	1B				LowEfficiency, CtIsSmall, SaturationBaselineRatioIsLow, CurveFitFailed, HighBaseline		aacA/aphD	1C				NoAmplification		aacA/aphD	2A				NoAmplification		aacA/aphD	2B				CurveFitFailed		aacA/aphD	2C				NoAmplification		aacA/aphD	3A				BadR2, LowEfficiency, CtIsSmall, CurveFitFailed, HighBaseline		aacA/aphD
aacC	1A	30.21	88.47	1.78	MultipleMeltPeaks		aacC	1B	31.79	91.86	1.93	CtIsLarge, SaturationBaselineRatioIsLow, MultipleMeltPeaks		aacC	1C	29.17	88.73	1.57	LowEfficiency, SaturationBaselineRatioIsLow		aacC	2A	30.73	92.1	1.85			aacC	2B	28.61	88.39	2.17	SaturationBaselineRatioIsLow, MultipleMeltPeaks		aacC	2C	32.79	81.23	1.71	MultipleMeltPeaks		aacC	3A	32.44	87.68	1.91	MultipleMeltPeaks		aacC
aacC1	1A				NoAmplification		aacC1	1B				NoAmplification		aacC1	1C				CtIsLarge, CurveFitFailed		aacC1	2A	36.13	92.26	1.82	MultipleMeltPeaks		aacC1	2B				NoAmplification		aacC1	2C				NoAmplification		aacC1	3A	31.76	92.32	1.87			aacC1
aacC2	1A				NoAmplification		aacC2	1B				CurveFitFailed		aacC2	1C				NoAmplification		aacC2	2A				NoAmplification		aacC2	2B				NoAmplification		aacC2	2C				NoAmplification		aacC2	3A	39.06	78.17	1.75	MultipleMeltPeaks		aacC2
aacC4	1A	32.64	83.49	1.94	MultipleMeltPeaks		aacC4	1B	34.86	83.56	1.87	CtIsLarge, SaturationBaselineRatioIsLow, MultipleMeltPeaks		aacC4	1C	32.55	91.43	1.95	CtIsLarge, SaturationBaselineRatioIsLow, MultipleMeltPeaks		aacC4	2A	32.08	83.68	1.85	MultipleMeltPeaks		aacC4	2B	29.69	89.92	1.97	CtIsLarge, SaturationBaselineRatioIsLow		aacC4	2C				NoAmplification		aacC4	3A	31.72	83.65	1.9	MultipleMeltPeaks		aacC4
aadA-01	1A				NoAmplification		aadA-01	1B				LowEfficiency, CtIsSmall, CurveFitFailed, HighBaseline		aadA-01	1C	28.76	81.81	1.92			aadA-01	2A	33.32	82.42	1.95			aadA-01	2B				BadR2, LowEfficiency, CtIsSmall, SaturationBaselineRatioIsLow, CurveFitFailed, HighBaseline		aadA-01	2C				NoAmplification		aadA-01	3A	38.91	85.07	1.78	MultipleMeltPeaks		aadA-01
aadA-02	1A	36.11	80.51	1.9			aadA-02	1B				CurveFitFailed		aadA-02	1C	32.95	80.4	1.95	CtIsLarge		aadA-02	2A				NoAmplification		aadA-02	2B	34.73	80.38	1.92	CtIsLarge		aadA-02	2C	37.37	80.64	1.87			aadA-02	3A	34.36	80.46	1.94			aadA-02
aadA-1-01	1A	35.32	85.57	1.84			aadA-1-01	1B	34	81.09	1.86	CtIsLarge, SaturationBaselineRatioIsLow, MultipleMeltPeaks		aadA-1-01	1C	33.64	81.27	1.86	CtIsLarge		aadA-1-01	2A	32.55	86.42	1.87			aadA-1-01	2B				CtIsLarge, CurveFitFailed		aadA-1-01	2C				NoAmplification		aadA-1-01	3A	33.32	81.72	1.92			aadA-1-01
aadA-1-02	1A				CurveFitFailed		aadA-1-02	1B	34.17	71.8	2.01	CtIsLarge, SaturationBaselineRatioIsLow		aadA-1-02	1C				BadR2, LowEfficiency, CtIsSmall, CurveFitFailed, HighBaseline		aadA-1-02	2A				NoAmplification		aadA-1-02	2B				LowEfficiency, CtIsSmall, CurveFitFailed, HighBaseline		aadA-1-02	2C				NoAmplification		aadA-1-02	3A				BadR2, LowEfficiency, CtIsSmall, CurveFitFailed, HighBaseline		aadA-1-02
aadA1	1A	34.23	83.23	1.92			aadA1	1B	29.91	84.47	2.05	CtIsLarge		aadA1	1C	29.06	79.01	2.02	MultipleMeltPeaks		aadA1	2A	28.01	82.77	2.03	MultipleMeltPeaks		aadA1	2B	33.43	83.93	2.01	CtIsLarge		aadA1	2C	37.78	83.47	1.78			aadA1	3A	33.1	83.71	2.01			aadA1
aadA2-01	1A				CurveFitFailed		aadA2-01	1B				LowEfficiency, CtIsSmall, CurveFitFailed, HighBaseline		aadA2-01	1C	34.58	76.77	1.89	CtIsLarge, MultipleMeltPeaks		aadA2-01	2A	29.38	80.9	1.82			aadA2-01	2B	33.96	91.06	1.83	CtIsLarge		aadA2-01	2C				NoAmplification		aadA2-01	3A	36.84	87.13	1.68	MultipleMeltPeaks		aadA2-01
aadA2-02	1A	31.19	75.54	2.03			aadA2-02	1B	29.2	75.44	1.94	SaturationBaselineRatioIsLow		aadA2-02	1C	31.84	75.24	1.95	CtIsLarge, SaturationBaselineRatioIsLow		aadA2-02	2A	29.81	75.24	2.01	MultipleMeltPeaks		aadA2-02	2B	30.63	75.24	1.92	CtIsLarge, SaturationBaselineRatioIsLow		aadA2-02	2C	31.31	75.53	1.99			aadA2-02	3A	31.89	75.48	2.01			aadA2-02
aadA2-03	1A				LowEfficiency, CtIsSmall, CurveFitFailed, HighBaseline		aadA2-03	1B				CurveFitFailed		aadA2-03	1C	29.87	80.21	1.96	CtIsLarge		aadA2-03	2A				NoAmplification		aadA2-03	2B				LowEfficiency, CtIsLarge, CurveFitFailed		aadA2-03	2C				CurveFitFailed		aadA2-03	3A				LowEfficiency, CtIsSmall, CurveFitFailed, HighBaseline		aadA2-03
aadA5-01	1A	38	81.13	1.7			aadA5-01	1B	31.05	84.42	1.91	CtIsLarge, SaturationBaselineRatioIsLow		aadA5-01	1C	33.82	88.34	1.86	CtIsLarge		aadA5-01	2A	32.06	78.38	1.87	MultipleMeltPeaks		aadA5-01	2B	34.78	88.4	1.85	CtIsLarge, SaturationBaselineRatioIsLow, MultipleMeltPeaks		aadA5-01	2C				CurveFitFailed		aadA5-01	3A	32.22	88.83	1.92			aadA5-01
aadA5-02	1A	30.21	83.64	1.98			aadA5-02	1B	31.81	86.85	1.96	CtIsLarge, SaturationBaselineRatioIsLow		aadA5-02	1C	34.39	83.44	1.89	CtIsLarge		aadA5-02	2A	29.55	88.32	2.02	MultipleMeltPeaks		aadA5-02	2B	30.31	87.85	1.98	CtIsLarge		aadA5-02	2C	37.09	78.02	1.78			aadA5-02	3A	31.93	87.45	1.98	MultipleMeltPeaks		aadA5-02
aadA9-01	1A	32.47	88.99	1.8			aadA9-01	1B				NoAmplification		aadA9-01	1C	34.95	92.01	1.88	CtIsLarge, SaturationBaselineRatioIsLow		aadA9-01	2A	34.35	87.82	1.83	MultipleMeltPeaks		aadA9-01	2B				LowEfficiency, CtIsLarge, CurveFitFailed		aadA9-01	2C				CurveFitFailed		aadA9-01	3A	35.7	83.68	1.81	MultipleMeltPeaks		aadA9-01
aadA9-02	1A	36.6	73.31	1.9			aadA9-02	1B				CurveFitFailed		aadA9-02	1C				CtIsLarge, SaturationBaselineRatioIsLow, CurveFitFailed		aadA9-02	2A	36.88	87.45	1.86	MultipleMeltPeaks		aadA9-02	2B	33.27	89.98	1.98	CtIsLarge		aadA9-02	2C	37.39	73.87	2.14			aadA9-02	3A	37.78	73.54	1.98	MultipleMeltPeaks		aadA9-02
aadD	1A				NoAmplification		aadD	1B				LowEfficiency, CtIsSmall, CurveFitFailed, HighBaseline		aadD	1C				NoAmplification		aadD	2A				NoAmplification		aadD	2B				NoAmplification		aadD	2C				NoAmplification		aadD	3A				NoAmplification		aadD
aadE	1A				LowEfficiency, CtIsSmall, SaturationBaselineRatioIsLow, CurveFitFailed, HighBaseline		aadE	1B				LowEfficiency, CtIsSmall, SaturationBaselineRatioIsLow, CurveFitFailed, HighBaseline		aadE	1C				NoAmplification		aadE	2A				NoAmplification		aadE	2B				NoAmplification		aadE	2C				NoAmplification		aadE	3A				CurveFitFailed		aadE
acrA-01	1A	28.94	88.82	1.92			acrA-01	1B	30.31	88.47	1.91	CtIsLarge, SaturationBaselineRatioIsLow		acrA-01	1C	27.18	88.45	1.97	MultipleMeltPeaks		acrA-01	2A	27.47	88.9	1.95			acrA-01	2B	26.21	82.52	1.96	SaturationBaselineRatioIsLow, MultipleMeltPeaks		acrA-01	2C	32.24	88.85	1.93			acrA-01	3A	25.85	88.91	1.95			acrA-01
acrA-02	1A	31.04	88.57	1.93			acrA-02	1B				CurveFitFailed		acrA-02	1C	34.27	82.42	1.88	CtIsLarge		acrA-02	2A	33.82	87.12	1.9	MultipleMeltPeaks		acrA-02	2B	32.61	88.48	1.96	CtIsLarge		acrA-02	2C	40.8	62.1	1.38	MultipleMeltPeaks		acrA-02	3A	32.62	84.79	1.84	MultipleMeltPeaks		acrA-02
acrA-03	1A	40.04	66.38	1.71	MultipleMeltPeaks		acrA-03	1B				CurveFitFailed		acrA-03	1C	33.48	89.71	1.86	CtIsLarge		acrA-03	2A	33.57	85.03	1.9	MultipleMeltPeaks		acrA-03	2B	32.35	88.21	2.04	CtIsLarge, SaturationBaselineRatioIsLow, MultipleMeltPeaks		acrA-03	2C	36.38	86.36	1.75			acrA-03	3A	34.04	88.53	1.79	MultipleMeltPeaks		acrA-03
acrA-04	1A	28.6	88.32	1.98	MultipleMeltPeaks		acrA-04	1B	29.15	80.6	1.92	SaturationBaselineRatioIsLow		acrA-04	1C	29.46	80.44	1.97	MultipleMeltPeaks		acrA-04	2A	28.04	81.51	1.96			acrA-04	2B	27.73	84.44	2.04	MultipleMeltPeaks		acrA-04	2C	30	81.96	1.96	MultipleMeltPeaks		acrA-04	3A	28.96	89.02	1.98	MultipleMeltPeaks		acrA-04
acrA-05	1A	28.4	88.98	1.97			acrA-05	1B	31.75	88.49	1.85	CtIsLarge, SaturationBaselineRatioIsLow, MultipleMeltPeaks		acrA-05	1C	28.87	88.69	2.03	SaturationBaselineRatioIsLow		acrA-05	2A	29.55	88.59	1.94			acrA-05	2B	29.22	88.09	2.02	SaturationBaselineRatioIsLow		acrA-05	2C	32.55	88.26	1.92	MultipleMeltPeaks		acrA-05	3A	27.93	90.96	1.98			acrA-05
acrB-01	1A	34.05	77.04	2			acrB-01	1B				LowEfficiency, CtIsSmall, CurveFitFailed, HighBaseline		acrB-01	1C				CtIsLarge, SaturationBaselineRatioIsLow, CurveFitFailed		acrB-01	2A				NoAmplification		acrB-01	2B				CtIsLarge, CurveFitFailed		acrB-01	2C	34.34	76.05	2.08			acrB-01	3A	31.06	86.28	1.97			acrB-01
acrF	1A	25.65	82.89	1.85			acrF	1B	27.35	82.83	1.93	SaturationBaselineRatioIsLow		acrF	1C	27.98	84.18	1.79	LowEfficiency, SaturationBaselineRatioIsLow		acrF	2A	27.96	84.68	1.99			acrF	2B	29.3	84.38	1.78	LowEfficiency, SaturationBaselineRatioIsLow		acrF	2C	32.91	85.91	1.97			acrF	3A	25.54	84.58	1.85			acrF
acrR-01	1A	30.34	85.43	1.93			acrR-01	1B				CtIsLarge, SaturationBaselineRatioIsLow, CurveFitFailed		acrR-01	1C	30.64	91.73	2.03	CtIsLarge, MultipleMeltPeaks		acrR-01	2A	30.64	84.84	1.93	MultipleMeltPeaks		acrR-01	2B	31.39	90.43	1.99	CtIsLarge		acrR-01	2C	33.92	89.24	1.89			acrR-01	3A	31.57	90.36	1.95	MultipleMeltPeaks		acrR-01
acrR-02	1A	32.39	84.99	1.88			acrR-02	1B	31.89	85.02	1.89	CtIsLarge, SaturationBaselineRatioIsLow		acrR-02	1C				CtIsLarge, CurveFitFailed		acrR-02	2A	30.19	87.04	1.99			acrR-02	2B	32.31	85.23	1.97	CtIsLarge, SaturationBaselineRatioIsLow		acrR-02	2C	33.09	85.5	1.88			acrR-02	3A	32.2	85.35	1.9			acrR-02
Actin	1A	21.86	86.73	1.95			Actin	1B	20.1	86.84	2.05	SaturationBaselineRatioIsLow, MultipleMeltPeaks		Actin	1C	19.68	86.85	1.97	SaturationBaselineRatioIsLow, MultipleMeltPeaks		Actin	2A	19.68	86.82	1.97	MultipleMeltPeaks		Actin	2B	21.07	86.75	1.96			Actin	2C	24.67	86.88	1.93	MultipleMeltPeaks		Actin	3A	20.87	86.85	1.97			Actin
adeA	1A	31.2	85.91	1.94			adeA	1B				BadR2, LowEfficiency, CtIsSmall, CurveFitFailed, HighBaseline		adeA	1C	32.08	79.2	1.8	LowEfficiency, CtIsLarge, SaturationBaselineRatioIsLow, MultipleMeltPeaks		adeA	2A	32.35	88.06	1.94	MultipleMeltPeaks		adeA	2B				LowEfficiency, CtIsLarge, SaturationBaselineRatioIsLow, CurveFitFailed		adeA	2C	35.73	77.71	1.88			adeA	3A	36.1	83.33	1.9	MultipleMeltPeaks		adeA
ampC-01	1A	29.66	85.06	1.99			ampC-01	1B	32.4	85.3	1.86	CtIsLarge, SaturationBaselineRatioIsLow		ampC-01	1C	28.18	85.18	1.93	MultipleMeltPeaks		ampC-01	2A	30.66	88.64	2.04	MultipleMeltPeaks		ampC-01	2B	30.17	80.1	1.89	CtIsLarge, SaturationBaselineRatioIsLow, MultipleMeltPeaks		ampC-01	2C	33.15	84.41	1.94			ampC-01	3A	31.79	84.96	2			ampC-01
ampC-02	1A	38.9	76.18	1.86	MultipleMeltPeaks		ampC-02	1B				CurveFitFailed		ampC-02	1C	32.2	89.24	2.01	CtIsLarge, SaturationBaselineRatioIsLow		ampC-02	2A	36.52	82.33	1.89	MultipleMeltPeaks		ampC-02	2B	30.59	88.62	1.83	CtIsLarge, MultipleMeltPeaks		ampC-02	2C	29.34	79.48	2			ampC-02	3A	37.41	77.14	1.89	MultipleMeltPeaks		ampC-02
ampC-04	1A	30.87	85.97	1.91	MultipleMeltPeaks		ampC-04	1B	31.45	79.46	1.7	LowEfficiency, CtIsLarge, SaturationBaselineRatioIsLow		ampC-04	1C	23.78	81.23	1.92			ampC-04	2A	29.72	86.48	1.78			ampC-04	2B	30.92	80.54	1.73	LowEfficiency, CtIsLarge		ampC-04	2C	35.95	81.2	1.93			ampC-04	3A	31.02	83.92	1.6	MultipleMeltPeaks		ampC-04
ampC-05	1A				LowEfficiency, CtIsSmall, CurveFitFailed, HighBaseline		ampC-05	1B				LowEfficiency, CtIsSmall, CurveFitFailed, HighBaseline		ampC-05	1C				NoAmplification		ampC-05	2A				NoAmplification		ampC-05	2B				LowEfficiency, CtIsSmall, CurveFitFailed, HighBaseline		ampC-05	2C				NoAmplification		ampC-05	3A				NoAmplification		ampC-05
ampC-06	1A	30.58	73.35	1.92			ampC-06	1B				LowEfficiency, CtIsSmall, SaturationBaselineRatioIsLow, CurveFitFailed, HighBaseline		ampC-06	1C	32.75	84.69	1.93	CtIsLarge, SaturationBaselineRatioIsLow		ampC-06	2A	31.13	84.07	1.71			ampC-06	2B				NoAmplification		ampC-06	2C				CurveFitFailed		ampC-06	3A				LowEfficiency, CtIsSmall, SaturationBaselineRatioIsLow, CurveFitFailed, HighBaseline		ampC-06
ampC-07	1A	27.55	88.24	1.93			ampC-07	1B	33.95	80.16	1.87	CtIsLarge, SaturationBaselineRatioIsLow, MultipleMeltPeaks		ampC-07	1C	23.67	85.46	1.87			ampC-07	2A	30.72	90.76	1.91	MultipleMeltPeaks		ampC-07	2B	30.66	88.37	1.83	CtIsLarge, SaturationBaselineRatioIsLow		ampC-07	2C				NoAmplification		ampC-07	3A	34.18	83.28	1.86			ampC-07
ampC-09	1A				BadR2, LowEfficiency, CtIsSmall, CurveFitFailed, HighBaseline		ampC-09	1B				LowEfficiency, CtIsSmall, CurveFitFailed, HighBaseline		ampC-09	1C	34	87.63	1.86	CtIsLarge		ampC-09	2A				NoAmplification		ampC-09	2B	33.68	91.29	1.78	LowEfficiency, CtIsLarge, SaturationBaselineRatioIsLow		ampC-09	2C				NoAmplification		ampC-09	3A				CurveFitFailed		ampC-09
ampC/blaDHA	1A	29.4	83.87	2			ampC/blaDHA	1B	30.78	86.63	1.82	CtIsLarge, SaturationBaselineRatioIsLow		ampC/blaDHA	1C	31.45	76.8	1.96	CtIsLarge, MultipleMeltPeaks		ampC/blaDHA	2A	28	87.46	1.99			ampC/blaDHA	2B	29.8	85.6	1.96	CtIsLarge, SaturationBaselineRatioIsLow		ampC/blaDHA	2C	30.31	85.3	1.96			ampC/blaDHA	3A	28.05	84.93	1.98	MultipleMeltPeaks		ampC/blaDHA
aph	1A				LowEfficiency, CtIsSmall, SaturationBaselineRatioIsLow, CurveFitFailed, HighBaseline		aph	1B				LowEfficiency, CtIsSmall, SaturationBaselineRatioIsLow, CurveFitFailed, HighBaseline		aph	1C				NoAmplification		aph	2A				NoAmplification		aph	2B				LowEfficiency, CtIsSmall, CurveFitFailed, HighBaseline		aph	2C				NoAmplification		aph	3A				LowEfficiency, CtIsSmall, SaturationBaselineRatioIsLow, CurveFitFailed, HighBaseline		aph
aph(2')-Id-01	1A				LowEfficiency, CtIsSmall, CurveFitFailed, HighBaseline		aph(2')-Id-01	1B				LowEfficiency, CtIsSmall, CurveFitFailed, HighBaseline		aph(2')-Id-01	1C				NoAmplification		aph(2')-Id-01	2A				NoAmplification		aph(2')-Id-01	2B				CurveFitFailed		aph(2')-Id-01	2C				NoAmplification		aph(2')-Id-01	3A				LowEfficiency, CtIsSmall, CurveFitFailed, HighBaseline		aph(2')-Id-01
aph(2')-Id-02	1A				LowEfficiency, CtIsSmall, CurveFitFailed, HighBaseline		aph(2')-Id-02	1B				CurveFitFailed		aph(2')-Id-02	1C				NoAmplification		aph(2')-Id-02	2A				NoAmplification		aph(2')-Id-02	2B				NoAmplification		aph(2')-Id-02	2C				NoAmplification		aph(2')-Id-02	3A				CurveFitFailed		aph(2')-Id-02
aph6ia	1A	31.92	79.43	1.93			aph6ia	1B				LowEfficiency, CtIsSmall, CurveFitFailed, HighBaseline		aph6ia	1C	32.07	81.93	1.96	CtIsLarge		aph6ia	2A	37.48	78.79	1.89	MultipleMeltPeaks		aph6ia	2B	30.88	77.87	1.99	CtIsLarge, SaturationBaselineRatioIsLow, MultipleMeltPeaks		aph6ia	2C				NoAmplification		aph6ia	3A	35.45	76.19	1.94	MultipleMeltPeaks		aph6ia
aphA1(aka kanR)	1A	38	77.99	1.84	MultipleMeltPeaks		aphA1(aka kanR)	1B				LowEfficiency, CtIsSmall, SaturationBaselineRatioIsLow, CurveFitFailed, HighBaseline		aphA1(aka kanR)	1C				NoAmplification		aphA1(aka kanR)	2A				NoAmplification		aphA1(aka kanR)	2B				LowEfficiency, CtIsSmall, CurveFitFailed, HighBaseline		aphA1(aka kanR)	2C				NoAmplification		aphA1(aka kanR)	3A				LowEfficiency, CtIsSmall, SaturationBaselineRatioIsLow, CurveFitFailed, HighBaseline		aphA1(aka kanR)
bacA-01	1A	37.6	84.76	1.91	MultipleMeltPeaks		bacA-01	1B				NoAmplification		bacA-01	1C	32.97	83.58	1.89	CtIsLarge, SaturationBaselineRatioIsLow		bacA-01	2A	33.16	74.39	1.87	MultipleMeltPeaks		bacA-01	2B				LowEfficiency, CtIsSmall, SaturationBaselineRatioIsLow, CurveFitFailed		bacA-01	2C	37.14	76.94	1.87			bacA-01	3A	35.19	90.87	1.78			bacA-01
bacA-02	1A	31.11	88.2	1.83	MultipleMeltPeaks		bacA-02	1B	32.56	88.04	1.78	LowEfficiency, CtIsLarge, SaturationBaselineRatioIsLow		bacA-02	1C	33.27	88.25	1.76	LowEfficiency, CtIsLarge		bacA-02	2A	30.51	88.44	1.86			bacA-02	2B	34.24	88.18	1.77	LowEfficiency, CtIsLarge, SaturationBaselineRatioIsLow, MultipleMeltPeaks		bacA-02	2C	36.31	84.56	1.73	MultipleMeltPeaks		bacA-02	3A	34.4	86.43	1.82	MultipleMeltPeaks		bacA-02
BETA-globin	1A	23.12	84.07	1.98			BETA-globin	1B	21.77	83.93	2.05	SaturationBaselineRatioIsLow		BETA-globin	1C	23.07	83.91	2	MultipleMeltPeaks		BETA-globin	2A	20.64	84.08	1.99			BETA-globin	2B	21.57	83.96	2.01			BETA-globin	2C	25.35	84.08	1.98			BETA-globin	3A	22.39	84.12	1.99			BETA-globin
bla-ACC-1	1A	33.47	86.08	1.91			bla-ACC-1	1B	34.2	85.94	1.84	CtIsLarge, SaturationBaselineRatioIsLow		bla-ACC-1	1C				CtIsLarge, CurveFitFailed		bla-ACC-1	2A	32.88	89.79	1.93			bla-ACC-1	2B	33.85	87.27	1.9	CtIsLarge, SaturationBaselineRatioIsLow		bla-ACC-1	2C	38.46	63.56	1.73	MultipleMeltPeaks		bla-ACC-1	3A	33.3	82.98	1.93	MultipleMeltPeaks		bla-ACC-1
bla-L1	1A	30.26	85.72	1.96	MultipleMeltPeaks		bla-L1	1B	30.96	84.07	1.9	CtIsLarge, SaturationBaselineRatioIsLow		bla-L1	1C	34.63	85.99	1.9	CtIsLarge, SaturationBaselineRatioIsLow, MultipleMeltPeaks		bla-L1	2A	28.08	85.55	2.01			bla-L1	2B	30.47	88.16	2	CtIsLarge, SaturationBaselineRatioIsLow, MultipleMeltPeaks		bla-L1	2C	30.61	81.99	1.95	MultipleMeltPeaks		bla-L1	3A	28.8	84.83	1.95	MultipleMeltPeaks		bla-L1
bla1	1A				LowEfficiency, CtIsSmall, CurveFitFailed, HighBaseline		bla1	1B				LowEfficiency, CtIsSmall, CurveFitFailed, HighBaseline		bla1	1C				NoAmplification		bla1	2A				NoAmplification		bla1	2B				NoAmplification		bla1	2C				NoAmplification		bla1	3A				LowEfficiency, CtIsSmall, SaturationBaselineRatioIsLow, CurveFitFailed, HighBaseline		bla1
blaCMY	1A	36.02	86.05	1.81	MultipleMeltPeaks		blaCMY	1B	33.82	76	1.88	CtIsLarge		blaCMY	1C	33.59	79.66	1.9	CtIsLarge, MultipleMeltPeaks		blaCMY	2A	32.35	76.3	1.89	MultipleMeltPeaks		blaCMY	2B				CtIsLarge, CurveFitFailed		blaCMY	2C				NoAmplification		blaCMY	3A	32.07	80.43	1.91	MultipleMeltPeaks		blaCMY
blaCMY2-01	1A	30.06	83.6	2.01			blaCMY2-01	1B	31.96	83.51	2.03	CtIsLarge		blaCMY2-01	1C	27.45	83.3	2.05			blaCMY2-01	2A	31.92	85.6	1.7	MultipleMeltPeaks		blaCMY2-01	2B				CtIsLarge, CurveFitFailed		blaCMY2-01	2C				CurveFitFailed		blaCMY2-01	3A	33.9	82.32	1.96	MultipleMeltPeaks		blaCMY2-01
blaCMY2-02	1A	28.29	89.66	1.98	MultipleMeltPeaks		blaCMY2-02	1B	27.56	89.18	2.08	MultipleMeltPeaks		blaCMY2-02	1C	28.83	87.47	2.03			blaCMY2-02	2A	26.55	89.37	2.02	MultipleMeltPeaks		blaCMY2-02	2B	27.9	85.02	2.03	MultipleMeltPeaks		blaCMY2-02	2C	30.51	82.65	1.95	MultipleMeltPeaks		blaCMY2-02	3A	28.29	85.48	2.03			blaCMY2-02
blaCTX-M-01	1A	33.93	86.02	1.89			blaCTX-M-01	1B				LowEfficiency, CtIsSmall, CurveFitFailed, HighBaseline		blaCTX-M-01	1C	32.88	85.9	1.92	CtIsLarge		blaCTX-M-01	2A	28.73	84.28	2.03			blaCTX-M-01	2B				LowEfficiency, CtIsLarge, SaturationBaselineRatioIsLow, CurveFitFailed		blaCTX-M-01	2C	38.7	76.31	1.93			blaCTX-M-01	3A	38.42	76.35	1.74	MultipleMeltPeaks		blaCTX-M-01
blaCTX-M-02	1A	28.75	85.24	1.92			blaCTX-M-02	1B	30.54	84.64	1.92	CtIsLarge		blaCTX-M-02	1C	33.46	79.45	1.83	CtIsLarge, MultipleMeltPeaks		blaCTX-M-02	2A	30.96	81.26	1.91	MultipleMeltPeaks		blaCTX-M-02	2B	30.02	90.13	1.96	CtIsLarge		blaCTX-M-02	2C	32.72	84.43	1.88			blaCTX-M-02	3A	28.7	84.85	1.96	MultipleMeltPeaks		blaCTX-M-02
blaCTX-M-03	1A				LowEfficiency, CtIsSmall, CurveFitFailed, HighBaseline		blaCTX-M-03	1B				LowEfficiency, CtIsSmall, CurveFitFailed, HighBaseline		blaCTX-M-03	1C				LowEfficiency, CtIsSmall, CurveFitFailed, HighBaseline		blaCTX-M-03	2A				NoAmplification		blaCTX-M-03	2B	34.02	84.41	1.92	CtIsLarge, SaturationBaselineRatioIsLow		blaCTX-M-03	2C				NoAmplification		blaCTX-M-03	3A	35.88	83.58	1.9			blaCTX-M-03
blaCTX-M-04	1A	30.35	87.14	1.95			blaCTX-M-04	1B	33.5	82.91	1.85	CtIsLarge, SaturationBaselineRatioIsLow		blaCTX-M-04	1C	30.14	86.48	1.74	LowEfficiency, CtIsLarge, MultipleMeltPeaks		blaCTX-M-04	2A	33.23	87.9	1.87	MultipleMeltPeaks		blaCTX-M-04	2B	29.27	87.32	2.01	MultipleMeltPeaks		blaCTX-M-04	2C				CurveFitFailed		blaCTX-M-04	3A	31.07	90.44	2.07	MultipleMeltPeaks		blaCTX-M-04
blaCTX-M-05	1A	32.66	84.47	1.73			blaCTX-M-05	1B	34.64	75.34	1.67	LowEfficiency, CtIsLarge, SaturationBaselineRatioIsLow		blaCTX-M-05	1C	30.6	76.61	1.83	CtIsLarge, SaturationBaselineRatioIsLow		blaCTX-M-05	2A	35.36	75.66	1.69	MultipleMeltPeaks		blaCTX-M-05	2B				LowEfficiency, CtIsLarge, SaturationBaselineRatioIsLow, CurveFitFailed		blaCTX-M-05	2C	35.06	75.81	1.75			blaCTX-M-05	3A	32.63	76.7	1.83			blaCTX-M-05
blaCTX-M-06	1A				NoAmplification		blaCTX-M-06	1B				NoAmplification		blaCTX-M-06	1C				NoAmplification		blaCTX-M-06	2A	35.65	83.89	1.93	MultipleMeltPeaks		blaCTX-M-06	2B				NoAmplification		blaCTX-M-06	2C	40.4	77.65	1.77			blaCTX-M-06	3A				NoAmplification		blaCTX-M-06
blaGES	1A				LowEfficiency, CtIsSmall, SaturationBaselineRatioIsLow, CurveFitFailed, HighBaseline		blaGES	1B				LowEfficiency, CtIsSmall, CurveFitFailed, HighBaseline		blaGES	1C				NoAmplification		blaGES	2A				NoAmplification		blaGES	2B				LowEfficiency, CtIsSmall, SaturationBaselineRatioIsLow, CurveFitFailed, HighBaseline		blaGES	2C				NoAmplification		blaGES	3A				NoAmplification		blaGES
blaIMP-01	1A	36.28	74.4	1.88			blaIMP-01	1B	32.4	74.33	1.93	CtIsLarge, SaturationBaselineRatioIsLow, MultipleMeltPeaks		blaIMP-01	1C				NoAmplification		blaIMP-01	2A	37.13	74.09	2.1			blaIMP-01	2B				NoAmplification		blaIMP-01	2C	38.23	74.68	2.02	MultipleMeltPeaks		blaIMP-01	3A				NoAmplification		blaIMP-01
blaIMP-02	1A				LowEfficiency, CtIsSmall, CurveFitFailed, HighBaseline		blaIMP-02	1B				LowEfficiency, CtIsSmall, CurveFitFailed, HighBaseline		blaIMP-02	1C				NoAmplification		blaIMP-02	2A	34.04	80.86	1.91			blaIMP-02	2B				CtIsLarge, SaturationBaselineRatioIsLow, CurveFitFailed		blaIMP-02	2C	36.84	80.66	1.84			blaIMP-02	3A	34.32	82.06	1.91			blaIMP-02
blaMOX/blaCMY	1A				CurveFitFailed		blaMOX/blaCMY	1B				CurveFitFailed		blaMOX/blaCMY	1C				LowEfficiency, CtIsLarge, CurveFitFailed		blaMOX/blaCMY	2A	33.21	88.22	1.89			blaMOX/blaCMY	2B				BadR2, LowEfficiency, CtIsSmall, CurveFitFailed, HighBaseline		blaMOX/blaCMY	2C				NoAmplification		blaMOX/blaCMY	3A	42.78	81.89	1.66			blaMOX/blaCMY
blaOCH	1A				NoAmplification		blaOCH	1B				NoAmplification		blaOCH	1C				NoAmplification		blaOCH	2A				NoAmplification		blaOCH	2B				NoAmplification		blaOCH	2C				NoAmplification		blaOCH	3A				NoAmplification		blaOCH
blaOKP	1A				NoAmplification		blaOKP	1B				NoAmplification		blaOKP	1C				NoAmplification		blaOKP	2A				NoAmplification		blaOKP	2B				NoAmplification		blaOKP	2C				NoAmplification		blaOKP	3A				NoAmplification		blaOKP
blaOXA1/blaOXA30	1A				LowEfficiency, CtIsSmall, SaturationBaselineRatioIsLow, CurveFitFailed, HighBaseline		blaOXA1/blaOXA30	1B				LowEfficiency, CtIsSmall, SaturationBaselineRatioIsLow, CurveFitFailed, HighBaseline		blaOXA1/blaOXA30	1C				NoAmplification		blaOXA1/blaOXA30	2A				NoAmplification		blaOXA1/blaOXA30	2B				LowEfficiency, CtIsSmall, CurveFitFailed, HighBaseline		blaOXA1/blaOXA30	2C				NoAmplification		blaOXA1/blaOXA30	3A				CurveFitFailed		blaOXA1/blaOXA30
blaOXA10-01	1A	38.57	77.51	1.75	MultipleMeltPeaks		blaOXA10-01	1B				CurveFitFailed		blaOXA10-01	1C				CtIsLarge, CurveFitFailed		blaOXA10-01	2A				NoAmplification		blaOXA10-01	2B				LowEfficiency, CtIsSmall, CurveFitFailed, HighBaseline		blaOXA10-01	2C				CurveFitFailed		blaOXA10-01	3A				LowEfficiency, CtIsSmall, CurveFitFailed, HighBaseline		blaOXA10-01
blaOXA10-02	1A	29.71	76.47	2.07			blaOXA10-02	1B				LowEfficiency, CtIsSmall, CurveFitFailed, HighBaseline		blaOXA10-02	1C				CurveFitFailed		blaOXA10-02	2A				NoAmplification		blaOXA10-02	2B				LowEfficiency, CtIsSmall, CurveFitFailed, HighBaseline		blaOXA10-02	2C				NoAmplification		blaOXA10-02	3A				LowEfficiency, CtIsSmall, SaturationBaselineRatioIsLow, CurveFitFailed, HighBaseline		blaOXA10-02
blaOXY	1A	29.75	88.67	1.69	MultipleMeltPeaks		blaOXY	1B	32.76	78.95	1.87	CtIsLarge, MultipleMeltPeaks		blaOXY	1C	29.49	90.06	1.9			blaOXY	2A	31.57	88.66	1.82			blaOXY	2B	31.02	89.85	1.85	CtIsLarge		blaOXY	2C	38.98	78.77	1.62	MultipleMeltPeaks		blaOXY	3A	32.18	91.02	1.87			blaOXY
blaPAO	1A	33.89	83.98	1.85	MultipleMeltPeaks		blaPAO	1B				LowEfficiency, CtIsSmall, CurveFitFailed, HighBaseline		blaPAO	1C				BadR2, CtIsLarge, CurveFitFailed		blaPAO	2A	33	81.05	1.91			blaPAO	2B				NoAmplification		blaPAO	2C				NoAmplification		blaPAO	3A	38.03	63.22	1.93	MultipleMeltPeaks		blaPAO
blaPER	1A	33.25	85.42	1.6			blaPER	1B				LowEfficiency, CtIsSmall, SaturationBaselineRatioIsLow, CurveFitFailed		blaPER	1C				CurveFitFailed		blaPER	2A	33.68	77.75	2			blaPER	2B				CurveFitFailed		blaPER	2C	35.99	73.96	1.84			blaPER	3A	36.05	70.1	1.65	MultipleMeltPeaks		blaPER
blaPSE	1A	38.28	86.62	1.75	MultipleMeltPeaks		blaPSE	1B				LowEfficiency, CtIsSmall, CurveFitFailed, HighBaseline		blaPSE	1C				NoAmplification		blaPSE	2A				NoAmplification		blaPSE	2B				LowEfficiency, CtIsSmall, SaturationBaselineRatioIsLow, CurveFitFailed, HighBaseline		blaPSE	2C				NoAmplification		blaPSE	3A	36.25	78.1	1.78	MultipleMeltPeaks		blaPSE
blaROB	1A	42.43	82.41	1.53	MultipleMeltPeaks		blaROB	1B				LowEfficiency, CtIsSmall, CurveFitFailed, HighBaseline		blaROB	1C	33.2	79.44	1.93	CtIsLarge		blaROB	2A				NoAmplification		blaROB	2B	34.32	87.28	1.9	CtIsLarge, SaturationBaselineRatioIsLow		blaROB	2C				NoAmplification		blaROB	3A				NoAmplification		blaROB
blaSFO	1A	28.75	87.28	1.93			blaSFO	1B	30.23	89.85	1.95	CtIsLarge, SaturationBaselineRatioIsLow		blaSFO	1C	29.14	86.77	1.95	SaturationBaselineRatioIsLow, MultipleMeltPeaks		blaSFO	2A	27.25	86.92	1.97	MultipleMeltPeaks		blaSFO	2B	29.49	89.8	1.98			blaSFO	2C	32.77	89.57	1.89	MultipleMeltPeaks		blaSFO	3A	29.06	89.89	1.93			blaSFO
blaSHV-01	1A	25.52	88.75	2.12			blaSHV-01	1B				CurveFitFailed		blaSHV-01	1C	24.45	88.85	1.71	LowEfficiency, SaturationBaselineRatioIsLow		blaSHV-01	2A	25.84	85.2	1.41	MultipleMeltPeaks		blaSHV-01	2B	27.1	88.81	1.82			blaSHV-01	2C	36.04	87.55	1.69	MultipleMeltPeaks		blaSHV-01	3A	25.89	88.84	2.03			blaSHV-01
blaSHV-02	1A	31.09	84.08	2			blaSHV-02	1B				CurveFitFailed		blaSHV-02	1C				NoAmplification		blaSHV-02	2A	30.16	84.39	2.02			blaSHV-02	2B				CtIsLarge, SaturationBaselineRatioIsLow, CurveFitFailed		blaSHV-02	2C				CurveFitFailed		blaSHV-02	3A	36.3	79.56	1.91			blaSHV-02
blaTEM	1A	18.93	79.49	2.09			blaTEM	1B	29.64	78.79	1.64	LowEfficiency, CtIsLarge, SaturationBaselineRatioIsLow		blaTEM	1C	17.57	79.27	1.91	SaturationBaselineRatioIsLow		blaTEM	2A	26.73	79.24	2.01			blaTEM	2B	18.65	79.09	1.77	LowEfficiency, SaturationBaselineRatioIsLow		blaTEM	2C				NoAmplification		blaTEM	3A	23.62	79.3	2.01			blaTEM
blaTLA	1A				CurveFitFailed		blaTLA	1B				CurveFitFailed		blaTLA	1C				NoAmplification		blaTLA	2A				NoAmplification		blaTLA	2B				NoAmplification		blaTLA	2C				NoAmplification		blaTLA	3A				LowEfficiency, CtIsSmall, CurveFitFailed, HighBaseline		blaTLA
blaVEB	1A				NoAmplification		blaVEB	1B				LowEfficiency, CtIsSmall, CurveFitFailed, HighBaseline		blaVEB	1C				NoAmplification		blaVEB	2A				NoAmplification		blaVEB	2B				NoAmplification		blaVEB	2C				NoAmplification		blaVEB	3A				NoAmplification		blaVEB
blaVIM	1A				NoAmplification		blaVIM	1B				LowEfficiency, CtIsSmall, CurveFitFailed, HighBaseline		blaVIM	1C				CtIsLarge, CurveFitFailed		blaVIM	2A				NoAmplification		blaVIM	2B				NoAmplification		blaVIM	2C				NoAmplification		blaVIM	3A	36.79	88.84	1.84			blaVIM
blaZ	1A				CurveFitFailed		blaZ	1B				LowEfficiency, CtIsSmall, CurveFitFailed, HighBaseline		blaZ	1C	24.76	75.73	2.01			blaZ	2A				NoAmplification		blaZ	2B				NoAmplification		blaZ	2C				NoAmplification		blaZ	3A				LowEfficiency, CtIsSmall, CurveFitFailed, HighBaseline		blaZ
carB	1A	34.38	87.58	1.89			carB	1B				LowEfficiency, CtIsSmall, CurveFitFailed, HighBaseline		carB	1C				NoAmplification		carB	2A	37.32	79.6	1.94	MultipleMeltPeaks		carB	2B				LowEfficiency, CtIsSmall, SaturationBaselineRatioIsLow, CurveFitFailed, HighBaseline		carB	2C				NoAmplification		carB	3A	37.07	83.41	1.9	MultipleMeltPeaks		carB
catA1	1A				NoAmplification		catA1	1B				NoAmplification		catA1	1C				NoAmplification		catA1	2A				NoAmplification		catA1	2B				NoAmplification		catA1	2C				NoAmplification		catA1	3A				NoAmplification		catA1
catB3	1A				NoAmplification		catB3	1B				CurveFitFailed		catB3	1C				LowEfficiency, CtIsSmall, SaturationBaselineRatioIsLow, CurveFitFailed, HighBaseline		catB3	2A	33.51	79.95	2.01	MultipleMeltPeaks		catB3	2B	34.27	79.75	1.99	CtIsLarge, SaturationBaselineRatioIsLow, MultipleMeltPeaks		catB3	2C				NoAmplification		catB3	3A	35.45	79.53	1.84	MultipleMeltPeaks		catB3
catB8	1A	26.76	82.07	1.94	MultipleMeltPeaks		catB8	1B	29	83.37	2.03	SaturationBaselineRatioIsLow		catB8	1C	28.91	82.13	2.04	SaturationBaselineRatioIsLow, MultipleMeltPeaks		catB8	2A	26.45	84.42	1.95	MultipleMeltPeaks		catB8	2B	28.45	82.02	2.07	SaturationBaselineRatioIsLow, MultipleMeltPeaks		catB8	2C	29.47	82.82	1.94			catB8	3A	27.8	82.55	1.97			catB8
ceoA	1A	27.96	82.25	1.94			ceoA	1B	30.26	82.1	1.95	CtIsLarge, SaturationBaselineRatioIsLow, MultipleMeltPeaks		ceoA	1C	29.06	91.96	2.02	MultipleMeltPeaks		ceoA	2A	26.71	82.15	2	MultipleMeltPeaks		ceoA	2B	28.67	87.79	2.02	SaturationBaselineRatioIsLow		ceoA	2C	28.69	82.37	1.95			ceoA	3A	27.61	82.35	1.98			ceoA
cepA	1A				NoAmplification		cepA	1B				LowEfficiency, CtIsSmall, SaturationBaselineRatioIsLow, CurveFitFailed, HighBaseline		cepA	1C				NoAmplification		cepA	2A	36.47	89.45	1.77	MultipleMeltPeaks		cepA	2B				LowEfficiency, CtIsSmall, SaturationBaselineRatioIsLow, CurveFitFailed, HighBaseline		cepA	2C				NoAmplification		cepA	3A	39.34	83.01	1.8	MultipleMeltPeaks		cepA
cfiA	1A	28.93	87.58	2.04			cfiA	1B	31.04	85.94	1.85	CtIsLarge, SaturationBaselineRatioIsLow		cfiA	1C	30.87	86.73	1.92	CtIsLarge, SaturationBaselineRatioIsLow, MultipleMeltPeaks		cfiA	2A				NoAmplification		cfiA	2B	28.47	88.37	2.03	SaturationBaselineRatioIsLow		cfiA	2C				NoAmplification		cfiA	3A	27.99	88.03	2.11			cfiA
cfr	1A				LowEfficiency, CtIsSmall, SaturationBaselineRatioIsLow, CurveFitFailed, HighBaseline		cfr	1B				LowEfficiency, CtIsSmall, SaturationBaselineRatioIsLow, CurveFitFailed, HighBaseline		cfr	1C				LowEfficiency, CtIsSmall, CurveFitFailed, HighBaseline		cfr	2A	33.31	76.14	1.94			cfr	2B				LowEfficiency, CtIsSmall, CurveFitFailed, HighBaseline		cfr	2C				NoAmplification		cfr	3A				LowEfficiency, CtIsSmall, SaturationBaselineRatioIsLow, CurveFitFailed, HighBaseline		cfr
cfxA	1A	24.06	77.73	2.09			cfxA	1B	27.75	77.25	2.1			cfxA	1C	20.11	77.37	2.09			cfxA	2A	25.8	77.62	1.98			cfxA	2B	20.5	77.44	2.03			cfxA	2C	27.15	77.63	2.07			cfxA	3A	22.14	77.8	2.09			cfxA
cmeA	1A	36.66	85.03	1.8			cmeA	1B				LowEfficiency, CtIsSmall, SaturationBaselineRatioIsLow, CurveFitFailed, HighBaseline		cmeA	1C				LowEfficiency, CtIsSmall, CurveFitFailed, HighBaseline		cmeA	2A	36.42	82.37	1.9			cmeA	2B				CurveFitFailed		cmeA	2C	39.95	75.45	1.69	MultipleMeltPeaks		cmeA	3A	35.98	82.01	1.81			cmeA
cmlA1-01	1A	37.82	80.37	1.84	MultipleMeltPeaks		cmlA1-01	1B				LowEfficiency, CtIsSmall, SaturationBaselineRatioIsLow, CurveFitFailed, HighBaseline		cmlA1-01	1C				LowEfficiency, CtIsLarge, CurveFitFailed		cmlA1-01	2A	34.02	85	1.94			cmlA1-01	2B	30.41	89.49	1.85	CtIsLarge, SaturationBaselineRatioIsLow		cmlA1-01	2C				NoAmplification		cmlA1-01	3A	31.2	89.55	1.95			cmlA1-01
cmlA1-02	1A	38.42	90.6	1.84	MultipleMeltPeaks		cmlA1-02	1B				LowEfficiency, CtIsSmall, CurveFitFailed, HighBaseline		cmlA1-02	1C	34.46	87.37	1.85	CtIsLarge		cmlA1-02	2A				NoAmplification		cmlA1-02	2B	31.71	89.54	1.91	CtIsLarge, SaturationBaselineRatioIsLow		cmlA1-02	2C				NoAmplification		cmlA1-02	3A	36	89.77	1.85			cmlA1-02
cmr	1A				CurveFitFailed		cmr	1B				CurveFitFailed		cmr	1C				LowEfficiency, CtIsSmall, SaturationBaselineRatioIsLow, CurveFitFailed, HighBaseline		cmr	2A	31.17	78.69	1.88			cmr	2B				CurveFitFailed		cmr	2C				CurveFitFailed		cmr	3A	36.91	78.68	1.87			cmr
cmx(A)	1A	27.11	84.43	1.99	MultipleMeltPeaks		cmx(A)	1B	28.17	84.62	2.05	SaturationBaselineRatioIsLow, MultipleMeltPeaks		cmx(A)	1C	26.26	85.16	1.96			cmx(A)	2A	25.89	84.65	2.05	MultipleMeltPeaks		cmx(A)	2B	27.89	87.09	2.12	SaturationBaselineRatioIsLow, MultipleMeltPeaks		cmx(A)	2C	28.42	86.62	1.94			cmx(A)	3A	26.55	86.71	2.01			cmx(A)
cphA-01	1A	29.35	86.44	1.95			cphA-01	1B	32.56	85.36	1.96	CtIsLarge, SaturationBaselineRatioIsLow, MultipleMeltPeaks		cphA-01	1C	32.91	87.33	1.94	CtIsLarge		cphA-01	2A	29.66	85.62	1.97	MultipleMeltPeaks		cphA-01	2B	28.48	87.94	1.95			cphA-01	2C	31.96	85.75	1.92			cphA-01	3A	29.68	85.18	2	MultipleMeltPeaks		cphA-01
cphA-02	1A	31.54	82.43	1.91			cphA-02	1B	33.52	82.03	2.01	CtIsLarge, SaturationBaselineRatioIsLow		cphA-02	1C	32.43	81.28	1.92	CtIsLarge		cphA-02	2A	31.65	82.51	1.94			cphA-02	2B	33.21	82.27	1.96	CtIsLarge		cphA-02	2C	34.53	82.53	1.87			cphA-02	3A	31.88	82.71	1.93			cphA-02
dfrA1	1A	37.43	78.78	1.79			dfrA1	1B	32.58	79.32	1.95	CtIsLarge		dfrA1	1C				LowEfficiency, CtIsLarge, CurveFitFailed		dfrA1	2A	31.1	88.39	1.96	MultipleMeltPeaks		dfrA1	2B	33.97	79.07	1.95	CtIsLarge		dfrA1	2C				NoAmplification		dfrA1	3A	36.27	79.96	1.86			dfrA1
dfrA12	1A	35.91	86.57	1.71	MultipleMeltPeaks		dfrA12	1B	34.72	81.74	1.82	CtIsLarge, MultipleMeltPeaks		dfrA12	1C				LowEfficiency, CtIsLarge, CurveFitFailed		dfrA12	2A	29.23	82.31	1.93			dfrA12	2B	31.45	87.13	1.97	CtIsLarge		dfrA12	2C				CurveFitFailed		dfrA12	3A	33.4	85.92	1.76			dfrA12
emrD	1A	30.59	87.94	1.86	MultipleMeltPeaks		emrD	1B	33.36	83.55	1.89	CtIsLarge		emrD	1C	29.26	83.69	1.91	MultipleMeltPeaks		emrD	2A	33.26	87.78	1.86			emrD	2B	32.86	83.49	1.89	CtIsLarge, MultipleMeltPeaks		emrD	2C	31.24	87.15	1.93			emrD	3A	31.45	91	1.88			emrD
ereA	1A	32.93	83.75	1.96	MultipleMeltPeaks		ereA	1B				CurveFitFailed		ereA	1C				LowEfficiency, CtIsSmall, CurveFitFailed, HighBaseline		ereA	2A	33.65	83.31	1.98			ereA	2B				CtIsLarge, SaturationBaselineRatioIsLow, CurveFitFailed		ereA	2C	40.71	79.2	1.61			ereA	3A	35.23	83.52	1.89			ereA
ereB	1A	36.45	83.45	1.76			ereB	1B				CurveFitFailed		ereB	1C	32.98	85.57	1.83	CtIsLarge, SaturationBaselineRatioIsLow, MultipleMeltPeaks		ereB	2A	31.83	86.36	2.13			ereB	2B	31.74	75.5	2.13	CtIsLarge		ereB	2C	36.25	61.94	1.63	MultipleMeltPeaks		ereB	3A	34.8	75.92	1.93	MultipleMeltPeaks		ereB
erm(34)	1A	32.86	87.66	1.92			erm(34)	1B				NoAmplification		erm(34)	1C				LowEfficiency, CtIsLarge, CurveFitFailed		erm(34)	2A				NoAmplification		erm(34)	2B	31.75	80.8	1.93	CtIsLarge		erm(34)	2C				NoAmplification		erm(34)	3A	35.16	80.06	1.95	MultipleMeltPeaks		erm(34)
erm(35)	1A				NoAmplification		erm(35)	1B				LowEfficiency, CtIsSmall, CurveFitFailed, HighBaseline		erm(35)	1C				NoAmplification		erm(35)	2A				NoAmplification		erm(35)	2B				NoAmplification		erm(35)	2C				NoAmplification		erm(35)	3A				LowEfficiency, CtIsSmall, CurveFitFailed, HighBaseline		erm(35)
erm(36)	1A	32.51	90.3	2.31	MultipleMeltPeaks		erm(36)	1B				LowEfficiency, CtIsSmall, SaturationBaselineRatioIsLow, CurveFitFailed, HighBaseline		erm(36)	1C	31.44	85.81	1.94	CtIsLarge, SaturationBaselineRatioIsLow		erm(36)	2A	29.67	85.62	2.17			erm(36)	2B				LowEfficiency, CtIsLarge, SaturationBaselineRatioIsLow, CurveFitFailed		erm(36)	2C	34.45	87.59	1.82			erm(36)	3A	30.72	84.38	2.02			erm(36)
ermA	1A				LowEfficiency, CtIsSmall, CurveFitFailed, HighBaseline		ermA	1B				CurveFitFailed		ermA	1C				NoAmplification		ermA	2A				NoAmplification		ermA	2B				NoAmplification		ermA	2C				NoAmplification		ermA	3A	37.02	74.33	1.93			ermA
ermA/ermTR	1A				NoAmplification		ermA/ermTR	1B				NoAmplification		ermA/ermTR	1C	30.45	75.73	1.99	CtIsLarge		ermA/ermTR	2A	29.47	75.64	1.96			ermA/ermTR	2B	26.32	75.62	1.98	SaturationBaselineRatioIsLow		ermA/ermTR	2C				NoAmplification		ermA/ermTR	3A	27.81	75.89	2.03			ermA/ermTR
ermB	1A	23.28	75.1	2.08			ermB	1B				LowEfficiency, CtIsSmall, CurveFitFailed, HighBaseline		ermB	1C	18.76	74.95	2.13			ermB	2A	23.08	74.93	2.12			ermB	2B	17.19	74.79	2.28	SaturationBaselineRatioIsLow		ermB	2C	26.07	75.05	2.07			ermB	3A	21.79	75.05	2.13			ermB
ermC	1A	33.84	81.96	2.02			ermC	1B				CurveFitFailed		ermC	1C	29.89	75.58	2.03	CtIsLarge		ermC	2A	35.49	85.47	1.97			ermC	2B				CurveFitFailed		ermC	2C	37.97	61.23	1.88	MultipleMeltPeaks		ermC	3A				CurveFitFailed		ermC
ermF	1A	27.64	74.72	2.02			ermF	1B				LowEfficiency, CtIsSmall, SaturationBaselineRatioIsLow, CurveFitFailed, HighBaseline		ermF	1C	23.76	74.42	2			ermF	2A	25.1	74.74	2.02			ermF	2B	21.73	74.54	2.06			ermF	2C				NoAmplification		ermF	3A	22.16	74.9	2.01			ermF
ermJ/ermD	1A				LowEfficiency, CtIsSmall, CurveFitFailed, HighBaseline		ermJ/ermD	1B				CurveFitFailed		ermJ/ermD	1C				LowEfficiency, CtIsLarge, CurveFitFailed		ermJ/ermD	2A				NoAmplification		ermJ/ermD	2B				LowEfficiency, CtIsSmall, CurveFitFailed, HighBaseline		ermJ/ermD	2C				NoAmplification		ermJ/ermD	3A				LowEfficiency, CtIsSmall, SaturationBaselineRatioIsLow, CurveFitFailed, HighBaseline		ermJ/ermD
ermK-01	1A				CurveFitFailed		ermK-01	1B				LowEfficiency, CtIsSmall, CurveFitFailed, HighBaseline		ermK-01	1C				CurveFitFailed		ermK-01	2A	30.52	75.46	1.98			ermK-01	2B	33.16	79.11	1.94	CtIsLarge		ermK-01	2C				CurveFitFailed		ermK-01	3A	34.17	89.21	1.95			ermK-01
ermK-02	1A	31.58	86.11	1.81			ermK-02	1B				CurveFitFailed		ermK-02	1C				LowEfficiency, CtIsLarge, CurveFitFailed		ermK-02	2A	30.09	85.75	1.81	MultipleMeltPeaks		ermK-02	2B	31.39	76.85	1.82	CtIsLarge, MultipleMeltPeaks		ermK-02	2C	34.21	82.54	1.79	MultipleMeltPeaks		ermK-02	3A	30.89	88.34	1.9			ermK-02
ermT-01	1A				LowEfficiency, CtIsSmall, CurveFitFailed, HighBaseline		ermT-01	1B				LowEfficiency, CtIsSmall, SaturationBaselineRatioIsLow, CurveFitFailed, HighBaseline		ermT-01	1C				LowEfficiency, CtIsSmall, CurveFitFailed, HighBaseline		ermT-01	2A				NoAmplification		ermT-01	2B				LowEfficiency, CtIsSmall, CurveFitFailed, HighBaseline		ermT-01	2C				NoAmplification		ermT-01	3A				LowEfficiency, CtIsSmall, CurveFitFailed, HighBaseline		ermT-01
ermT-02	1A	38.12	76.01	1.83	MultipleMeltPeaks		ermT-02	1B				CurveFitFailed		ermT-02	1C				CtIsLarge, CurveFitFailed		ermT-02	2A	34.9	79.61	2.01			ermT-02	2B				CurveFitFailed		ermT-02	2C				CurveFitFailed		ermT-02	3A	30.13	78.64	2.05			ermT-02
ermX	1A	25.42	83.66	1.94			ermX	1B	34.71	83.44	1.75	LowEfficiency, CtIsLarge, SaturationBaselineRatioIsLow, MultipleMeltPeaks		ermX	1C	21.94	83.45	1.95			ermX	2A	23	83.66	1.91			ermX	2B	19.67	83.52	1.93	SaturationBaselineRatioIsLow		ermX	2C	32.93	83.75	1.86	MultipleMeltPeaks		ermX	3A	20.98	83.95	1.95			ermX
ermY	1A				CurveFitFailed		ermY	1B				CurveFitFailed		ermY	1C				CurveFitFailed		ermY	2A				NoAmplification		ermY	2B				CurveFitFailed		ermY	2C				NoAmplification		ermY	3A				LowEfficiency, CtIsSmall, SaturationBaselineRatioIsLow, CurveFitFailed, HighBaseline		ermY
fabK	1A	22.01	79.12	2.18			fabK	1B	27.45	79.32	2.34	SaturationBaselineRatioIsLow, MultipleMeltPeaks		fabK	1C	18.79	78.88	2.3			fabK	2A	20.31	78.49	2.27			fabK	2B	18.65	77.53	2.24			fabK	2C	20.07	77.88	2.16			fabK	3A	21.47	79	2.19			fabK
floR	1A	32.57	78.84	2.01	MultipleMeltPeaks		floR	1B				LowEfficiency, CtIsSmall, CurveFitFailed, HighBaseline		floR	1C				NoAmplification		floR	2A	34.66	83.57	1.9			floR	2B	34.33	90.14	1.76	LowEfficiency, CtIsLarge		floR	2C				NoAmplification		floR	3A	36.32	89.84	1.8	MultipleMeltPeaks		floR
folA	1A	36.89	81.05	1.76			folA	1B				CurveFitFailed		folA	1C				NoAmplification		folA	2A	33.94	81.71	1.9			folA	2B				NoAmplification		folA	2C	37.52	84	1.79			folA	3A				NoAmplification		folA
fosB	1A				LowEfficiency, CtIsSmall, SaturationBaselineRatioIsLow, CurveFitFailed, HighBaseline		fosB	1B				LowEfficiency, CtIsSmall, SaturationBaselineRatioIsLow, CurveFitFailed, HighBaseline		fosB	1C				LowEfficiency, CtIsSmall, SaturationBaselineRatioIsLow, CurveFitFailed, HighBaseline		fosB	2A				LowEfficiency, CtIsSmall, SaturationBaselineRatioIsLow, CurveFitFailed, HighBaseline		fosB	2B				LowEfficiency, CtIsSmall, SaturationBaselineRatioIsLow, CurveFitFailed, HighBaseline		fosB	2C				LowEfficiency, CtIsSmall, SaturationBaselineRatioIsLow, CurveFitFailed, HighBaseline		fosB	3A				LowEfficiency, CtIsSmall, SaturationBaselineRatioIsLow, CurveFitFailed, HighBaseline		fosB
fosX	1A	34.41	71.06	2.06			fosX	1B				CurveFitFailed		fosX	1C				NoAmplification		fosX	2A				NoAmplification		fosX	2B				NoAmplification		fosX	2C				NoAmplification		fosX	3A				LowEfficiency, CtIsSmall, SaturationBaselineRatioIsLow, CurveFitFailed, HighBaseline		fosX
fox5	1A	25.8	87.8	1.99			fox5	1B	26.41	86.09	2.06			fox5	1C	26.89	87.18	1.98	MultipleMeltPeaks		fox5	2A	25.34	87.96	1.96			fox5	2B	25.71	86.49	2			fox5	2C	28.75	87.18	1.95			fox5	3A	25.86	87.91	1.99			fox5
imiR	1A				CurveFitFailed		imiR	1B				LowEfficiency, CtIsSmall, CurveFitFailed, HighBaseline		imiR	1C				NoAmplification		imiR	2A				NoAmplification		imiR	2B				BadR2, LowEfficiency, CtIsSmall, CurveFitFailed, HighBaseline		imiR	2C				CurveFitFailed		imiR	3A				CurveFitFailed		imiR
ImrA-01	1A	34.25	80.37	1.86			ImrA-01	1B				CurveFitFailed		ImrA-01	1C				NoAmplification		ImrA-01	2A	34.88	82.25	1.97	MultipleMeltPeaks		ImrA-01	2B				CurveFitFailed		ImrA-01	2C	37.76	79.59	1.82	MultipleMeltPeaks		ImrA-01	3A	34.27	80	1.98			ImrA-01
intI	1A	27.56	84.66	1.97	MultipleMeltPeaks		intI	1B	34.4	84.86	1.77	LowEfficiency, CtIsLarge, SaturationBaselineRatioIsLow		intI	1C	34.33	79.7	1.81	CtIsLarge, SaturationBaselineRatioIsLow, MultipleMeltPeaks		intI	2A	25.6	84.68	2.04	MultipleMeltPeaks		intI	2B	30.91	84.71	1.71	LowEfficiency, CtIsLarge, SaturationBaselineRatioIsLow		intI	2C	29.51	81.52	1.93	MultipleMeltPeaks		intI	3A	26.82	85.79	1.99	MultipleMeltPeaks		intI
intI1	1A	19.97	87.23	2.02			intI1	1B	19.67	87.07	2.28	SaturationBaselineRatioIsLow		intI1	1C	19.73	87.63	2.07			intI1	2A	19.06	87.54	2.03			intI1	2B	19.59	87.5	2.1	SaturationBaselineRatioIsLow		intI1	2C	22.43	87.1	2.01	MultipleMeltPeaks		intI1	3A	19.62	87.1	2.02			intI1
IS613	1A	26.43	79.45	2.13			IS613	1B	31.61	79.12	1.74	LowEfficiency, CtIsLarge, SaturationBaselineRatioIsLow		IS613	1C	23.09	79.58	1.77	LowEfficiency		IS613	2A	26.75	79.31	2.07			IS613	2B	23.93	79.46	1.74	LowEfficiency		IS613	2C				NoAmplification		IS613	3A	24.16	79.65	2.09			IS613
lnuA-01	1A				LowEfficiency, CtIsSmall, SaturationBaselineRatioIsLow, CurveFitFailed, HighBaseline		lnuA-01	1B				LowEfficiency, CtIsSmall, CurveFitFailed, HighBaseline		lnuA-01	1C				LowEfficiency, CtIsSmall, SaturationBaselineRatioIsLow, CurveFitFailed, HighBaseline		lnuA-01	2A				NoAmplification		lnuA-01	2B				LowEfficiency, CtIsSmall, SaturationBaselineRatioIsLow, CurveFitFailed, HighBaseline		lnuA-01	2C				NoAmplification		lnuA-01	3A				LowEfficiency, CtIsSmall, SaturationBaselineRatioIsLow, CurveFitFailed, HighBaseline		lnuA-01
lnuB-01	1A				NoAmplification		lnuB-01	1B				LowEfficiency, CtIsSmall, CurveFitFailed, HighBaseline		lnuB-01	1C				LowEfficiency, CtIsSmall, SaturationBaselineRatioIsLow, CurveFitFailed, HighBaseline		lnuB-01	2A				NoAmplification		lnuB-01	2B				CurveFitFailed		lnuB-01	2C				NoAmplification		lnuB-01	3A				CurveFitFailed		lnuB-01
lnuB-02	1A				LowEfficiency, CtIsSmall, CurveFitFailed, HighBaseline		lnuB-02	1B				LowEfficiency, CtIsSmall, CurveFitFailed, HighBaseline		lnuB-02	1C	30.22	73.76	2	CtIsLarge, SaturationBaselineRatioIsLow		lnuB-02	2A				NoAmplification		lnuB-02	2B				LowEfficiency, CtIsSmall, SaturationBaselineRatioIsLow, CurveFitFailed, HighBaseline		lnuB-02	2C				NoAmplification		lnuB-02	3A				NoAmplification		lnuB-02
lnuC	1A	33.06	83.91	1.76	MultipleMeltPeaks		lnuC	1B				LowEfficiency, CtIsSmall, CurveFitFailed, HighBaseline		lnuC	1C	34.28	87.66	1.9	CtIsLarge		lnuC	2A	28.65	88.12	1.8			lnuC	2B	33.17	85.26	1.81	CtIsLarge, SaturationBaselineRatioIsLow, MultipleMeltPeaks		lnuC	2C	32	84.29	1.87			lnuC	3A	30.16	88.32	1.84			lnuC
marR-01	1A	33.68	85.56	1.91			marR-01	1B				CurveFitFailed		marR-01	1C	33.93	86.37	1.92	CtIsLarge		marR-01	2A	33.93	85.22	1.88			marR-01	2B	31.03	85.09	1.93	CtIsLarge		marR-01	2C	33.31	85.2	1.91			marR-01	3A	32.7	85.46	1.91			marR-01
matA/mel	1A	20.76	77.81	2.06			matA/mel	1B	25.3	77.04	2.02	SaturationBaselineRatioIsLow, MultipleMeltPeaks		matA/mel	1C	14.87	77.75	2.22			matA/mel	2A	22.39	77.6	2.05			matA/mel	2B	17.66	77.56	2.12	SaturationBaselineRatioIsLow		matA/mel	2C	27.93	77.46	2.02			matA/mel	3A	20.25	77.77	2.07			matA/mel
mdetl1	1A				NoAmplification		mdetl1	1B				LowEfficiency, CtIsSmall, SaturationBaselineRatioIsLow, CurveFitFailed, HighBaseline		mdetl1	1C				NoAmplification		mdetl1	2A				NoAmplification		mdetl1	2B				LowEfficiency, CtIsSmall, CurveFitFailed, HighBaseline		mdetl1	2C				CurveFitFailed		mdetl1	3A				NoAmplification		mdetl1
mdtA	1A	35.13	81.97	1.7			mdtA	1B				CurveFitFailed		mdtA	1C	34.33	87.92	1.78	LowEfficiency, CtIsLarge, MultipleMeltPeaks		mdtA	2A	32.15	81.96	1.81			mdtA	2B	33.27	82.04	1.84	CtIsLarge, SaturationBaselineRatioIsLow, MultipleMeltPeaks		mdtA	2C				NoAmplification		mdtA	3A	34.4	81.83	1.75	MultipleMeltPeaks		mdtA
mdtE/yhiU	1A	38.21	80.54	1.73	MultipleMeltPeaks		mdtE/yhiU	1B				LowEfficiency, CtIsSmall, CurveFitFailed, HighBaseline		mdtE/yhiU	1C	34.35	87.87	1.84	CtIsLarge		mdtE/yhiU	2A	32.11	85.21	1.84			mdtE/yhiU	2B	33.69	83.65	1.88	CtIsLarge, MultipleMeltPeaks		mdtE/yhiU	2C				NoAmplification		mdtE/yhiU	3A	31.21	85.34	1.81			mdtE/yhiU
mecA	1A	29.59	74.87	2.05			mecA	1B				LowEfficiency, CtIsSmall, CurveFitFailed, HighBaseline		mecA	1C				NoAmplification		mecA	2A				NoAmplification		mecA	2B				NoAmplification		mecA	2C				NoAmplification		mecA	3A				LowEfficiency, CtIsSmall, SaturationBaselineRatioIsLow, CurveFitFailed, HighBaseline		mecA
mefA	1A	19.77	80.51	1.99	MultipleMeltPeaks		mefA	1B	25.49	80.34	1.93	SaturationBaselineRatioIsLow		mefA	1C	14.48	80.61	2.09	MultipleMeltPeaks		mefA	2A	21.69	80.5	1.94			mefA	2B	17.19	80.48	2.1	SaturationBaselineRatioIsLow		mefA	2C	26.2	80.54	1.94			mefA	3A	19.49	80.52	1.98	MultipleMeltPeaks		mefA
mepA	1A	28.76	87.83	2			mepA	1B				CurveFitFailed		mepA	1C	31.21	89.42	1.91	CtIsLarge, MultipleMeltPeaks		mepA	2A	30.96	87.29	1.96			mepA	2B	29.08	86.86	2.05			mepA	2C	30.06	76.42	2.04	MultipleMeltPeaks		mepA	3A	28.66	87.5	2			mepA
mexA	1A	35.04	79.96	1.9			mexA	1B				CurveFitFailed		mexA	1C				CtIsLarge, CurveFitFailed		mexA	2A	33.75	85.81	1.77			mexA	2B				LowEfficiency, CtIsLarge, CurveFitFailed		mexA	2C				NoAmplification		mexA	3A	35.84	85.51	1.81			mexA
mexD	1A	32.81	80.3	2			mexD	1B				CurveFitFailed		mexD	1C				CtIsLarge, CurveFitFailed		mexD	2A	31.73	84.65	1.79	MultipleMeltPeaks		mexD	2B	31.94	79.84	1.98	CtIsLarge, SaturationBaselineRatioIsLow, MultipleMeltPeaks		mexD	2C	35.08	79.64	2.02	MultipleMeltPeaks		mexD	3A	32.76	83.69	1.99			mexD
mexE	1A	36.03	88.45	1.83	MultipleMeltPeaks		mexE	1B				LowEfficiency, CtIsSmall, CurveFitFailed, HighBaseline		mexE	1C	29.53	87.34	1.88	CtIsLarge, SaturationBaselineRatioIsLow		mexE	2A	34.75	87.51	1.86	MultipleMeltPeaks		mexE	2B	32.56	88.2	1.91	CtIsLarge		mexE	2C				NoAmplification		mexE	3A	26.86	83.64	1.95			mexE
mexF	1A	25.87	87.72	2.03			mexF	1B				CurveFitFailed		mexF	1C	26.13	87.79	2.07	SaturationBaselineRatioIsLow, MultipleMeltPeaks		mexF	2A	25.21	87.08	2.18			mexF	2B	26.79	87.25	2.13	MultipleMeltPeaks		mexF	2C	30.73	87.31	2.01	MultipleMeltPeaks		mexF	3A	26.22	86.98	2.14	MultipleMeltPeaks		mexF
mphA-01	1A	28.74	86.79	2	MultipleMeltPeaks		mphA-01	1B				CurveFitFailed		mphA-01	1C	28.74	86.66	2.02			mphA-01	2A	27.52	87.21	1.96	MultipleMeltPeaks		mphA-01	2B	28.57	86.74	1.99			mphA-01	2C	34.31	80.16	1.93	MultipleMeltPeaks		mphA-01	3A	28.56	91.22	1.97			mphA-01
mphA-02	1A	26.8	86.84	2.26			mphA-02	1B	29.52	86.63	2.12	CtIsLarge		mphA-02	1C	28.16	87.53	2.07			mphA-02	2A	25.74	86.78	2.08			mphA-02	2B	27.89	86.77	2.25	MultipleMeltPeaks		mphA-02	2C	31.67	77	1.6	MultipleMeltPeaks		mphA-02	3A	26.73	87.87	2.2			mphA-02
mphB	1A	35.85	75.03	1.99	MultipleMeltPeaks		mphB	1B				CurveFitFailed		mphB	1C				BadR2, LowEfficiency, CtIsSmall, CurveFitFailed, HighBaseline		mphB	2A				NoAmplification		mphB	2B	33.77	89.28	2	CtIsLarge, MultipleMeltPeaks		mphB	2C				CurveFitFailed		mphB	3A	37.38	79.71	1.71	MultipleMeltPeaks		mphB
mphC	1A	31.66	86	1.81			mphC	1B				LowEfficiency, CtIsLarge, CurveFitFailed		mphC	1C				BadR2, LowEfficiency, CtIsSmall, CurveFitFailed, HighBaseline		mphC	2A	31.39	85.69	1.92			mphC	2B				CtIsLarge, CurveFitFailed		mphC	2C	37.95	80.02	1.59	MultipleMeltPeaks		mphC	3A	33.98	86.41	1.81			mphC
msrA-01	1A				CurveFitFailed		msrA-01	1B				LowEfficiency, CtIsSmall, CurveFitFailed, HighBaseline		msrA-01	1C				LowEfficiency, CtIsSmall, CurveFitFailed, HighBaseline		msrA-01	2A				NoAmplification		msrA-01	2B				LowEfficiency, CtIsSmall, CurveFitFailed, HighBaseline		msrA-01	2C				NoAmplification		msrA-01	3A				NoAmplification		msrA-01
msrC-01	1A				NoAmplification		msrC-01	1B				NoAmplification		msrC-01	1C				NoAmplification		msrC-01	2A				NoAmplification		msrC-01	2B				NoAmplification		msrC-01	2C				NoAmplification		msrC-01	3A				NoAmplification		msrC-01
mtrC-01	1A	33.04	83.23	1.94			mtrC-01	1B				CurveFitFailed		mtrC-01	1C	30.6	83.5	1.95	CtIsLarge		mtrC-01	2A	37.75	79.62	1.79	MultipleMeltPeaks		mtrC-01	2B				CtIsLarge, SaturationBaselineRatioIsLow, CurveFitFailed		mtrC-01	2C				NoAmplification		mtrC-01	3A	37.16	77.87	1.86	MultipleMeltPeaks		mtrC-01
mtrC-02	1A	28.26	84.44	2.05			mtrC-02	1B				CurveFitFailed		mtrC-02	1C				LowEfficiency, CtIsLarge, SaturationBaselineRatioIsLow, CurveFitFailed		mtrC-02	2A	28.02	84.2	2.04	MultipleMeltPeaks		mtrC-02	2B	34.57	84.25	1.86	CtIsLarge, SaturationBaselineRatioIsLow, MultipleMeltPeaks		mtrC-02	2C	29.41	84.69	1.97			mtrC-02	3A	29.98	84.13	2.02	MultipleMeltPeaks		mtrC-02
mtrD-02	1A	25.79	85	2.05			mtrD-02	1B	26.3	84.48	1.98	SaturationBaselineRatioIsLow, MultipleMeltPeaks		mtrD-02	1C	27.51	87	1.91	MultipleMeltPeaks		mtrD-02	2A	26	82.29	1.89			mtrD-02	2B	27.1	81.4	1.95	SaturationBaselineRatioIsLow		mtrD-02	2C	27.1	81.67	2.03	MultipleMeltPeaks		mtrD-02	3A	25.47	82.28	1.97			mtrD-02
mtrD-03	1A	29.86	89.29	1.9			mtrD-03	1B				CurveFitFailed		mtrD-03	1C	29.2	89.18	1.96			mtrD-03	2A	30.59	87.96	1.98			mtrD-03	2B	29.11	82.92	1.86	SaturationBaselineRatioIsLow		mtrD-03	2C	32.06	84.01	1.84			mtrD-03	3A	27.84	82.41	1.97	MultipleMeltPeaks		mtrD-03
NDM1	1A				LowEfficiency, CtIsSmall, SaturationBaselineRatioIsLow, CurveFitFailed		NDM1	1B				BadR2, LowEfficiency, CtIsSmall, SaturationBaselineRatioIsLow, CurveFitFailed, HighBaseline		NDM1	1C				CurveFitFailed		NDM1	2A				NoAmplification		NDM1	2B				CtIsLarge, CurveFitFailed		NDM1	2C	38.73	79.84	1.84			NDM1	3A				CurveFitFailed		NDM1
nimE	1A	31.55	75.94	1.85	MultipleMeltPeaks		nimE	1B				LowEfficiency, CtIsSmall, CurveFitFailed, HighBaseline		nimE	1C				CtIsLarge, CurveFitFailed		nimE	2A	34.78	86.92	1.96	MultipleMeltPeaks		nimE	2B				LowEfficiency, CtIsSmall, CurveFitFailed, HighBaseline		nimE	2C	32.84	76.16	2.02			nimE	3A	34.66	85.65	2.05			nimE
nisB	1A	35.93	82.76	1.88			nisB	1B				CurveFitFailed		nisB	1C				CtIsLarge, CurveFitFailed		nisB	2A	36.54	82.79	1.89			nisB	2B	34.59	86.32	1.84	CtIsLarge		nisB	2C	30.88	76.13	2.01			nisB	3A	29.86	81.96	1.97	MultipleMeltPeaks		nisB
oleC	1A	33.44	89.01	1.88			oleC	1B				LowEfficiency, CtIsSmall, CurveFitFailed, HighBaseline		oleC	1C	31.38	88.76	1.87	CtIsLarge		oleC	2A	35.03	89.58	1.88			oleC	2B	31.64	89.22	1.88	CtIsLarge		oleC	2C				NoAmplification		oleC	3A	35.8	87.08	1.88	MultipleMeltPeaks		oleC
oprD	1A	27.14	86.38	1.97	MultipleMeltPeaks		oprD	1B				CurveFitFailed		oprD	1C	27.61	86.4	2	MultipleMeltPeaks		oprD	2A	26.31	86.82	2.03			oprD	2B	27.85	86.62	1.99	SaturationBaselineRatioIsLow, MultipleMeltPeaks		oprD	2C	29.59	83.58	1.99			oprD	3A	26.94	86.85	2			oprD
oprJ	1A	29.69	88.43	1.95			oprJ	1B				LowEfficiency, CtIsSmall, CurveFitFailed, HighBaseline		oprJ	1C	28.94	88.13	1.97			oprJ	2A	34.1	91.38	1.9			oprJ	2B	29.29	90.84	1.99	SaturationBaselineRatioIsLow		oprJ	2C				NoAmplification		oprJ	3A	28.63	91.41	1.9			oprJ
pbp	1A	36.09	78.9	1.84			pbp	1B				LowEfficiency, CtIsSmall, SaturationBaselineRatioIsLow, CurveFitFailed, HighBaseline		pbp	1C				NoAmplification		pbp	2A	33.94	81.19	1.92			pbp	2B				LowEfficiency, CtIsSmall, SaturationBaselineRatioIsLow, CurveFitFailed, HighBaseline		pbp	2C				NoAmplification		pbp	3A	37.57	79.66	1.76	MultipleMeltPeaks		pbp
pbp2x	1A	23.24	76.43	2.12			pbp2x	1B				LowEfficiency, CtIsSmall, CurveFitFailed, HighBaseline		pbp2x	1C	18.67	76.37	1.99	SaturationBaselineRatioIsLow		pbp2x	2A	20.53	75.72	2.06			pbp2x	2B	19.66	76	2.1			pbp2x	2C	20.07	75.84	2.09			pbp2x	3A	21.82	75.7	2.06			pbp2x
Pbp5	1A				CurveFitFailed		Pbp5	1B				LowEfficiency, CtIsSmall, SaturationBaselineRatioIsLow, CurveFitFailed, HighBaseline		Pbp5	1C				NoAmplification		Pbp5	2A				NoAmplification		Pbp5	2B				NoAmplification		Pbp5	2C				NoAmplification		Pbp5	3A				LowEfficiency, CtIsSmall, SaturationBaselineRatioIsLow, CurveFitFailed, HighBaseline		Pbp5
penA	1A	30.59	87.12	1.86			penA	1B				NoAmplification		penA	1C	31.82	86.75	1.96	CtIsLarge, SaturationBaselineRatioIsLow		penA	2A	29.34	87.98	1.76	MultipleMeltPeaks		penA	2B	33.61	89.59	1.96	CtIsLarge, SaturationBaselineRatioIsLow, MultipleMeltPeaks		penA	2C	35.07	85.65	1.75			penA	3A	33.41	87.98	1.87	MultipleMeltPeaks		penA
pikR1	1A	34.47	81.48	1.9			pikR1	1B				CtIsLarge, SaturationBaselineRatioIsLow, CurveFitFailed		pikR1	1C	33.24	82.03	1.92	CtIsLarge		pikR1	2A	36.23	87.4	1.85			pikR1	2B	31.57	89.68	1.98	CtIsLarge		pikR1	2C	38.9	80.74	1.76			pikR1	3A	33.21	86.01	1.95	MultipleMeltPeaks		pikR1
pikR2	1A	30.91	84.51	2.02			pikR2	1B				CurveFitFailed		pikR2	1C	29.22	85.87	1.56	LowEfficiency, SaturationBaselineRatioIsLow, MultipleMeltPeaks		pikR2	2A	28.41	84.89	2.12			pikR2	2B	29.89	84.38	2.06	CtIsLarge		pikR2	2C	36.53	83.01	1.73	MultipleMeltPeaks		pikR2	3A	31.83	84.41	1.99			pikR2
pmrA	1A	22.28	79.81	2.09			pmrA	1B	27.79	79.49	2.12			pmrA	1C	18.5	79.42	2.13			pmrA	2A	20.94	79.61	2.15			pmrA	2B	19.19	79.66	2.16			pmrA	2C	20.27	80.28	2.07			pmrA	3A	21.99	80.07	2.11			pmrA
pncA	1A	32.45	88.95	1.94			pncA	1B	34.77	79.91	1.87	CtIsLarge, MultipleMeltPeaks		pncA	1C	29.05	89.69	1.91			pncA	2A	30.93	90.14	1.95	MultipleMeltPeaks		pncA	2B	33.38	80.45	1.9	CtIsLarge, MultipleMeltPeaks		pncA	2C	38.79	78.91	1.77	MultipleMeltPeaks		pncA	3A	29.47	84.77	1.91	MultipleMeltPeaks		pncA
putative multidrug	1A	31.57	84.4	1.97			putative multidrug	1B	33.53	71.93	2	CtIsLarge, MultipleMeltPeaks		putative multidrug	1C	34.81	83.95	1.88	CtIsLarge, MultipleMeltPeaks		putative multidrug	2A	31.34	84.42	1.96			putative multidrug	2B	29.45	83.97	2			putative multidrug	2C	35.38	71.51	1.9	MultipleMeltPeaks		putative multidrug	3A	31.57	83.94	1.97			putative multidrug
qac	1A	36.52	78.81	1.77	MultipleMeltPeaks		qac	1B				LowEfficiency, CtIsLarge, CurveFitFailed		qac	1C				LowEfficiency, CtIsLarge, CurveFitFailed		qac	2A	37.49	86.69	1.72			qac	2B	34.14	81.82	1.95	CtIsLarge		qac	2C				CurveFitFailed		qac	3A	37.6	75.5	1.84	MultipleMeltPeaks		qac
qacA	1A	37.67	80.1	1.78	MultipleMeltPeaks		qacA	1B				CurveFitFailed		qacA	1C	35	70.44	1.85	CtIsLarge		qacA	2A				NoAmplification		qacA	2B				LowEfficiency, CtIsSmall, CurveFitFailed, HighBaseline		qacA	2C	31.67	70.75	1.83			qacA	3A				CurveFitFailed		qacA
qacA/qacB	1A	35.18	86.6	1.51	MultipleMeltPeaks		qacA/qacB	1B				CurveFitFailed		qacA/qacB	1C				LowEfficiency, CtIsLarge, CurveFitFailed		qacA/qacB	2A	32.44	87	1.63	MultipleMeltPeaks		qacA/qacB	2B				LowEfficiency, CtIsSmall, CurveFitFailed, HighBaseline		qacA/qacB	2C				CurveFitFailed		qacA/qacB	3A	37	85	1.54	MultipleMeltPeaks		qacA/qacB
qacEdelta1-01	1A				LowEfficiency, CtIsSmall, CurveFitFailed, HighBaseline		qacEdelta1-01	1B				CurveFitFailed		qacEdelta1-01	1C	31.75	79.02	2	CtIsLarge		qacEdelta1-01	2A	28.5	79.24	1.92			qacEdelta1-01	2B				LowEfficiency, CtIsSmall, CurveFitFailed, HighBaseline		qacEdelta1-01	2C				NoAmplification		qacEdelta1-01	3A				CurveFitFailed		qacEdelta1-01
qacEdelta1-02	1A	29.24	83.44	2.02	MultipleMeltPeaks		qacEdelta1-02	1B	31.2	79.44	1.85	CtIsLarge, SaturationBaselineRatioIsLow, MultipleMeltPeaks		qacEdelta1-02	1C	28.63	77.84	2.05	MultipleMeltPeaks		qacEdelta1-02	2A	27.65	78.62	1.95			qacEdelta1-02	2B	30.86	88.27	1.99	CtIsLarge, SaturationBaselineRatioIsLow		qacEdelta1-02	2C	30.83	81.24	2.02	MultipleMeltPeaks		qacEdelta1-02	3A	30.19	88.2	2	MultipleMeltPeaks		qacEdelta1-02
qacH-01	1A	31.03	86.61	1.97	MultipleMeltPeaks		qacH-01	1B	34.08	82.1	1.99	CtIsLarge, SaturationBaselineRatioIsLow, MultipleMeltPeaks		qacH-01	1C	32.1	87.75	1.93	CtIsLarge		qacH-01	2A	29.85	86.73	2.05			qacH-01	2B	28.68	87.73	2.01			qacH-01	2C				NoAmplification		qacH-01	3A	29.69	87.67	2.03			qacH-01
qacH-02	1A	33.64	86.26	1.7	MultipleMeltPeaks		qacH-02	1B				LowEfficiency, CtIsSmall, SaturationBaselineRatioIsLow, CurveFitFailed, HighBaseline		qacH-02	1C				LowEfficiency, CtIsSmall, SaturationBaselineRatioIsLow, CurveFitFailed, HighBaseline		qacH-02	2A	29.91	84	1.73			qacH-02	2B				LowEfficiency, CtIsLarge, CurveFitFailed		qacH-02	2C	35.65	83.62	1.62			qacH-02	3A	32.96	83.94	1.67			qacH-02
qnrA	1A	36.84	80.24	1.82			qnrA	1B				CtIsLarge, CurveFitFailed		qnrA	1C				CtIsLarge, CurveFitFailed		qnrA	2A	34.95	79.71	2			qnrA	2B	34.84	87.43	1.95	CtIsLarge		qnrA	2C	35.76	78.73	1.88	MultipleMeltPeaks		qnrA	3A	35.97	84.36	1.89			qnrA
rarD-02	1A				NoAmplification		rarD-02	1B				CurveFitFailed		rarD-02	1C				CtIsLarge, SaturationBaselineRatioIsLow, CurveFitFailed		rarD-02	2A	35.31	84.54	1.96	MultipleMeltPeaks		rarD-02	2B				CtIsLarge, CurveFitFailed		rarD-02	2C				NoAmplification		rarD-02	3A	33.27	85.76	2.02	MultipleMeltPeaks		rarD-02
sat4	1A				CurveFitFailed		sat4	1B				CurveFitFailed		sat4	1C				LowEfficiency, CtIsSmall, SaturationBaselineRatioIsLow, CurveFitFailed, HighBaseline		sat4	2A				NoAmplification		sat4	2B				CurveFitFailed		sat4	2C				NoAmplification		sat4	3A				BadR2, LowEfficiency, CtIsSmall, CurveFitFailed, HighBaseline		sat4
sdeB	1A				CurveFitFailed		sdeB	1B				LowEfficiency, CtIsSmall, CurveFitFailed, HighBaseline		sdeB	1C				NoAmplification		sdeB	2A	37.97	80.76	1.77	MultipleMeltPeaks		sdeB	2B				CurveFitFailed		sdeB	2C				NoAmplification		sdeB	3A				CurveFitFailed		sdeB
spcN-01	1A	35.91	79.66	1.81	MultipleMeltPeaks		spcN-01	1B				BadR2, LowEfficiency, CtIsSmall, SaturationBaselineRatioIsLow, CurveFitFailed, HighBaseline		spcN-01	1C				CtIsLarge, CurveFitFailed		spcN-01	2A	35.5	86.76	1.94			spcN-01	2B				LowEfficiency, CtIsSmall, CurveFitFailed, HighBaseline		spcN-01	2C				NoAmplification		spcN-01	3A	37.6	67.18	1.99	MultipleMeltPeaks		spcN-01
speA	1A				NoAmplification		speA	1B				LowEfficiency, CtIsSmall, CurveFitFailed, HighBaseline		speA	1C				NoAmplification		speA	2A				NoAmplification		speA	2B				NoAmplification		speA	2C				NoAmplification		speA	3A				NoAmplification		speA
str	1A				CurveFitFailed		str	1B				LowEfficiency, CtIsSmall, CurveFitFailed, HighBaseline		str	1C				LowEfficiency, CtIsSmall, CurveFitFailed, HighBaseline		str	2A				NoAmplification		str	2B				LowEfficiency, CtIsSmall, CurveFitFailed, HighBaseline		str	2C				NoAmplification		str	3A				NoAmplification		str
strA	1A				LowEfficiency, CtIsSmall, SaturationBaselineRatioIsLow, CurveFitFailed, HighBaseline		strA	1B				LowEfficiency, CtIsSmall, CurveFitFailed, HighBaseline		strA	1C				LowEfficiency, CtIsSmall, CurveFitFailed, HighBaseline		strA	2A				NoAmplification		strA	2B				LowEfficiency, CtIsSmall, CurveFitFailed, HighBaseline		strA	2C				NoAmplification		strA	3A				CurveFitFailed		strA
strB	1A	29.4	84.03	1.93			strB	1B				CurveFitFailed		strB	1C	24.42	84.05	1.91			strB	2A	27.36	84.06	1.94			strB	2B				CurveFitFailed		strB	2C				NoAmplification		strB	3A	28.63	83.98	1.94			strB
sul1	1A	30.71	89.13	1.97	MultipleMeltPeaks		sul1	1B	33.73	89.06	1.74	LowEfficiency, CtIsLarge, SaturationBaselineRatioIsLow		sul1	1C	31.78	89.63	1.79	LowEfficiency, CtIsLarge		sul1	2A	28.28	89.84	1.91			sul1	2B	31.83	89.45	1.91	CtIsLarge, SaturationBaselineRatioIsLow		sul1	2C	31.68	88.82	1.83			sul1	3A	30.81	89.98	2.06			sul1
sul2	1A	38.77	79.72	1.74			sul2	1B				CurveFitFailed		sul2	1C	33.49	90.38	1.78	LowEfficiency, CtIsLarge		sul2	2A				NoAmplification		sul2	2B	33.78	88.88	2.09	CtIsLarge, SaturationBaselineRatioIsLow		sul2	2C				NoAmplification		sul2	3A				CurveFitFailed		sul2
sulA/folP-01	1A	20.53	81.61	1.99			sulA/folP-01	1B	26.34	81.45	1.99	SaturationBaselineRatioIsLow		sulA/folP-01	1C	16.45	81.43	2.02			sulA/folP-01	2A	19.75	80.8	1.97			sulA/folP-01	2B	17.23	81.42	2.1			sulA/folP-01	2C	19.43	81.74	1.97			sulA/folP-01	3A	20.3	81.56	2.01			sulA/folP-01
sulA/folP-03	1A	21.14	83.25	2.02			sulA/folP-03	1B	25.98	83.46	1.95	SaturationBaselineRatioIsLow		sulA/folP-03	1C	15.62	83.47	2.11	SaturationBaselineRatioIsLow		sulA/folP-03	2A	20.54	83.59	1.97			sulA/folP-03	2B	18.08	82.89	2.05			sulA/folP-03	2C	20.33	83.2	1.97			sulA/folP-03	3A	21.34	82.91	2.01			sulA/folP-03
tet(32)	1A	25.82	81.39	1.99			tet(32)	1B	32.4	86.68	1.93	CtIsLarge, SaturationBaselineRatioIsLow		tet(32)	1C	20.93	81.5	1.99			tet(32)	2A	27.57	81.24	1.96			tet(32)	2B	25.43	86.65	1.98	MultipleMeltPeaks		tet(32)	2C				NoAmplification		tet(32)	3A	25.57	81.42	1.99			tet(32)
tet(34)	1A	27.89	80.44	2.03			tet(34)	1B	31.63	75.28	1.87	CtIsLarge, SaturationBaselineRatioIsLow		tet(34)	1C	33.16	75.11	1.88	CtIsLarge, SaturationBaselineRatioIsLow		tet(34)	2A	28.24	76.24	1.99			tet(34)	2B	32.89	75.02	1.88	CtIsLarge, SaturationBaselineRatioIsLow, MultipleMeltPeaks		tet(34)	2C	26.56	76.48	2.06			tet(34)	3A	28.2	76.27	2.04			tet(34)
tet(35)	1A	36.24	80.85	1.83			tet(35)	1B	27.54	77.08	2.05	SaturationBaselineRatioIsLow		tet(35)	1C	28.34	77.26	2.03	SaturationBaselineRatioIsLow		tet(35)	2A	33.26	84.38	1.98			tet(35)	2B	28.23	82	1.98	SaturationBaselineRatioIsLow		tet(35)	2C				NoAmplification		tet(35)	3A				NoAmplification		tet(35)
tet(36)-A	1A	35.58	81.88	1.9			tet(36)-A	1B				NoAmplification		tet(36)-A	1C				CtIsLarge, CurveFitFailed		tet(36)-A	2A	36.69	82.22	1.91	MultipleMeltPeaks		tet(36)-A	2B	34.09	81.86	2.08	CtIsLarge, SaturationBaselineRatioIsLow		tet(36)-A	2C				NoAmplification		tet(36)-A	3A	34.59	81.92	1.89			tet(36)-A
tet(36)-B	1A	38.45	78.29	2.01	MultipleMeltPeaks		tet(36)-B	1B				CurveFitFailed		tet(36)-B	1C	35	81.13	1.74	LowEfficiency, CtIsLarge		tet(36)-B	2A				NoAmplification		tet(36)-B	2B	34.92	83.65	1.92	CtIsLarge, SaturationBaselineRatioIsLow		tet(36)-B	2C				NoAmplification		tet(36)-B	3A	36.82	78.48	2.38			tet(36)-B
tet(37)	1A	28.84	75.95	2	MultipleMeltPeaks		tet(37)	1B	30.33	84.68	1.9	CtIsLarge, SaturationBaselineRatioIsLow		tet(37)	1C	23.57	83.1	2			tet(37)	2A	27.19	81.77	2	MultipleMeltPeaks		tet(37)	2B	20.69	83.82	2	SaturationBaselineRatioIsLow		tet(37)	2C	28.61	75.98	1.99	MultipleMeltPeaks		tet(37)	3A	24.06	76.27	2	MultipleMeltPeaks		tet(37)
tetA-01	1A	30.04	85.22	2.22			tetA-01	1B				CurveFitFailed		tetA-01	1C				BadR2, SaturationBaselineRatioIsLow, CurveFitFailed, HighBaseline		tetA-01	2A	28.92	85.22	1.92			tetA-01	2B	16.96	83.07	2.22	SaturationBaselineRatioIsLow, MultipleMeltPeaks		tetA-01	2C	34.81	85.15	1.81			tetA-01	3A	29.43	85.26	1.91			tetA-01
tetA-02	1A	38.97	80.29	1.7	MultipleMeltPeaks		tetA-02	1B				CurveFitFailed		tetA-02	1C	29.54	82.01	1.97	CtIsLarge		tetA-02	2A	33.36	80.38	1.91			tetA-02	2B	30.72	88.87	1.99	CtIsLarge		tetA-02	2C	36.67	82.08	1.86			tetA-02	3A	36.83	87.07	1.79			tetA-02
tetB-01	1A	24.1	86.35	2.02			tetB-01	1B	27.82	85.87	1.99			tetB-01	1C	19.52	79.56	1.99	MultipleMeltPeaks		tetB-01	2A	27.75	87.83	1.97	MultipleMeltPeaks		tetB-01	2B	26.18	86.29	1.99	MultipleMeltPeaks		tetB-01	2C	33.12	88.13	1.87			tetB-01	3A	25.08	86.26	2	MultipleMeltPeaks		tetB-01
tetB-02	1A	23.07	79.9	2.01			tetB-02	1B				CurveFitFailed		tetB-02	1C	19.51	79.66	2.01			tetB-02	2A	25.89	79.72	1.98			tetB-02	2B	24.43	79.61	1.97			tetB-02	2C	33.89	83.54	1.87	MultipleMeltPeaks		tetB-02	3A	24.23	79.91	1.99			tetB-02
tetC-01	1A	23.61	75.52	2.03			tetC-01	1B	30.57	75.09	1.96	CtIsLarge		tetC-01	1C	20.27	75.56	2.04			tetC-01	2A	28.4	75.15	1.98			tetC-01	2B	24.59	75.32	1.95			tetC-01	2C				NoAmplification		tetC-01	3A	25.81	75.42	2.02			tetC-01
tetC-02	1A	22.77	76.27	2.05			tetC-02	1B	27.28	75.68	2.18	SaturationBaselineRatioIsLow		tetC-02	1C	19.06	76.13	2.09			tetC-02	2A	27.83	76	2.05			tetC-02	2B	24.52	75.96	2.04			tetC-02	2C				NoAmplification		tetC-02	3A	25.84	76.21	2.05			tetC-02
tetD-01	1A				CurveFitFailed		tetD-01	1B				CurveFitFailed		tetD-01	1C				LowEfficiency, CtIsSmall, CurveFitFailed, HighBaseline		tetD-01	2A				NoAmplification		tetD-01	2B				LowEfficiency, CtIsSmall, CurveFitFailed, HighBaseline		tetD-01	2C				NoAmplification		tetD-01	3A				CurveFitFailed		tetD-01
tetD-02	1A	32.72	77.29	2.08			tetD-02	1B				CurveFitFailed		tetD-02	1C				CtIsLarge, CurveFitFailed		tetD-02	2A				NoAmplification		tetD-02	2B				CtIsLarge, SaturationBaselineRatioIsLow, CurveFitFailed		tetD-02	2C				CurveFitFailed		tetD-02	3A	32.84	81.42	2.08	MultipleMeltPeaks		tetD-02
tetE	1A				CurveFitFailed		tetE	1B				LowEfficiency, CtIsSmall, SaturationBaselineRatioIsLow, CurveFitFailed, HighBaseline		tetE	1C				LowEfficiency, CtIsSmall, CurveFitFailed, HighBaseline		tetE	2A				NoAmplification		tetE	2B				CurveFitFailed		tetE	2C				NoAmplification		tetE	3A				NoAmplification		tetE
tetG-01	1A	31.39	85.57	1.95			tetG-01	1B				CurveFitFailed		tetG-01	1C				LowEfficiency, CtIsSmall, CurveFitFailed, HighBaseline		tetG-01	2A	29.01	87.16	2.05			tetG-01	2B				LowEfficiency, CtIsSmall, SaturationBaselineRatioIsLow, CurveFitFailed, HighBaseline		tetG-01	2C	35.13	82.26	1.86			tetG-01	3A	30.95	81.89	2	MultipleMeltPeaks		tetG-01
tetG-02	1A	32.03	87.17	1.92			tetG-02	1B				LowEfficiency, CtIsSmall, SaturationBaselineRatioIsLow, CurveFitFailed, HighBaseline		tetG-02	1C				LowEfficiency, CtIsSmall, SaturationBaselineRatioIsLow, CurveFitFailed, HighBaseline		tetG-02	2A	27.99	87.26	1.91			tetG-02	2B				LowEfficiency, CtIsSmall, SaturationBaselineRatioIsLow, CurveFitFailed, HighBaseline		tetG-02	2C				CurveFitFailed		tetG-02	3A	32.68	91.43	1.94	MultipleMeltPeaks		tetG-02
tetH	1A				NoAmplification		tetH	1B				LowEfficiency, CtIsSmall, SaturationBaselineRatioIsLow, CurveFitFailed, HighBaseline		tetH	1C				CurveFitFailed		tetH	2A				NoAmplification		tetH	2B				LowEfficiency, CtIsSmall, CurveFitFailed, HighBaseline		tetH	2C				NoAmplification		tetH	3A				NoAmplification		tetH
tetJ	1A				CurveFitFailed		tetJ	1B				CurveFitFailed		tetJ	1C				NoAmplification		tetJ	2A				NoAmplification		tetJ	2B				NoAmplification		tetJ	2C				NoAmplification		tetJ	3A				LowEfficiency, CtIsSmall, CurveFitFailed, HighBaseline		tetJ
tetK	1A	30.28	72.45	1.98			tetK	1B				CurveFitFailed		tetK	1C				LowEfficiency, CtIsSmall, CurveFitFailed, HighBaseline		tetK	2A				NoAmplification		tetK	2B				LowEfficiency, CtIsSmall, SaturationBaselineRatioIsLow, CurveFitFailed, HighBaseline		tetK	2C				NoAmplification		tetK	3A				CurveFitFailed		tetK
tetL-01	1A	36.25	82.43	1.82	MultipleMeltPeaks		tetL-01	1B				LowEfficiency, CtIsSmall, SaturationBaselineRatioIsLow, CurveFitFailed, HighBaseline		tetL-01	1C				LowEfficiency, CtIsSmall, SaturationBaselineRatioIsLow, CurveFitFailed, HighBaseline		tetL-01	2A	32.77	81.02	1.9			tetL-01	2B				LowEfficiency, CtIsSmall, CurveFitFailed, HighBaseline		tetL-01	2C				NoAmplification		tetL-01	3A	34.92	80.92	1.78			tetL-01
tetL-02	1A	32.66	85.31	1.8			tetL-02	1B				LowEfficiency, CtIsSmall, SaturationBaselineRatioIsLow, CurveFitFailed, HighBaseline		tetL-02	1C				LowEfficiency, CtIsSmall, SaturationBaselineRatioIsLow, CurveFitFailed, HighBaseline		tetL-02	2A	31.46	85.25	1.84			tetL-02	2B				CurveFitFailed		tetL-02	2C	35.07	78.28	1.87	MultipleMeltPeaks		tetL-02	3A	31.56	85.46	1.83			tetL-02
tetM-01	1A	20.56	76.3	2.03			tetM-01	1B				CurveFitFailed		tetM-01	1C				LowEfficiency, CtIsSmall, SaturationBaselineRatioIsLow, CurveFitFailed, HighBaseline		tetM-01	2A	21.95	76.04	2.02			tetM-01	2B				LowEfficiency, CtIsSmall, CurveFitFailed, HighBaseline		tetM-01	2C	25.06	76.04	1.98			tetM-01	3A	20.12	76.2	2.04			tetM-01
tetM-02	1A	21.46	77.88	2.01			tetM-02	1B	28.19	77.53	2.06			tetM-02	1C	17.28	77.31	2.04			tetM-02	2A	22.45	77.83	2.03			tetM-02	2B	17.54	77.43	2.11			tetM-02	2C	26.9	77.66	1.97			tetM-02	3A	20.26	77.9	2.05			tetM-02
tetO-01	1A				CurveFitFailed		tetO-01	1B				CurveFitFailed		tetO-01	1C	26.19	76.66	2.02			tetO-01	2A	28.4	76.88	2.02			tetO-01	2B	22.57	76.8	2.08			tetO-01	2C	27.83	61.62	1.62	SaturationBaselineRatioIsLow, MultipleMeltPeaks		tetO-01	3A	24.2	77.14	2.04			tetO-01
tetPA	1A				NoAmplification		tetPA	1B				CurveFitFailed		tetPA	1C				NoAmplification		tetPA	2A				NoAmplification		tetPA	2B				NoAmplification		tetPA	2C				NoAmplification		tetPA	3A				NoAmplification		tetPA
tetPB-01	1A				NoAmplification		tetPB-01	1B				CtIsLarge, CurveFitFailed		tetPB-01	1C	32.2	88.55	1.9	CtIsLarge		tetPB-01	2A	36.14	87.63	1.91			tetPB-01	2B				CtIsLarge, CurveFitFailed		tetPB-01	2C				NoAmplification		tetPB-01	3A	37.34	83.5	1.87			tetPB-01
tetPB-02	1A	26.61	84.94	2.04			tetPB-02	1B	28.54	84.68	2.09	SaturationBaselineRatioIsLow		tetPB-02	1C	26.6	84.61	2.07			tetPB-02	2A	27.94	85.06	2.05			tetPB-02	2B	29.35	84.69	2.04			tetPB-02	2C	32.14	85.07	1.93			tetPB-02	3A	28.32	85.08	2.03			tetPB-02
tetPB-03	1A				BadR2, LowEfficiency, CtIsSmall, CurveFitFailed, HighBaseline		tetPB-03	1B				LowEfficiency, CtIsSmall, SaturationBaselineRatioIsLow, CurveFitFailed, HighBaseline		tetPB-03	1C				CurveFitFailed		tetPB-03	2A				NoAmplification		tetPB-03	2B				CurveFitFailed		tetPB-03	2C				NoAmplification		tetPB-03	3A				CurveFitFailed		tetPB-03
tetPB-05	1A				LowEfficiency, CtIsSmall, SaturationBaselineRatioIsLow, CurveFitFailed, HighBaseline		tetPB-05	1B				BadR2, LowEfficiency, CtIsSmall, SaturationBaselineRatioIsLow, CurveFitFailed, HighBaseline		tetPB-05	1C				LowEfficiency, CtIsSmall, SaturationBaselineRatioIsLow, CurveFitFailed		tetPB-05	2A				NoAmplification		tetPB-05	2B				CurveFitFailed		tetPB-05	2C				NoAmplification		tetPB-05	3A				CurveFitFailed		tetPB-05
tetQ	1A	26.31	75.82	2			tetQ	1B	30.1	75.55	2.04	CtIsLarge, SaturationBaselineRatioIsLow		tetQ	1C	21	75.96	2.12	SaturationBaselineRatioIsLow		tetQ	2A	25.88	76.28	2.08			tetQ	2B	21.44	77.17	2.11			tetQ	2C				NoAmplification		tetQ	3A	23.13	76.77	2.05			tetQ
tetR-02	1A	30.34	88.96	1.9	MultipleMeltPeaks		tetR-02	1B	31.98	87.3	2.01	CtIsLarge, SaturationBaselineRatioIsLow, MultipleMeltPeaks		tetR-02	1C	27.53	86.18	1.97	MultipleMeltPeaks		tetR-02	2A	28.04	89.7	1.83			tetR-02	2B	28.75	90.96	1.94	MultipleMeltPeaks		tetR-02	2C	35.43	85.18	1.79	MultipleMeltPeaks		tetR-02	3A	29.51	89.45	1.89			tetR-02
tetR-03	1A	23.2	76.23	1.97			tetR-03	1B	26.45	75.74	1.98	SaturationBaselineRatioIsLow		tetR-03	1C	17.87	76.22	2.03			tetR-03	2A				NoAmplification		tetR-03	2B	23.84	76.03	2.01	SaturationBaselineRatioIsLow		tetR-03	2C				NoAmplification		tetR-03	3A	24.83	76.27	2.01			tetR-03
tetS	1A				LowEfficiency, CtIsSmall, CurveFitFailed, HighBaseline		tetS	1B				CurveFitFailed		tetS	1C	33.14	87.96	2.21	CtIsLarge, SaturationBaselineRatioIsLow		tetS	2A	33.47	79.21	1.99	MultipleMeltPeaks		tetS	2B	32.86	85.64	1.93	CtIsLarge, SaturationBaselineRatioIsLow		tetS	2C				CurveFitFailed		tetS	3A				CtIsSmall, SaturationBaselineRatioIsLow, CurveFitFailed, HighBaseline		tetS
tetT	1A				NoAmplification		tetT	1B				LowEfficiency, CtIsSmall, CurveFitFailed, HighBaseline		tetT	1C				CtIsLarge, CurveFitFailed		tetT	2A				NoAmplification		tetT	2B				LowEfficiency, CtIsSmall, CurveFitFailed, HighBaseline		tetT	2C				NoAmplification		tetT	3A				NoAmplification		tetT
tetU-01	1A				NoAmplification		tetU-01	1B				LowEfficiency, CtIsSmall, CurveFitFailed, HighBaseline		tetU-01	1C				NoAmplification		tetU-01	2A				NoAmplification		tetU-01	2B				NoAmplification		tetU-01	2C				NoAmplification		tetU-01	3A				LowEfficiency, CtIsSmall, CurveFitFailed, HighBaseline		tetU-01
tetV	1A				CurveFitFailed		tetV	1B				LowEfficiency, CtIsSmall, CurveFitFailed, HighBaseline		tetV	1C				NoAmplification		tetV	2A				NoAmplification		tetV	2B				LowEfficiency, CtIsSmall, CurveFitFailed, HighBaseline		tetV	2C				NoAmplification		tetV	3A				CurveFitFailed		tetV
tetW-01	1A				CurveFitFailed		tetW-01	1B				CurveFitFailed		tetW-01	1C	28.1	81.34	2.01			tetW-01	2A				NoAmplification		tetW-01	2B	25.4	81.57	2.03			tetW-01	2C	28.44	81.62	1.97			tetW-01	3A	25.23	81.98	2.01			tetW-01
tetX	1A				BadR2, LowEfficiency, CtIsSmall, SaturationBaselineRatioIsLow, CurveFitFailed		tetX	1B				BadR2, LowEfficiency, CtIsSmall, SaturationBaselineRatioIsLow, CurveFitFailed		tetX	1C				CurveFitFailed		tetX	2A				BadR2, CtIsSmall, SaturationBaselineRatioIsLow, CurveFitFailed, HighBaseline		tetX	2B				CurveFitFailed		tetX	2C				NoAmplification		tetX	3A	35.68	81.32	1.82			tetX
tnpA-01	1A	42.34	79.58	2.54	BadR2		tnpA-01	1B				CurveFitFailed		tnpA-01	1C				LowEfficiency, CtIsLarge, CurveFitFailed		tnpA-01	2A	33.06	79.19	1.94	MultipleMeltPeaks		tnpA-01	2B	34.95	79.15	1.93	CtIsLarge, SaturationBaselineRatioIsLow		tnpA-01	2C				NoAmplification		tnpA-01	3A				LowEfficiency, CtIsSmall, SaturationBaselineRatioIsLow, CurveFitFailed, HighBaseline		tnpA-01
tnpA-02	1A	27.73	85.18	1.87			tnpA-02	1B				LowEfficiency, CtIsSmall, SaturationBaselineRatioIsLow, CurveFitFailed, HighBaseline		tnpA-02	1C	25.97	84.76	1.79	LowEfficiency		tnpA-02	2A	29.35	89.45	1.88			tnpA-02	2B				LowEfficiency, CtIsLarge, CurveFitFailed		tnpA-02	2C	34.89	84.9	1.72	MultipleMeltPeaks		tnpA-02	3A	31.89	85.92	1.79			tnpA-02
tnpA-03	1A	30.72	77.96	2.08			tnpA-03	1B				CurveFitFailed		tnpA-03	1C	26.65	77.96	2.1			tnpA-03	2A	29.97	77.95	2.08			tnpA-03	2B	34.99	73.92	1.86	CtIsLarge, MultipleMeltPeaks		tnpA-03	2C	39.89	73.88	1.87			tnpA-03	3A	28.86	77.86	2.17			tnpA-03
tnpA-04	1A	35.92	81.88	1.86			tnpA-04	1B				CurveFitFailed		tnpA-04	1C	28.6	82.21	1.94			tnpA-04	2A	36.37	85.62	1.76	MultipleMeltPeaks		tnpA-04	2B				CurveFitFailed		tnpA-04	2C				NoAmplification		tnpA-04	3A	29.39	82.41	1.94			tnpA-04
tnpA-05	1A	33.28	82.71	1.85	MultipleMeltPeaks		tnpA-05	1B	32.35	82.39	1.95	CtIsLarge		tnpA-05	1C				LowEfficiency, CtIsLarge, CurveFitFailed		tnpA-05	2A	28.77	80.81	1.89			tnpA-05	2B	28.31	80.7	1.94			tnpA-05	2C	38.17	77.14	1.69	MultipleMeltPeaks		tnpA-05	3A	28.57	81.02	1.97			tnpA-05
tnpA-07	1A	38.09	78.51	1.72			tnpA-07	1B				LowEfficiency, CtIsSmall, SaturationBaselineRatioIsLow, CurveFitFailed, HighBaseline		tnpA-07	1C				NoAmplification		tnpA-07	2A	25.58	76.84	1.98			tnpA-07	2B	27.73	76.46	2.03			tnpA-07	2C				NoAmplification		tnpA-07	3A				BadR2, LowEfficiency, CtIsSmall, CurveFitFailed, HighBaseline		tnpA-07
tolC-01	1A	34.41	80.25	1.86			tolC-01	1B				CurveFitFailed		tolC-01	1C				NoAmplification		tolC-01	2A	32.16	83.93	1.89	MultipleMeltPeaks		tolC-01	2B	32.63	88.81	1.84	CtIsLarge, SaturationBaselineRatioIsLow		tolC-01	2C	34.99	80.12	1.84			tolC-01	3A	33.14	86.4	1.88	MultipleMeltPeaks		tolC-01
tolC-02	1A	28.55	85.64	1.97	MultipleMeltPeaks		tolC-02	1B	33.77	83.48	1.94	CtIsLarge, SaturationBaselineRatioIsLow, MultipleMeltPeaks		tolC-02	1C	31.02	87.65	1.98	CtIsLarge, MultipleMeltPeaks		tolC-02	2A	26.11	93.48	1.99	MultipleMeltPeaks		tolC-02	2B	29.9	88.02	2.03	CtIsLarge, SaturationBaselineRatioIsLow		tolC-02	2C	30.66	85.54	1.95			tolC-02	3A	27.18	87.63	1.98	MultipleMeltPeaks		tolC-02
tolC-03	1A	29.23	86.18	1.94			tolC-03	1B	30.05	85.61	2.01	CtIsLarge, SaturationBaselineRatioIsLow		tolC-03	1C	30.41	85.02	1.99	CtIsLarge		tolC-03	2A	28.01	85.78	1.96	MultipleMeltPeaks		tolC-03	2B	29.92	87.62	2	CtIsLarge, SaturationBaselineRatioIsLow		tolC-03	2C	34.05	84.16	1.89			tolC-03	3A	27.98	86.61	1.97	MultipleMeltPeaks		tolC-03
Tp614	1A	29.87	83.59	1.91			Tp614	1B	31.94	83.52	1.94	CtIsLarge		Tp614	1C	33.31	72.78	1.95	CtIsLarge, MultipleMeltPeaks		Tp614	2A	32.56	86.77	2.01			Tp614	2B	30.37	83.31	1.98	CtIsLarge		Tp614	2C	33.24	77.43	1.95	MultipleMeltPeaks		Tp614	3A	32.42	83.85	1.97	MultipleMeltPeaks		Tp614
ttgA	1A				CurveFitFailed		ttgA	1B				LowEfficiency, CtIsSmall, CurveFitFailed, HighBaseline		ttgA	1C				CtIsLarge, CurveFitFailed		ttgA	2A	31.6	87.65	1.85			ttgA	2B	32.95	89.56	1.93	CtIsLarge, SaturationBaselineRatioIsLow		ttgA	2C	36.3	82.2	3.33	BadR2, HighEfficiency, MultipleMeltPeaks		ttgA	3A	37.67	86.72	1.89	MultipleMeltPeaks		ttgA
ttgB	1A	37.01	84.41	1.82			ttgB	1B				CurveFitFailed		ttgB	1C	29.81	83.5	1.95	CtIsLarge		ttgB	2A	33.34	84.44	2	MultipleMeltPeaks		ttgB	2B	34.93	91.13	1.96	CtIsLarge, SaturationBaselineRatioIsLow, MultipleMeltPeaks		ttgB	2C	38.14	75.61	1.77	MultipleMeltPeaks		ttgB	3A	33.04	88.48	1.95			ttgB
vanA	1A				NoAmplification		vanA	1B				LowEfficiency, CtIsSmall, SaturationBaselineRatioIsLow, CurveFitFailed, HighBaseline		vanA	1C				NoAmplification		vanA	2A				NoAmplification		vanA	2B				NoAmplification		vanA	2C				NoAmplification		vanA	3A				NoAmplification		vanA
vanB-01	1A	30.2	84.43	2.01			vanB-01	1B	30.72	83.76	2.11	CtIsLarge		vanB-01	1C	31.52	83.85	1.96	CtIsLarge, MultipleMeltPeaks		vanB-01	2A	30.39	83.93	2.12	MultipleMeltPeaks		vanB-01	2B	30.8	82.61	2.03	CtIsLarge, MultipleMeltPeaks		vanB-01	2C	36.43	81.07	1.8			vanB-01	3A	32.33	84.5	2.06			vanB-01
vanC-01	1A				CurveFitFailed		vanC-01	1B				LowEfficiency, CtIsSmall, CurveFitFailed, HighBaseline		vanC-01	1C				NoAmplification		vanC-01	2A	34.91	73.3	2.14			vanC-01	2B				LowEfficiency, CtIsSmall, CurveFitFailed, HighBaseline		vanC-01	2C				CurveFitFailed		vanC-01	3A	36.34	76.53	1.97			vanC-01
vanC-02	1A				CurveFitFailed		vanC-02	1B				LowEfficiency, CtIsSmall, SaturationBaselineRatioIsLow, CurveFitFailed, HighBaseline		vanC-02	1C				CurveFitFailed		vanC-02	2A				NoAmplification		vanC-02	2B				BadR2, LowEfficiency, CtIsSmall, CurveFitFailed, HighBaseline		vanC-02	2C				NoAmplification		vanC-02	3A				CurveFitFailed		vanC-02
vanC-03	1A	24.54	85.22	1.99			vanC-03	1B	27.33	88.65	2.1	SaturationBaselineRatioIsLow, MultipleMeltPeaks		vanC-03	1C	21.62	85.64	2	MultipleMeltPeaks		vanC-03	2A	23.32	85.98	1.94	MultipleMeltPeaks		vanC-03	2B	25.72	90.84	2.01			vanC-03	2C	28.49	86.19	1.89			vanC-03	3A	24.95	85.95	1.95			vanC-03
vanC1	1A				LowEfficiency, CtIsSmall, CurveFitFailed, HighBaseline		vanC1	1B				CtIsLarge, CurveFitFailed		vanC1	1C				CurveFitFailed		vanC1	2A				NoAmplification		vanC1	2B	33.3	84.16	1.91	CtIsLarge		vanC1	2C				NoAmplification		vanC1	3A				CurveFitFailed		vanC1
vanC2/vanC3	1A	31.69	82.91	2.09	MultipleMeltPeaks		vanC2/vanC3	1B				CurveFitFailed		vanC2/vanC3	1C	31.45	83.42	1.88	CtIsLarge, MultipleMeltPeaks		vanC2/vanC3	2A	31.09	82.25	1.85			vanC2/vanC3	2B	33.64	85.06	1.93	CtIsLarge, SaturationBaselineRatioIsLow, MultipleMeltPeaks		vanC2/vanC3	2C				CurveFitFailed		vanC2/vanC3	3A	31.1	84.52	2.08			vanC2/vanC3
vanG	1A				CurveFitFailed		vanG	1B				LowEfficiency, CtIsSmall, CurveFitFailed, HighBaseline		vanG	1C				LowEfficiency, CtIsSmall, CurveFitFailed, HighBaseline		vanG	2A				NoAmplification		vanG	2B				LowEfficiency, CtIsSmall, CurveFitFailed, HighBaseline		vanG	2C				NoAmplification		vanG	3A				BadR2, CtIsSmall, SaturationBaselineRatioIsLow, CurveFitFailed, HighBaseline		vanG
vanHB	1A	36.21	78.04	1.91			vanHB	1B				LowEfficiency, CtIsSmall, SaturationBaselineRatioIsLow, CurveFitFailed, HighBaseline		vanHB	1C	33.2	84.09	1.95	CtIsLarge, SaturationBaselineRatioIsLow, MultipleMeltPeaks		vanHB	2A	36.44	79.21	1.89			vanHB	2B	33.14	89.79	1.95	CtIsLarge, MultipleMeltPeaks		vanHB	2C				NoAmplification		vanHB	3A	37.73	82.75	1.76	MultipleMeltPeaks		vanHB
vanHD	1A	34.24	82.93	1.91	MultipleMeltPeaks		vanHD	1B				CurveFitFailed		vanHD	1C	29.88	89.89	1.91	CtIsLarge, SaturationBaselineRatioIsLow		vanHD	2A	31.73	83.5	1.94			vanHD	2B				LowEfficiency, CtIsLarge, CurveFitFailed		vanHD	2C	35.73	81.07	1.86			vanHD	3A	33.48	88.38	1.93	MultipleMeltPeaks		vanHD
vanRA-01	1A				CurveFitFailed		vanRA-01	1B				LowEfficiency, CtIsSmall, CurveFitFailed, HighBaseline		vanRA-01	1C				NoAmplification		vanRA-01	2A				NoAmplification		vanRA-01	2B				NoAmplification		vanRA-01	2C				NoAmplification		vanRA-01	3A				LowEfficiency, CtIsSmall, CurveFitFailed, HighBaseline		vanRA-01
vanRA-02	1A	36.3	82.15	1.71	MultipleMeltPeaks		vanRA-02	1B				NoAmplification		vanRA-02	1C				NoAmplification		vanRA-02	2A	36.21	81.45	1.8			vanRA-02	2B	33.72	84.1	1.88	CtIsLarge, SaturationBaselineRatioIsLow		vanRA-02	2C				CurveFitFailed		vanRA-02	3A				NoAmplification		vanRA-02
vanRB	1A	31.36	87.63	1.92			vanRB	1B	32.57	87.21	2.04	CtIsLarge, SaturationBaselineRatioIsLow		vanRB	1C	29.65	81.65	2.23	CtIsLarge, SaturationBaselineRatioIsLow, MultipleMeltPeaks		vanRB	2A	29.58	87.5	2.01			vanRB	2B	31.91	87.1	1.91	CtIsLarge, SaturationBaselineRatioIsLow		vanRB	2C	30.61	87.52	1.87			vanRB	3A	31.09	87.64	1.94			vanRB
vanRC	1A				NoAmplification		vanRC	1B				LowEfficiency, CtIsSmall, CurveFitFailed, HighBaseline		vanRC	1C				LowEfficiency, CtIsSmall, CurveFitFailed, HighBaseline		vanRC	2A				NoAmplification		vanRC	2B				NoAmplification		vanRC	2C				NoAmplification		vanRC	3A				LowEfficiency, CtIsSmall, SaturationBaselineRatioIsLow, CurveFitFailed, HighBaseline		vanRC
vanRC4	1A				CurveFitFailed		vanRC4	1B				LowEfficiency, CtIsSmall, CurveFitFailed, HighBaseline		vanRC4	1C				LowEfficiency, CtIsSmall, CurveFitFailed, HighBaseline		vanRC4	2A				NoAmplification		vanRC4	2B				NoAmplification		vanRC4	2C				NoAmplification		vanRC4	3A				LowEfficiency, CtIsSmall, SaturationBaselineRatioIsLow, CurveFitFailed, HighBaseline		vanRC4
vanRD	1A				NoAmplification		vanRD	1B				LowEfficiency, CtIsSmall, CurveFitFailed, HighBaseline		vanRD	1C				NoAmplification		vanRD	2A				NoAmplification		vanRD	2B				NoAmplification		vanRD	2C				NoAmplification		vanRD	3A				BadR2, CtIsSmall, SaturationBaselineRatioIsLow, CurveFitFailed, HighBaseline		vanRD
vanSA	1A				LowEfficiency, CtIsSmall, SaturationBaselineRatioIsLow, CurveFitFailed, HighBaseline		vanSA	1B				CurveFitFailed		vanSA	1C				LowEfficiency, CtIsSmall, SaturationBaselineRatioIsLow, CurveFitFailed, HighBaseline		vanSA	2A				NoAmplification		vanSA	2B				LowEfficiency, CtIsSmall, SaturationBaselineRatioIsLow, CurveFitFailed, HighBaseline		vanSA	2C				NoAmplification		vanSA	3A				LowEfficiency, CtIsSmall, SaturationBaselineRatioIsLow, CurveFitFailed, HighBaseline		vanSA
vanSB	1A	28.18	75.12	2.1			vanSB	1B	27.78	74.52	2.08			vanSB	1C	28.5	74.77	2.06			vanSB	2A	29.93	74.77	1.97			vanSB	2B	28.71	74.69	2			vanSB	2C	28.41	74.92	2.08			vanSB	3A	28.03	75.21	2.08			vanSB
vanSC-01	1A	32.63	84.29	2.01			vanSC-01	1B	32.23	83.84	1.98	CtIsLarge		vanSC-01	1C	33.07	77.09	1.96	CtIsLarge, MultipleMeltPeaks		vanSC-01	2A	31.47	84.25	1.97			vanSC-01	2B	29.8	83.86	2.09	CtIsLarge		vanSC-01	2C	34.17	84.07	1.92			vanSC-01	3A	32.36	84.23	2			vanSC-01
vanSC-02	1A				NoAmplification		vanSC-02	1B				NoAmplification		vanSC-02	1C				NoAmplification		vanSC-02	2A				NoAmplification		vanSC-02	2B				NoAmplification		vanSC-02	2C				NoAmplification		vanSC-02	3A				NoAmplification		vanSC-02
vanTC-01	1A				CurveFitFailed		vanTC-01	1B				CurveFitFailed		vanTC-01	1C				LowEfficiency, CtIsSmall, CurveFitFailed, HighBaseline		vanTC-01	2A				NoAmplification		vanTC-01	2B				LowEfficiency, CtIsSmall, CurveFitFailed, HighBaseline		vanTC-01	2C				NoAmplification		vanTC-01	3A				LowEfficiency, CtIsSmall, SaturationBaselineRatioIsLow, CurveFitFailed, HighBaseline		vanTC-01
vanTC-02	1A	31.32	87.48	1.8			vanTC-02	1B				LowEfficiency, CtIsSmall, SaturationBaselineRatioIsLow, CurveFitFailed		vanTC-02	1C	29.69	86.7	1.79	LowEfficiency, CtIsLarge		vanTC-02	2A	36.83	82.76	1.78			vanTC-02	2B	31.35	88.3	1.94	CtIsLarge		vanTC-02	2C	38.33	86.16	1.61	MultipleMeltPeaks		vanTC-02	3A	34.24	86.64	1.77			vanTC-02
vanTE	1A	39.13	78.25	1.68	MultipleMeltPeaks		vanTE	1B				CurveFitFailed		vanTE	1C				LowEfficiency, CtIsLarge, CurveFitFailed		vanTE	2A	35.01	88.41	1.79	MultipleMeltPeaks		vanTE	2B				CurveFitFailed		vanTE	2C				NoAmplification		vanTE	3A	33.87	88.64	1.86			vanTE
vanTG	1A	36.09	74.23	2.16			vanTG	1B	31.14	74.86	2	CtIsLarge, SaturationBaselineRatioIsLow		vanTG	1C				NoAmplification		vanTG	2A				BadR2, CtIsSmall, SaturationBaselineRatioIsLow, CurveFitFailed, HighBaseline		vanTG	2B				LowEfficiency, CtIsSmall, CurveFitFailed, HighBaseline		vanTG	2C				NoAmplification		vanTG	3A				BadR2, CtIsSmall, SaturationBaselineRatioIsLow, CurveFitFailed, HighBaseline		vanTG
vanWB	1A				LowEfficiency, CtIsSmall, SaturationBaselineRatioIsLow, CurveFitFailed, HighBaseline		vanWB	1B				LowEfficiency, CtIsSmall, SaturationBaselineRatioIsLow, CurveFitFailed, HighBaseline		vanWB	1C				NoAmplification		vanWB	2A				NoAmplification		vanWB	2B				CurveFitFailed		vanWB	2C				NoAmplification		vanWB	3A				LowEfficiency, CtIsSmall, SaturationBaselineRatioIsLow, CurveFitFailed, HighBaseline		vanWB
vanWG	1A				CurveFitFailed		vanWG	1B				CtIsLarge, CurveFitFailed		vanWG	1C				LowEfficiency, CtIsLarge, CurveFitFailed		vanWG	2A				NoAmplification		vanWG	2B	32.31	74.73	2.01	CtIsLarge		vanWG	2C				NoAmplification		vanWG	3A				LowEfficiency, CtIsSmall, SaturationBaselineRatioIsLow, CurveFitFailed, HighBaseline		vanWG
vanXA	1A	38.48	83.59	1.74	MultipleMeltPeaks		vanXA	1B				CurveFitFailed		vanXA	1C				CurveFitFailed		vanXA	2A	34.6	77.53	1.95			vanXA	2B	32.91	78.61	2.01	CtIsLarge		vanXA	2C				CurveFitFailed		vanXA	3A				CurveFitFailed		vanXA
vanXB	1A				LowEfficiency, CtIsSmall, SaturationBaselineRatioIsLow, CurveFitFailed, HighBaseline		vanXB	1B				LowEfficiency, CtIsSmall, SaturationBaselineRatioIsLow, CurveFitFailed, HighBaseline		vanXB	1C				NoAmplification		vanXB	2A				NoAmplification		vanXB	2B				NoAmplification		vanXB	2C				NoAmplification		vanXB	3A				LowEfficiency, CtIsSmall, SaturationBaselineRatioIsLow, CurveFitFailed, HighBaseline		vanXB
vanXD	1A	28.68	76.4	2.1			vanXD	1B	29.51	75.21	2	CtIsLarge, SaturationBaselineRatioIsLow		vanXD	1C	29.78	75.52	2	CtIsLarge		vanXD	2A	29.79	76.29	2.03			vanXD	2B	29.47	75	2.03			vanXD	2C	28.61	76.41	2.1			vanXD	3A	28.47	76.19	2.12			vanXD
vanYB	1A	34.88	85.61	1.89	MultipleMeltPeaks		vanYB	1B				CurveFitFailed		vanYB	1C				CtIsLarge, CurveFitFailed		vanYB	2A	36.07	86.09	1.9	MultipleMeltPeaks		vanYB	2B				CtIsLarge, CurveFitFailed		vanYB	2C				CurveFitFailed		vanYB	3A	35.29	81.15	1.9	MultipleMeltPeaks		vanYB
vanYD-01	1A	30.19	89.47	1.86			vanYD-01	1B	31.58	81.17	1.89	CtIsLarge, MultipleMeltPeaks		vanYD-01	1C	30.94	88.29	1.72	LowEfficiency, CtIsLarge		vanYD-01	2A	29.18	83.32	1.89	MultipleMeltPeaks		vanYD-01	2B	30.66	83.91	1.84	CtIsLarge, MultipleMeltPeaks		vanYD-01	2C	39.07	80.83	1.65			vanYD-01	3A	32.05	82.38	1.82	MultipleMeltPeaks		vanYD-01
vanYD-02	1A	33.82	74.45	2.01	MultipleMeltPeaks		vanYD-02	1B				LowEfficiency, CtIsSmall, SaturationBaselineRatioIsLow, CurveFitFailed, HighBaseline		vanYD-02	1C				CurveFitFailed		vanYD-02	2A	37.96	79.99	1.93	MultipleMeltPeaks		vanYD-02	2B				CtIsLarge, CurveFitFailed		vanYD-02	2C				NoAmplification		vanYD-02	3A				CurveFitFailed		vanYD-02
vatB-01	1A				CurveFitFailed		vatB-01	1B				NoAmplification		vatB-01	1C				NoAmplification		vatB-01	2A				NoAmplification		vatB-01	2B	34.22	74.97	1.95	CtIsLarge		vatB-01	2C				NoAmplification		vatB-01	3A				CurveFitFailed		vatB-01
vatB-02	1A	37.85	78.34	1.81			vatB-02	1B				CurveFitFailed		vatB-02	1C				BadR2, LowEfficiency, CtIsSmall, SaturationBaselineRatioIsLow, CurveFitFailed, HighBaseline		vatB-02	2A	37.49	80.63	1.91	MultipleMeltPeaks		vatB-02	2B				NoAmplification		vatB-02	2C				NoAmplification		vatB-02	3A	30.88	75.72	2.11			vatB-02
vatC-01	1A				LowEfficiency, CtIsSmall, CurveFitFailed, HighBaseline		vatC-01	1B				LowEfficiency, CtIsSmall, SaturationBaselineRatioIsLow, CurveFitFailed, HighBaseline		vatC-01	1C	32.51	83.5	1.81	CtIsLarge, SaturationBaselineRatioIsLow, MultipleMeltPeaks		vatC-01	2A	31.82	81.32	1.89			vatC-01	2B	31.13	81.32	1.84	CtIsLarge, SaturationBaselineRatioIsLow		vatC-01	2C				CurveFitFailed		vatC-01	3A	35.99	81.19	1.83			vatC-01
vatC-02	1A	33.32	88.74	1.86			vatC-02	1B				BadR2, LowEfficiency, CtIsSmall, SaturationBaselineRatioIsLow, CurveFitFailed, HighBaseline		vatC-02	1C	32.89	86.22	1.92	CtIsLarge		vatC-02	2A	31.48	87.49	1.94			vatC-02	2B	33.38	86.34	1.91	CtIsLarge, SaturationBaselineRatioIsLow		vatC-02	2C				CurveFitFailed		vatC-02	3A	35.74	83.15	1.86	MultipleMeltPeaks		vatC-02
vatE-01	1A	26.04	77.75	2.13			vatE-01	1B	30.94	77.1	1.95	CtIsLarge, SaturationBaselineRatioIsLow		vatE-01	1C	28.99	77.31	2.13			vatE-01	2A	27.54	77.68	2.01			vatE-01	2B	29.81	76.9	1.93	CtIsLarge, SaturationBaselineRatioIsLow		vatE-01	2C	26.15	77.84	2.1			vatE-01	3A	26.32	77.85	2.11			vatE-01
vatE-02	1A	37.13	75.6	2			vatE-02	1B				CurveFitFailed		vatE-02	1C				NoAmplification		vatE-02	2A	35.34	86.71	1.99			vatE-02	2B				CtIsLarge, SaturationBaselineRatioIsLow, CurveFitFailed		vatE-02	2C				NoAmplification		vatE-02	3A				NoAmplification		vatE-02
vgaA-01	1A				CurveFitFailed		vgaA-01	1B				LowEfficiency, CtIsSmall, CurveFitFailed, HighBaseline		vgaA-01	1C				CurveFitFailed		vgaA-01	2A				NoAmplification		vgaA-01	2B	33.74	83.25	1.91	CtIsLarge, MultipleMeltPeaks		vgaA-01	2C				NoAmplification		vgaA-01	3A				CurveFitFailed		vgaA-01
vgaA-02	1A	35.54	81.02	1.84			vgaA-02	1B				CurveFitFailed		vgaA-02	1C				LowEfficiency, CtIsSmall, SaturationBaselineRatioIsLow, CurveFitFailed, HighBaseline		vgaA-02	2A	33.97	81.29	1.89	MultipleMeltPeaks		vgaA-02	2B				CtIsLarge, CurveFitFailed		vgaA-02	2C				CurveFitFailed		vgaA-02	3A				CurveFitFailed		vgaA-02
vgb-01	1A	32.52	87.26	1.9			vgb-01	1B				LowEfficiency, CtIsLarge, CurveFitFailed		vgb-01	1C	34.53	84.07	1.87	CtIsLarge, MultipleMeltPeaks		vgb-01	2A	36.02	87.13	1.83	MultipleMeltPeaks		vgb-01	2B	33.76	87.17	1.89	CtIsLarge		vgb-01	2C				CurveFitFailed		vgb-01	3A	31	90.34	1.95	MultipleMeltPeaks		vgb-01
vgbB-01	1A	36.1	75.9	1.77	MultipleMeltPeaks		vgbB-01	1B				BadR2, LowEfficiency, CtIsSmall, SaturationBaselineRatioIsLow, CurveFitFailed, HighBaseline		vgbB-01	1C				LowEfficiency, CtIsLarge, CurveFitFailed		vgbB-01	2A	34.24	86.8	1.76	MultipleMeltPeaks		vgbB-01	2B				LowEfficiency, CtIsLarge, CurveFitFailed		vgbB-01	2C	37.44	76.28	1.7			vgbB-01	3A	36.67	75.99	1.76	MultipleMeltPeaks		vgbB-01
vgbB-02	1A	34.24	73.07	2.04			vgbB-02	1B				CurveFitFailed		vgbB-02	1C				NoAmplification		vgbB-02	2A	37.45	79.16	1.66			vgbB-02	2B				LowEfficiency, CtIsSmall, CurveFitFailed, HighBaseline		vgbB-02	2C				NoAmplification		vgbB-02	3A				NoAmplification		vgbB-02
yceE/mdtG-01	1A	36.27	81.23	1.86	MultipleMeltPeaks		yceE/mdtG-01	1B				CurveFitFailed		yceE/mdtG-01	1C				CurveFitFailed		yceE/mdtG-01	2A	32.3	81.17	2.14			yceE/mdtG-01	2B				LowEfficiency, CtIsSmall, CurveFitFailed, HighBaseline		yceE/mdtG-01	2C				CurveFitFailed		yceE/mdtG-01	3A	32.94	77.45	2.12			yceE/mdtG-01
yceE/mdtG-02	1A	30.17	81.05	2.01			yceE/mdtG-02	1B				LowEfficiency, CtIsLarge, CurveFitFailed		yceE/mdtG-02	1C				CtIsLarge, CurveFitFailed		yceE/mdtG-02	2A	35.81	81.57	1.85			yceE/mdtG-02	2B	34.6	80.84	1.95	CtIsLarge		yceE/mdtG-02	2C	38.87	81.21	1.76			yceE/mdtG-02	3A	35.08	81.13	1.91			yceE/mdtG-02
yceL/mdtH-01	1A	27.96	85.73	1.98			yceL/mdtH-01	1B	31.53	84.86	2.05	CtIsLarge, SaturationBaselineRatioIsLow		yceL/mdtH-01	1C	31.88	84.76	1.93	CtIsLarge		yceL/mdtH-01	2A	28.01	86.21	2.04			yceL/mdtH-01	2B				CtIsLarge, CurveFitFailed		yceL/mdtH-01	2C	30.51	86.33	1.89			yceL/mdtH-01	3A	28.74	86.34	1.88			yceL/mdtH-01
yceL/mdtH-02	1A				LowEfficiency, CtIsSmall, CurveFitFailed, HighBaseline		yceL/mdtH-02	1B				CurveFitFailed		yceL/mdtH-02	1C				NoAmplification		yceL/mdtH-02	2A				NoAmplification		yceL/mdtH-02	2B				LowEfficiency, CtIsSmall, CurveFitFailed, HighBaseline		yceL/mdtH-02	2C	38.34	80.38	1.77	MultipleMeltPeaks		yceL/mdtH-02	3A				CurveFitFailed		yceL/mdtH-02
yceL/mdtH-03	1A	29.82	81.3	1.95			yceL/mdtH-03	1B	32.23	81.71	1.95	CtIsLarge, SaturationBaselineRatioIsLow		yceL/mdtH-03	1C	30.21	80.98	1.92	CtIsLarge		yceL/mdtH-03	2A	31.21	87.09	1.98			yceL/mdtH-03	2B	33.94	86.88	1.9	CtIsLarge, MultipleMeltPeaks		yceL/mdtH-03	2C	34.42	76.5	1.97	MultipleMeltPeaks		yceL/mdtH-03	3A	29.96	87.49	1.98			yceL/mdtH-03
yidY/mdtL-01	1A	27.86	85.39	1.96			yidY/mdtL-01	1B	29.21	82.8	1.99			yidY/mdtL-01	1C	30.5	82.36	1.97	CtIsLarge, MultipleMeltPeaks		yidY/mdtL-01	2A	26.88	88.7	2.01	MultipleMeltPeaks		yidY/mdtL-01	2B	30.55	85.52	2	CtIsLarge		yidY/mdtL-01	2C	30.1	83.34	1.95			yidY/mdtL-01	3A	28	88.66	1.94			yidY/mdtL-01
yidY/mdtL-02	1A	37.43	78.8	1.76	MultipleMeltPeaks		yidY/mdtL-02	1B				LowEfficiency, CtIsSmall, CurveFitFailed, HighBaseline		yidY/mdtL-02	1C				LowEfficiency, CtIsLarge, CurveFitFailed		yidY/mdtL-02	2A				NoAmplification		yidY/mdtL-02	2B	33.99	92.45	1.82	CtIsLarge, SaturationBaselineRatioIsLow		yidY/mdtL-02	2C	38.33	74.78	1.76	MultipleMeltPeaks		yidY/mdtL-02	3A	33.08	92.88	1.89			yidY/mdtL-02
[truncated: 947 more columns]

## Sheet: EXCEED
Assay	Sample	Ct	Tm	Efficiency	Flags		Assay	Sample	Ct	Tm	Efficiency	Flags		Assay	Sample	Ct	Tm	Efficiency	Flags		Assay	Sample	Ct	Tm	Efficiency	Flags		Assay	Sample	Ct	Tm	Efficiency	Flags		Assay	Sample	Ct	Tm	Efficiency	Flags		Assay	Sample	Ct	Tm	Efficiency	Flags		Assay
16S rRNA	C1	16.47	81.99	1.95			16S rRNA	C2	20.53	82	1.97			16S rRNA	C3	24.37	81.99	1.99			16S rRNA	C4	18.62	82.1	1.97			16S rRNA	C5	20.97	82.05	1.94			16S rRNA	C6	20.01	82.2	1.96			16S rRNA	C8	17.15	82.21	2.01			16S rRNA
aac	C1	31.86	81.87	1.93			aac	C2				NoAmplification		aac	C3	33.16	90.39	1.59			aac	C4	31.2	80.71	1.73	MultipleMeltPeaks		aac	C5	36.32	77.5	1.86			aac	C6	30.09	81.03	1.38	MultipleMeltPeaks		aac	C8	29.95	83.13	1.69	MultipleMeltPeaks		aac
aac(6')-Ib(aka aacA4)-01	C1				NoAmplification		aac(6')-Ib(aka aacA4)-01	C2				NoAmplification		aac(6')-Ib(aka aacA4)-01	C3				NoAmplification		aac(6')-Ib(aka aacA4)-01	C4	32.31	83.8	1.96			aac(6')-Ib(aka aacA4)-01	C5				NoAmplification		aac(6')-Ib(aka aacA4)-01	C6				NoAmplification		aac(6')-Ib(aka aacA4)-01	C8				CurveFitFailed		aac(6')-Ib(aka aacA4)-01
aac(6')-Ib(aka aacA4)-02	C1	33.03	80.12	1.99			aac(6')-Ib(aka aacA4)-02	C2				CurveFitFailed		aac(6')-Ib(aka aacA4)-02	C3	30.6	79.37	1.97	MultipleMeltPeaks		aac(6')-Ib(aka aacA4)-02	C4	29.79	81.61	1.97			aac(6')-Ib(aka aacA4)-02	C5	33.63	80.67	1.98	MultipleMeltPeaks		aac(6')-Ib(aka aacA4)-02	C6	31.71	80.83	1.96			aac(6')-Ib(aka aacA4)-02	C8	33.82	85.58	1.99	MultipleMeltPeaks		aac(6')-Ib(aka aacA4)-02
aac(6')-Ib(aka aacA4)-03	C1	32.55	78.85	1.99			aac(6')-Ib(aka aacA4)-03	C2				NoAmplification		aac(6')-Ib(aka aacA4)-03	C3				NoAmplification		aac(6')-Ib(aka aacA4)-03	C4	32.95	78.82	1.99			aac(6')-Ib(aka aacA4)-03	C5	35.75	77.76	1.94			aac(6')-Ib(aka aacA4)-03	C6	36.34	86.04	1.87	MultipleMeltPeaks		aac(6')-Ib(aka aacA4)-03	C8	33.45	78.67	1.98	MultipleMeltPeaks		aac(6')-Ib(aka aacA4)-03
aac(6')-II	C1	32.87	81.13	1.94	MultipleMeltPeaks		aac(6')-II	C2				NoAmplification		aac(6')-II	C3	37.25	81.42	1.63	MultipleMeltPeaks		aac(6')-II	C4	30.99	83.1	1.85			aac(6')-II	C5	37.84	81.25	1.57	MultipleMeltPeaks		aac(6')-II	C6	31.81	88.75	1.87	MultipleMeltPeaks		aac(6')-II	C8	35.55	81.12	1.69	MultipleMeltPeaks		aac(6')-II
aac(6')I1	C1	38.01	85.44	1.85	MultipleMeltPeaks		aac(6')I1	C2				NoAmplification		aac(6')I1	C3				NoAmplification		aac(6')I1	C4	37.51	88.25	1.83			aac(6')I1	C5	37.54	63.4	1.9	MultipleMeltPeaks		aac(6')I1	C6				NoAmplification		aac(6')I1	C8	37.13	88.47	1.83			aac(6')I1
aacA/aphD	C1				NoAmplification		aacA/aphD	C2				NoAmplification		aacA/aphD	C3				NoAmplification		aacA/aphD	C4				NoAmplification		aacA/aphD	C5				NoAmplification		aacA/aphD	C6				NoAmplification		aacA/aphD	C8				LowEfficiency, CtIsSmall, SaturationBaselineRatioIsLow, CurveFitFailed, HighBaseline		aacA/aphD
aacC	C1	27.6	87.79	1.89	MultipleMeltPeaks		aacC	C2	30.57	86.69	1.81			aacC	C3	31.98	92.32	1.81	MultipleMeltPeaks		aacC	C4	29.59	91.87	1.94			aacC	C5	30.78	87.41	1.87			aacC	C6	31.24	91.96	1.98	MultipleMeltPeaks		aacC	C8	30.94	85.83	1.97	MultipleMeltPeaks		aacC
aacC1	C1				CurveFitFailed		aacC1	C2				NoAmplification		aacC1	C3				NoAmplification		aacC1	C4				NoAmplification		aacC1	C5				NoAmplification		aacC1	C6				NoAmplification		aacC1	C8	36.92	84.03	1.99			aacC1
aacC2	C1				NoAmplification		aacC2	C2				NoAmplification		aacC2	C3				NoAmplification		aacC2	C4				NoAmplification		aacC2	C5	37.92	82.05	1.81			aacC2	C6	39.56	82.37	1.71	MultipleMeltPeaks		aacC2	C8	36.88	81.8	1.94			aacC2
aacC4	C1	32.58	89.48	1.97	MultipleMeltPeaks		aacC4	C2	30.77	88.33	1.8			aacC4	C3	35.72	83.76	1.91	MultipleMeltPeaks		aacC4	C4	35.31	87.37	1.88	MultipleMeltPeaks		aacC4	C5				NoAmplification		aacC4	C6	34.83	83.62	1.94			aacC4	C8	31.09	89.79	1.96	MultipleMeltPeaks		aacC4
aadA-01	C1	38.87	61.55	1.66	MultipleMeltPeaks		aadA-01	C2				NoAmplification		aadA-01	C3				NoAmplification		aadA-01	C4				NoAmplification		aadA-01	C5				NoAmplification		aadA-01	C6				NoAmplification		aadA-01	C8				CurveFitFailed		aadA-01
aadA-02	C1	33.74	80.46	1.95			aadA-02	C2				NoAmplification		aadA-02	C3	39.72	80.82	1.76	MultipleMeltPeaks		aadA-02	C4	35.32	80.53	1.93			aadA-02	C5	35.11	80.52	1.92			aadA-02	C6	34.8	80.88	1.95			aadA-02	C8	32.56	80.45	1.99			aadA-02
aadA-1-01	C1	35.63	81.41	1.94	MultipleMeltPeaks		aadA-1-01	C2				NoAmplification		aadA-1-01	C3				NoAmplification		aadA-1-01	C4	35.11	81.24	1.95	MultipleMeltPeaks		aadA-1-01	C5	35.81	77.13	1.97			aadA-1-01	C6	28.21	81.53	1.93			aadA-1-01	C8	36.81	80.72	2.08			aadA-1-01
aadA-1-02	C1				NoAmplification		aadA-1-02	C2				NoAmplification		aadA-1-02	C3				NoAmplification		aadA-1-02	C4				NoAmplification		aadA-1-02	C5				NoAmplification		aadA-1-02	C6				NoAmplification		aadA-1-02	C8				LowEfficiency, CtIsSmall, SaturationBaselineRatioIsLow, CurveFitFailed, HighBaseline		aadA-1-02
aadA1	C1	32.68	85.5	2.01			aadA1	C2	40.07	82.85	1.75			aadA1	C3	35.14	83.23	1.93	MultipleMeltPeaks		aadA1	C4	32.06	83.48	1.99			aadA1	C5	33.36	84.11	2.03			aadA1	C6	32.29	83.25	2.04			aadA1	C8	32.23	84.21	2.01			aadA1
aadA2-01	C1	38.27	82.02	1.65	MultipleMeltPeaks		aadA2-01	C2				NoAmplification		aadA2-01	C3				NoAmplification		aadA2-01	C4	34.59	89.16	1.81			aadA2-01	C5				NoAmplification		aadA2-01	C6	38.49	63.88	1.71	MultipleMeltPeaks		aadA2-01	C8				CurveFitFailed		aadA2-01
aadA2-02	C1	33.15	75.39	1.98			aadA2-02	C2	35.34	74.7	1.95			aadA2-02	C3	32.91	75.53	2.08			aadA2-02	C4	31.93	75.43	2.07			aadA2-02	C5	32.22	75.56	2.04			aadA2-02	C6	31.35	75.64	2			aadA2-02	C8	33.19	75.41	2.04			aadA2-02
aadA2-03	C1				NoAmplification		aadA2-03	C2				NoAmplification		aadA2-03	C3				NoAmplification		aadA2-03	C4	35.94	81.65	1.86	MultipleMeltPeaks		aadA2-03	C5				NoAmplification		aadA2-03	C6				NoAmplification		aadA2-03	C8				LowEfficiency, CtIsSmall, SaturationBaselineRatioIsLow, CurveFitFailed, HighBaseline		aadA2-03
aadA5-01	C1	36.85	88.81	1.77			aadA5-01	C2				NoAmplification		aadA5-01	C3	37.23	78.99	1.77	MultipleMeltPeaks		aadA5-01	C4	33.81	88.86	1.9			aadA5-01	C5	37.43	88.99	1.74	MultipleMeltPeaks		aadA5-01	C6	33.71	78.11	1.96	MultipleMeltPeaks		aadA5-01	C8	37.08	81.42	1.87	MultipleMeltPeaks		aadA5-01
aadA5-02	C1	32.82	77.79	1.96	MultipleMeltPeaks		aadA5-02	C2				NoAmplification		aadA5-02	C3	35.47	83.26	1.9			aadA5-02	C4	35.15	84.08	1.9	MultipleMeltPeaks		aadA5-02	C5	37.19	78.24	1.8	MultipleMeltPeaks		aadA5-02	C6	31.38	83.28	1.99			aadA5-02	C8	34.86	83.94	1.96			aadA5-02
aadA9-01	C1				CurveFitFailed		aadA9-01	C2	36.28	61.69	3.17	HighEfficiency, SaturationBaselineRatioIsLow, MultipleMeltPeaks		aadA9-01	C3	37.2	62.22	2.18	MultipleMeltPeaks		aadA9-01	C4	36.92	78.4	2.29	MultipleMeltPeaks		aadA9-01	C5				NoAmplification		aadA9-01	C6	36.85	87.71	1.86	MultipleMeltPeaks		aadA9-01	C8	30.61	89.55	1.89			aadA9-01
aadA9-02	C1	31.31	80.36	1.95			aadA9-02	C2	37.61	75.24	2.01			aadA9-02	C3				NoAmplification		aadA9-02	C4				NoAmplification		aadA9-02	C5				NoAmplification		aadA9-02	C6				NoAmplification		aadA9-02	C8				CurveFitFailed		aadA9-02
aadD	C1				NoAmplification		aadD	C2				NoAmplification		aadD	C3				NoAmplification		aadD	C4				NoAmplification		aadD	C5				NoAmplification		aadD	C6				NoAmplification		aadD	C8				LowEfficiency, CtIsSmall, SaturationBaselineRatioIsLow, CurveFitFailed, HighBaseline		aadD
aadE	C1	39.11	73.25	1.8			aadE	C2				NoAmplification		aadE	C3	34.07	71.98	2.08			aadE	C4	38.14	71.79	1.97			aadE	C5				NoAmplification		aadE	C6				NoAmplification		aadE	C8				LowEfficiency, CtIsSmall, SaturationBaselineRatioIsLow, CurveFitFailed, HighBaseline		aadE
acrA-01	C1	32.01	88.7	1.86			acrA-01	C2	36.01	83.48	1.86			acrA-01	C3	31.91	88.81	1.95			acrA-01	C4	30.91	88.85	1.93			acrA-01	C5	32.92	84.09	1.95	MultipleMeltPeaks		acrA-01	C6	31.25	88.86	1.91			acrA-01	C8	31.69	88.86	1.97			acrA-01
acrA-02	C1	30.8	88.29	1.92			acrA-02	C2	38.67	88.24	1.74	MultipleMeltPeaks		acrA-02	C3				NoAmplification		acrA-02	C4	38.32	61.92	1.87	MultipleMeltPeaks		acrA-02	C5				NoAmplification		acrA-02	C6	32.06	84.78	1.88			acrA-02	C8				CurveFitFailed		acrA-02
acrA-03	C1	37.51	85.95	1.74	MultipleMeltPeaks		acrA-03	C2				NoAmplification		acrA-03	C3				NoAmplification		acrA-03	C4	35.72	88.92	1.82	MultipleMeltPeaks		acrA-03	C5				NoAmplification		acrA-03	C6	36.84	88.37	1.86			acrA-03	C8	36.38	90.26	1.79	MultipleMeltPeaks		acrA-03
acrA-04	C1	29.99	80.65	1.99	MultipleMeltPeaks		acrA-04	C2	32.2	80.51	1.95			acrA-04	C3	30.07	82.47	1.97			acrA-04	C4	29.19	87.1	1.98			acrA-04	C5	29.3	80.9	2			acrA-04	C6	28.51	80.94	1.97			acrA-04	C8	28.63	89.51	2.01			acrA-04
acrA-05	C1	32.87	79.84	1.94	MultipleMeltPeaks		acrA-05	C2				CurveFitFailed		acrA-05	C3	32.8	81.91	1.89			acrA-05	C4	29.19	84.82	1.94	MultipleMeltPeaks		acrA-05	C5	29.64	86.69	1.97			acrA-05	C6	29.65	91.14	1.95			acrA-05	C8	31.15	85.29	1.95			acrA-05
acrB-01	C1				NoAmplification		acrB-01	C2	37.62	75.29	1.96			acrB-01	C3				NoAmplification		acrB-01	C4	33.28	77.19	2.03			acrB-01	C5				NoAmplification		acrB-01	C6				NoAmplification		acrB-01	C8				NoAmplification		acrB-01
acrF	C1	28.45	84.6	1.85			acrF	C2	36.86	82.66	2.6	MultipleMeltPeaks		acrF	C3	28.23	83.04	1.86			acrF	C4	26.58	82.88	1.87	MultipleMeltPeaks		acrF	C5	32.19	82.67	1.82	MultipleMeltPeaks		acrF	C6	27.07	83.12	1.79	MultipleMeltPeaks		acrF	C8	31.34	82.12	1.92			acrF
acrR-01	C1	33.43	89.59	1.9	MultipleMeltPeaks		acrR-01	C2				NoAmplification		acrR-01	C3	32.47	81.22	1.94			acrR-01	C4	34.75	85.47	1.81			acrR-01	C5	35.34	81.25	1.91			acrR-01	C6	35.17	81.07	1.87	MultipleMeltPeaks		acrR-01	C8	37.15	81.27	1.91			acrR-01
acrR-02	C1	37.9	85.39	1.84			acrR-02	C2				NoAmplification		acrR-02	C3				CurveFitFailed		acrR-02	C4	38.84	86.71	1.74	MultipleMeltPeaks		acrR-02	C5				NoAmplification		acrR-02	C6	38.41	79.14	1.76	MultipleMeltPeaks		acrR-02	C8				CurveFitFailed		acrR-02
Actin	C1	22.76	87.1	1.94			Actin	C2	28.5	87	1.89			Actin	C3	23.1	87.15	1.94			Actin	C4	21.99	86.91	1.96			Actin	C5	23.33	86.84	1.96			Actin	C6	21.01	86.81	1.97			Actin	C8	21.39	86.91	1.96			Actin
adeA	C1	35.83	83.61	1.83			adeA	C2				NoAmplification		adeA	C3				NoAmplification		adeA	C4	31.69	76.66	1.94	MultipleMeltPeaks		adeA	C5				NoAmplification		adeA	C6	34.92	88.07	1.9			adeA	C8	36.64	88.06	1.91			adeA
ampC-01	C1	31.58	80.28	1.97	MultipleMeltPeaks		ampC-01	C2	32.05	87.59	1.93	MultipleMeltPeaks		ampC-01	C3	34.42	84.79	1.91			ampC-01	C4	33.22	78.64	1.99	MultipleMeltPeaks		ampC-01	C5	34.46	85.66	1.92			ampC-01	C6	30.1	85.64	2			ampC-01	C8	32.42	87.52	2.01	MultipleMeltPeaks		ampC-01
ampC-02	C1	37.67	79.52	1.88	MultipleMeltPeaks		ampC-02	C2				CurveFitFailed		ampC-02	C3				NoAmplification		ampC-02	C4	37.16	62.1	2.12	MultipleMeltPeaks		ampC-02	C5	37.02	61.59	1.99	MultipleMeltPeaks		ampC-02	C6				NoAmplification		ampC-02	C8	33.76	89.61	1.93			ampC-02
ampC-04	C1	32.88	78.39	1.93	MultipleMeltPeaks		ampC-04	C2	35.45	85.93	1.98			ampC-04	C3	35.49	77.69	2.04			ampC-04	C4	30.62	85.11	1.86			ampC-04	C5	33.05	92.99	1.62			ampC-04	C6	30.5	78.99	1.89			ampC-04	C8	32.36	78.6	1.84			ampC-04
ampC-05	C1	38.74	91.14	1.62	MultipleMeltPeaks		ampC-05	C2				NoAmplification		ampC-05	C3				NoAmplification		ampC-05	C4	39.94	61.3	1.48	MultipleMeltPeaks		ampC-05	C5				NoAmplification		ampC-05	C6				NoAmplification		ampC-05	C8				LowEfficiency, CtIsSmall, SaturationBaselineRatioIsLow, CurveFitFailed, HighBaseline		ampC-05
ampC-06	C1	38.43	71.29	1.78	MultipleMeltPeaks		ampC-06	C2				NoAmplification		ampC-06	C3				CurveFitFailed		ampC-06	C4				NoAmplification		ampC-06	C5				NoAmplification		ampC-06	C6	33.56	84.06	1.95			ampC-06	C8				LowEfficiency, CtIsSmall, SaturationBaselineRatioIsLow, CurveFitFailed, HighBaseline		ampC-06
ampC-07	C1	37.01	82.66	1.8			ampC-07	C2				NoAmplification		ampC-07	C3	36.78	82.64	1.8	MultipleMeltPeaks		ampC-07	C4	31.48	88.68	1.85			ampC-07	C5	32.97	79.57	1.95	MultipleMeltPeaks		ampC-07	C6	33.1	82.65	1.89	MultipleMeltPeaks		ampC-07	C8	36.94	82.75	1.83	MultipleMeltPeaks		ampC-07
ampC-09	C1	39.46	91.57	1.61	MultipleMeltPeaks		ampC-09	C2				NoAmplification		ampC-09	C3				NoAmplification		ampC-09	C4				CurveFitFailed		ampC-09	C5				NoAmplification		ampC-09	C6	33.02	76.51	1.95			ampC-09	C8				CurveFitFailed		ampC-09
ampC/blaDHA	C1	31.21	85.25	1.97			ampC/blaDHA	C2				NoAmplification		ampC/blaDHA	C3	31.91	77.56	1.92			ampC/blaDHA	C4	32.91	85.08	1.92			ampC/blaDHA	C5	34.17	84.53	1.91			ampC/blaDHA	C6	32.63	79.7	1.87			ampC/blaDHA	C8	31.27	81.64	2	MultipleMeltPeaks		ampC/blaDHA
aph	C1				NoAmplification		aph	C2				NoAmplification		aph	C3				NoAmplification		aph	C4				NoAmplification		aph	C5				NoAmplification		aph	C6				NoAmplification		aph	C8				LowEfficiency, CtIsSmall, SaturationBaselineRatioIsLow, CurveFitFailed, HighBaseline		aph
aph(2')-Id-01	C1				NoAmplification		aph(2')-Id-01	C2				NoAmplification		aph(2')-Id-01	C3				NoAmplification		aph(2')-Id-01	C4				NoAmplification		aph(2')-Id-01	C5				NoAmplification		aph(2')-Id-01	C6				NoAmplification		aph(2')-Id-01	C8				LowEfficiency, CtIsSmall, SaturationBaselineRatioIsLow, CurveFitFailed, HighBaseline		aph(2')-Id-01
aph(2')-Id-02	C1				NoAmplification		aph(2')-Id-02	C2				NoAmplification		aph(2')-Id-02	C3				NoAmplification		aph(2')-Id-02	C4				NoAmplification		aph(2')-Id-02	C5				NoAmplification		aph(2')-Id-02	C6				NoAmplification		aph(2')-Id-02	C8				LowEfficiency, CtIsSmall, SaturationBaselineRatioIsLow, CurveFitFailed, HighBaseline		aph(2')-Id-02
aph6ia	C1	31.25	78.19	1.94			aph6ia	C2				NoAmplification		aph6ia	C3	38.03	79.57	1.84			aph6ia	C4				NoAmplification		aph6ia	C5				NoAmplification		aph6ia	C6	35.48	75.65	1.9	MultipleMeltPeaks		aph6ia	C8	29.95	78.79	1.94			aph6ia
aphA1(aka kanR)	C1				NoAmplification		aphA1(aka kanR)	C2				NoAmplification		aphA1(aka kanR)	C3				NoAmplification		aphA1(aka kanR)	C4				NoAmplification		aphA1(aka kanR)	C5				NoAmplification		aphA1(aka kanR)	C6				NoAmplification		aphA1(aka kanR)	C8				LowEfficiency, CtIsSmall, CurveFitFailed, HighBaseline		aphA1(aka kanR)
bacA-01	C1	38.55	83.58	1.69	MultipleMeltPeaks		bacA-01	C2				NoAmplification		bacA-01	C3				NoAmplification		bacA-01	C4				NoAmplification		bacA-01	C5				NoAmplification		bacA-01	C6	37.13	76.94	1.88			bacA-01	C8	35.1	77.95	2			bacA-01
bacA-02	C1	39.21	83.81	1.64			bacA-02	C2	32.43	83.28	1.82			bacA-02	C3	38.21	83.56	1.73	MultipleMeltPeaks		bacA-02	C4	35.11	83.56	1.73	MultipleMeltPeaks		bacA-02	C5	33.44	83.28	1.83	MultipleMeltPeaks		bacA-02	C6	33.75	87.69	1.8			bacA-02	C8	34.51	87.89	1.77	MultipleMeltPeaks		bacA-02
BETA-globin	C1	24.21	84.01	2			BETA-globin	C2	29.76	83.86	1.96			BETA-globin	C3	24.93	84.07	2.02			BETA-globin	C4	23.14	84.04	2			BETA-globin	C5	24.77	84.07	1.96			BETA-globin	C6	21.87	84.22	1.97			BETA-globin	C8	22.42	84.07	1.98			BETA-globin
bla-ACC-1	C1	36.4	78.26	1.81	MultipleMeltPeaks		bla-ACC-1	C2				NoAmplification		bla-ACC-1	C3	36.37	81.03	1.79	MultipleMeltPeaks		bla-ACC-1	C4	32.52	86.08	1.94			bla-ACC-1	C5	38.05	85.99	1.74	MultipleMeltPeaks		bla-ACC-1	C6	34.38	79.82	1.89	MultipleMeltPeaks		bla-ACC-1	C8	34.92	73.67	1.94			bla-ACC-1
bla-L1	C1	34.88	79.99	1.93	MultipleMeltPeaks		bla-L1	C2				NoAmplification		bla-L1	C3	32.96	81.84	1.96	MultipleMeltPeaks		bla-L1	C4	30.05	83.93	1.98			bla-L1	C5	31.74	82.25	1.96			bla-L1	C6	31.12	83.56	1.93			bla-L1	C8	29.6	83.54	2.01			bla-L1
bla1	C1				NoAmplification		bla1	C2				NoAmplification		bla1	C3				NoAmplification		bla1	C4				NoAmplification		bla1	C5				NoAmplification		bla1	C6				NoAmplification		bla1	C8				LowEfficiency, CtIsSmall, SaturationBaselineRatioIsLow, CurveFitFailed, HighBaseline		bla1
blaCMY	C1	36.38	80.34	1.9			blaCMY	C2				NoAmplification		blaCMY	C3				NoAmplification		blaCMY	C4	38.1	80.86	1.78	MultipleMeltPeaks		blaCMY	C5				NoAmplification		blaCMY	C6				CurveFitFailed		blaCMY	C8				CurveFitFailed		blaCMY
blaCMY2-01	C1	36.01	83.56	1.91			blaCMY2-01	C2				NoAmplification		blaCMY2-01	C3				NoAmplification		blaCMY2-01	C4				NoAmplification		blaCMY2-01	C5				NoAmplification		blaCMY2-01	C6	38.54	83.64	1.82			blaCMY2-01	C8				CurveFitFailed		blaCMY2-01
blaCMY2-02	C1	28.96	83.1	1.96	MultipleMeltPeaks		blaCMY2-02	C2	36.38	82.46	1.73	MultipleMeltPeaks		blaCMY2-02	C3	29.71	85.66	2	MultipleMeltPeaks		blaCMY2-02	C4	28.6	85.11	2.01	MultipleMeltPeaks		blaCMY2-02	C5	29.72	84.63	1.99	MultipleMeltPeaks		blaCMY2-02	C6	28.12	85.12	1.98	MultipleMeltPeaks		blaCMY2-02	C8	28.72	85.93	2.05			blaCMY2-02
blaCTX-M-01	C1	27.92	87.6	1.98			blaCTX-M-01	C2	31.93	86.74	1.95			blaCTX-M-01	C3				NoAmplification		blaCTX-M-01	C4	35.01	86.59	1.95			blaCTX-M-01	C5				NoAmplification		blaCTX-M-01	C6				NoAmplification		blaCTX-M-01	C8	35.54	86.5	1.91			blaCTX-M-01
blaCTX-M-02	C1	32.27	79.89	1.91	MultipleMeltPeaks		blaCTX-M-02	C2				NoAmplification		blaCTX-M-02	C3	36.13	80.14	1.77			blaCTX-M-02	C4	35.74	80.06	1.8	MultipleMeltPeaks		blaCTX-M-02	C5	35.48	83.6	1.79	MultipleMeltPeaks		blaCTX-M-02	C6	32.58	80.19	1.9			blaCTX-M-02	C8	33.41	88.9	1.91	MultipleMeltPeaks		blaCTX-M-02
blaCTX-M-03	C1				NoAmplification		blaCTX-M-03	C2				NoAmplification		blaCTX-M-03	C3				NoAmplification		blaCTX-M-03	C4	37.99	62.89	1.83	MultipleMeltPeaks		blaCTX-M-03	C5				NoAmplification		blaCTX-M-03	C6				NoAmplification		blaCTX-M-03	C8				CurveFitFailed		blaCTX-M-03
blaCTX-M-04	C1	30.75	88.03	1.93			blaCTX-M-04	C2	30.48	87.73	1.92			blaCTX-M-04	C3	38.91	62.41	1.74	MultipleMeltPeaks		blaCTX-M-04	C4	34.22	86.3	1.9	MultipleMeltPeaks		blaCTX-M-04	C5	38.38	87.57	1.66	MultipleMeltPeaks		blaCTX-M-04	C6	36.5	87.81	1.85			blaCTX-M-04	C8	32.31	87.13	2.03	MultipleMeltPeaks		blaCTX-M-04
blaCTX-M-05	C1	29.73	77.19	1.74			blaCTX-M-05	C2	31.35	76.38	1.78			blaCTX-M-05	C3	30.72	76.91	1.78			blaCTX-M-05	C4	32.24	76.53	1.8			blaCTX-M-05	C5	33.25	76.62	1.85			blaCTX-M-05	C6	33.22	76.65	1.8			blaCTX-M-05	C8	32.17	76.4	1.84			blaCTX-M-05
blaCTX-M-06	C1				NoAmplification		blaCTX-M-06	C2				NoAmplification		blaCTX-M-06	C3				NoAmplification		blaCTX-M-06	C4				NoAmplification		blaCTX-M-06	C5				NoAmplification		blaCTX-M-06	C6				NoAmplification		blaCTX-M-06	C8				NoAmplification		blaCTX-M-06
blaGES	C1				NoAmplification		blaGES	C2				NoAmplification		blaGES	C3				NoAmplification		blaGES	C4				NoAmplification		blaGES	C5				NoAmplification		blaGES	C6				NoAmplification		blaGES	C8				CurveFitFailed		blaGES
blaIMP-01	C1				NoAmplification		blaIMP-01	C2				NoAmplification		blaIMP-01	C3				NoAmplification		blaIMP-01	C4				NoAmplification		blaIMP-01	C5				NoAmplification		blaIMP-01	C6				NoAmplification		blaIMP-01	C8				LowEfficiency, CtIsSmall, CurveFitFailed, HighBaseline		blaIMP-01
blaIMP-02	C1	37.31	74.9	2.22			blaIMP-02	C2				NoAmplification		blaIMP-02	C3				NoAmplification		blaIMP-02	C4	34.78	85.22	1.92			blaIMP-02	C5				NoAmplification		blaIMP-02	C6				NoAmplification		blaIMP-02	C8				LowEfficiency, CtIsSmall, SaturationBaselineRatioIsLow, CurveFitFailed, HighBaseline		blaIMP-02
blaMOX/blaCMY	C1				NoAmplification		blaMOX/blaCMY	C2				NoAmplification		blaMOX/blaCMY	C3	35.21	88.22	1.88	MultipleMeltPeaks		blaMOX/blaCMY	C4				NoAmplification		blaMOX/blaCMY	C5				NoAmplification		blaMOX/blaCMY	C6	36.01	82.24	1.92			blaMOX/blaCMY	C8	37.06	82.31	2.17			blaMOX/blaCMY
blaOCH	C1				NoAmplification		blaOCH	C2				NoAmplification		blaOCH	C3				NoAmplification		blaOCH	C4				NoAmplification		blaOCH	C5				NoAmplification		blaOCH	C6				NoAmplification		blaOCH	C8				NoAmplification		blaOCH
blaOKP	C1				NoAmplification		blaOKP	C2				NoAmplification		blaOKP	C3				NoAmplification		blaOKP	C4				NoAmplification		blaOKP	C5				NoAmplification		blaOKP	C6				NoAmplification		blaOKP	C8				NoAmplification		blaOKP
blaOXA1/blaOXA30	C1				NoAmplification		blaOXA1/blaOXA30	C2				NoAmplification		blaOXA1/blaOXA30	C3				NoAmplification		blaOXA1/blaOXA30	C4				NoAmplification		blaOXA1/blaOXA30	C5				NoAmplification		blaOXA1/blaOXA30	C6				NoAmplification		blaOXA1/blaOXA30	C8				LowEfficiency, CtIsSmall, SaturationBaselineRatioIsLow, CurveFitFailed, HighBaseline		blaOXA1/blaOXA30
blaOXA10-01	C1				NoAmplification		blaOXA10-01	C2				NoAmplification		blaOXA10-01	C3				NoAmplification		blaOXA10-01	C4				NoAmplification		blaOXA10-01	C5				NoAmplification		blaOXA10-01	C6				NoAmplification		blaOXA10-01	C8				CurveFitFailed		blaOXA10-01
blaOXA10-02	C1				NoAmplification		blaOXA10-02	C2				NoAmplification		blaOXA10-02	C3				NoAmplification		blaOXA10-02	C4				NoAmplification		blaOXA10-02	C5				NoAmplification		blaOXA10-02	C6				NoAmplification		blaOXA10-02	C8				LowEfficiency, CtIsSmall, SaturationBaselineRatioIsLow, CurveFitFailed, HighBaseline		blaOXA10-02
blaOXY	C1	34.3	82.41	1.79	MultipleMeltPeaks		blaOXY	C2	37.75	88.35	1.73			blaOXY	C3	38.81	67.45	1.56	MultipleMeltPeaks		blaOXY	C4	37.71	67.94	1.71	MultipleMeltPeaks		blaOXY	C5	36.75	88.8	1.73			blaOXY	C6	38.98	64.76	1.6	MultipleMeltPeaks		blaOXY	C8	36.77	88.71	1.79			blaOXY
blaPAO	C1				NoAmplification		blaPAO	C2				NoAmplification		blaPAO	C3				NoAmplification		blaPAO	C4				NoAmplification		blaPAO	C5				NoAmplification		blaPAO	C6				NoAmplification		blaPAO	C8				CurveFitFailed		blaPAO
blaPER	C1	35.69	77.8	1.88			blaPER	C2	38.53	69.66	1.66			blaPER	C3				NoAmplification		blaPER	C4				NoAmplification		blaPER	C5				CurveFitFailed		blaPER	C6				NoAmplification		blaPER	C8				LowEfficiency, CtIsSmall, SaturationBaselineRatioIsLow, CurveFitFailed, HighBaseline		blaPER
blaPSE	C1				NoAmplification		blaPSE	C2				NoAmplification		blaPSE	C3				NoAmplification		blaPSE	C4				NoAmplification		blaPSE	C5				NoAmplification		blaPSE	C6				NoAmplification		blaPSE	C8				NoAmplification		blaPSE
blaROB	C1				NoAmplification		blaROB	C2				NoAmplification		blaROB	C3				NoAmplification		blaROB	C4	37.31	64.02	1.66	MultipleMeltPeaks		blaROB	C5				NoAmplification		blaROB	C6				NoAmplification		blaROB	C8				CurveFitFailed		blaROB
blaSFO	C1	31.8	82.31	1.94	MultipleMeltPeaks		blaSFO	C2	38.89	76.99	1.72			blaSFO	C3	31.08	82.36	1.93	MultipleMeltPeaks		blaSFO	C4	30.34	80.11	1.96	MultipleMeltPeaks		blaSFO	C5	32.85	82.74	1.88			blaSFO	C6	29.25	80.62	1.97	MultipleMeltPeaks		blaSFO	C8	31.47	83.55	1.95	MultipleMeltPeaks		blaSFO
blaSHV-01	C1	35.03	72.52	1.85	MultipleMeltPeaks		blaSHV-01	C2	35.67	88.82	1.74			blaSHV-01	C3	38.31	64.81	1.61	MultipleMeltPeaks		blaSHV-01	C4				CurveFitFailed		blaSHV-01	C5	36.87	85.49	1.77			blaSHV-01	C6	35.41	73.23	1.76	MultipleMeltPeaks		blaSHV-01	C8	34.22	89	1.81			blaSHV-01
blaSHV-02	C1	38.35	86.01	1.73	MultipleMeltPeaks		blaSHV-02	C2				NoAmplification		blaSHV-02	C3				NoAmplification		blaSHV-02	C4				CurveFitFailed		blaSHV-02	C5	32.43	83.84	2.06			blaSHV-02	C6	41.05	62.11	1.53	BadR2, MultipleMeltPeaks		blaSHV-02	C8				LowEfficiency, CtIsSmall, SaturationBaselineRatioIsLow, CurveFitFailed, HighBaseline		blaSHV-02
blaTEM	C1	37.47	83.98	1.78			blaTEM	C2	27.97	79.08	2.04			blaTEM	C3				NoAmplification		blaTEM	C4	34.18	77.83	2.05			blaTEM	C5	28.47	79.18	2.04			blaTEM	C6	36.63	83.7	1.85	MultipleMeltPeaks		blaTEM	C8	34.58	84.03	2.1			blaTEM
blaTLA	C1				NoAmplification		blaTLA	C2				NoAmplification		blaTLA	C3				NoAmplification		blaTLA	C4				NoAmplification		blaTLA	C5				NoAmplification		blaTLA	C6				NoAmplification		blaTLA	C8				LowEfficiency, CtIsSmall, SaturationBaselineRatioIsLow, CurveFitFailed, HighBaseline		blaTLA
blaVEB	C1				NoAmplification		blaVEB	C2				NoAmplification		blaVEB	C3				NoAmplification		blaVEB	C4				NoAmplification		blaVEB	C5				NoAmplification		blaVEB	C6				NoAmplification		blaVEB	C8				LowEfficiency, CtIsSmall, SaturationBaselineRatioIsLow, CurveFitFailed, HighBaseline		blaVEB
blaVIM	C1				NoAmplification		blaVIM	C2				NoAmplification		blaVIM	C3				NoAmplification		blaVIM	C4				NoAmplification		blaVIM	C5				NoAmplification		blaVIM	C6				NoAmplification		blaVIM	C8				NoAmplification		blaVIM
blaZ	C1				NoAmplification		blaZ	C2				NoAmplification		blaZ	C3				NoAmplification		blaZ	C4				NoAmplification		blaZ	C5				NoAmplification		blaZ	C6				NoAmplification		blaZ	C8				LowEfficiency, CtIsSmall, SaturationBaselineRatioIsLow, CurveFitFailed, HighBaseline		blaZ
carB	C1	38.9	79.9	1.77	MultipleMeltPeaks		carB	C2				NoAmplification		carB	C3				NoAmplification		carB	C4	39.87	82.66	1.79			carB	C5				NoAmplification		carB	C6				NoAmplification		carB	C8	35.33	89.9	1.91			carB
catA1	C1				NoAmplification		catA1	C2				NoAmplification		catA1	C3				NoAmplification		catA1	C4				NoAmplification		catA1	C5				NoAmplification		catA1	C6				NoAmplification		catA1	C8				NoAmplification		catA1
catB3	C1	32.95	80.2	1.98			catB3	C2				NoAmplification		catB3	C3				NoAmplification		catB3	C4	37.7	80.03	1.79	MultipleMeltPeaks		catB3	C5				NoAmplification		catB3	C6	40.24	79.99	1.72	MultipleMeltPeaks		catB3	C8	31.5	87.52	2			catB3
catB8	C1	29.15	81.59	1.95			catB8	C2	33.42	79.53	1.89	MultipleMeltPeaks		catB8	C3	29.17	82.03	1.95			catB8	C4	28.44	83.01	1.99			catB8	C5	30.41	82.79	1.98			catB8	C6	29.55	81.57	2.01			catB8	C8	28.93	82.41	2			catB8
ceoA	C1	30.56	81.96	1.93	MultipleMeltPeaks		ceoA	C2				NoAmplification		ceoA	C3	28.96	82.36	1.95			ceoA	C4	28.41	82.34	1.97			ceoA	C5	30.73	82.35	1.94			ceoA	C6	27.33	82.49	1.98			ceoA	C8	30.61	82.08	1.96	MultipleMeltPeaks		ceoA
cepA	C1				NoAmplification		cepA	C2				NoAmplification		cepA	C3				NoAmplification		cepA	C4				NoAmplification		cepA	C5				NoAmplification		cepA	C6				NoAmplification		cepA	C8				LowEfficiency, CtIsSmall, SaturationBaselineRatioIsLow, CurveFitFailed, HighBaseline		cepA
cfiA	C1	33.14	79.59	1.94	MultipleMeltPeaks		cfiA	C2				NoAmplification		cfiA	C3	32.19	84.64	1.91			cfiA	C4	31.8	86.39	1.91	MultipleMeltPeaks		cfiA	C5	32.52	80.49	1.84			cfiA	C6	32.93	88.64	1.94			cfiA	C8	32.42	88.69	1.97	MultipleMeltPeaks		cfiA
cfr	C1				NoAmplification		cfr	C2				NoAmplification		cfr	C3				NoAmplification		cfr	C4				NoAmplification		cfr	C5				NoAmplification		cfr	C6				NoAmplification		cfr	C8				LowEfficiency, CtIsSmall, CurveFitFailed, HighBaseline		cfr
cfxA	C1	22.53	77.63	2.09			cfxA	C2	25.4	77.26	2.02			cfxA	C3	38.46	73.6	1.96			cfxA	C4	23.5	77.66	2.08			cfxA	C5	25.86	77.58	2.05			cfxA	C6	24.64	77.57	2.04			cfxA	C8	24.92	77.57	2.04			cfxA
cmeA	C1				LowEfficiency, CtIsSmall, SaturationBaselineRatioIsLow, CurveFitFailed, HighBaseline		cmeA	C2				NoAmplification		cmeA	C3	38.44	85.01	1.8	MultipleMeltPeaks		cmeA	C4	36.77	81.85	1.82	MultipleMeltPeaks		cmeA	C5	38.1	79.39	1.8			cmeA	C6	34.69	84.91	1.85			cmeA	C8				CurveFitFailed		cmeA
cmlA1-01	C1	37.82	88.66	1.8	MultipleMeltPeaks		cmlA1-01	C2				NoAmplification		cmlA1-01	C3				NoAmplification		cmlA1-01	C4	37.87	80.75	1.81			cmlA1-01	C5	37.99	61.47	1.89	BadR2, MultipleMeltPeaks		cmlA1-01	C6	31.53	86.6	1.93			cmlA1-01	C8	37.25	87.57	1.8			cmlA1-01
cmlA1-02	C1	37.59	62.16	1.93	MultipleMeltPeaks		cmlA1-02	C2				NoAmplification		cmlA1-02	C3	36.44	88.35	1.88			cmlA1-02	C4				NoAmplification		cmlA1-02	C5				NoAmplification		cmlA1-02	C6				NoAmplification		cmlA1-02	C8	37.02	88.25	1.81			cmlA1-02
cmr	C1				CurveFitFailed		cmr	C2				NoAmplification		cmr	C3				NoAmplification		cmr	C4				NoAmplification		cmr	C5				NoAmplification		cmr	C6	37.97	78.64	1.73	MultipleMeltPeaks		cmr	C8				CurveFitFailed		cmr
cmx(A)	C1	28.58	84.47	1.96	MultipleMeltPeaks		cmx(A)	C2	35.79	75.14	1.87	MultipleMeltPeaks		cmx(A)	C3	27.91	84.56	1.94			cmx(A)	C4	28.78	86.33	1.99			cmx(A)	C5	29.38	84.61	1.99			cmx(A)	C6	25.54	84.46	1.99			cmx(A)	C8	26.07	86.4	1.97			cmx(A)
cphA-01	C1	29.64	86.58	1.92			cphA-01	C2				NoAmplification		cphA-01	C3	30.72	88.81	1.92			cphA-01	C4	30.61	91.42	1.99			cphA-01	C5	34.34	85.58	1.94			cphA-01	C6	30.32	85.66	1.95			cphA-01	C8	32.75	85.51	1.99			cphA-01
cphA-02	C1	34.52	83.4	1.92			cphA-02	C2	35.93	82.35	1.8			cphA-02	C3	30	78.32	1.98	MultipleMeltPeaks		cphA-02	C4	32.69	82.36	1.97	MultipleMeltPeaks		cphA-02	C5				CurveFitFailed		cphA-02	C6	33.09	82.52	1.99			cphA-02	C8	33.89	82.63	2.02			cphA-02
dfrA1	C1	35.37	85.67	1.83			dfrA1	C2				NoAmplification		dfrA1	C3	37.94	78.64	1.89			dfrA1	C4	37.5	81.95	1.88			dfrA1	C5				NoAmplification		dfrA1	C6	33.2	78.55	2.01			dfrA1	C8				NoAmplification		dfrA1
dfrA12	C1	36.74	61.42	1.74	MultipleMeltPeaks		dfrA12	C2				NoAmplification		dfrA12	C3				NoAmplification		dfrA12	C4	37.44	77.19	1.85	MultipleMeltPeaks		dfrA12	C5	39.12	82.79	1.73	MultipleMeltPeaks		dfrA12	C6	35.71	82.66	1.89			dfrA12	C8	37.42	88.25	1.86			dfrA12
emrD	C1	29	90.64	1.87			emrD	C2	35.74	90.38	1.77			emrD	C3				NoAmplification		emrD	C4	38.01	89.08	1.7	MultipleMeltPeaks		emrD	C5	36.48	83.6	1.86			emrD	C6	35.07	88.32	1.83			emrD	C8	35.79	88.97	1.81			emrD
ereA	C1	30.87	83.44	1.96			ereA	C2				NoAmplification		ereA	C3	38.78	82.81	1.82	MultipleMeltPeaks		ereA	C4	39.16	83.34	1.75			ereA	C5	31.87	82.63	1.95			ereA	C6	38.73	82.75	1.8	MultipleMeltPeaks		ereA	C8	37.01	81.97	1.89			ereA
ereB	C1	38.98	78.99	1.69			ereB	C2				NoAmplification		ereB	C3				CurveFitFailed		ereB	C4	30.48	85.66	2.03			ereB	C5				NoAmplification		ereB	C6	34.89	85.59	1.92	MultipleMeltPeaks		ereB	C8	33.44	87.82	1.97			ereB
erm(34)	C1				NoAmplification		erm(34)	C2				NoAmplification		erm(34)	C3				NoAmplification		erm(34)	C4				NoAmplification		erm(34)	C5				NoAmplification		erm(34)	C6				NoAmplification		erm(34)	C8	37.01	83.48	2.17	MultipleMeltPeaks		erm(34)
erm(35)	C1				NoAmplification		erm(35)	C2				NoAmplification		erm(35)	C3				NoAmplification		erm(35)	C4				NoAmplification		erm(35)	C5				NoAmplification		erm(35)	C6				NoAmplification		erm(35)	C8				LowEfficiency, CtIsSmall, CurveFitFailed, HighBaseline		erm(35)
erm(36)	C1	29.73	80.9	1.98	MultipleMeltPeaks		erm(36)	C2	33.75	81.43	1.92			erm(36)	C3	35.6	85.93	1.81			erm(36)	C4	31.09	82.76	2.12			erm(36)	C5				NoAmplification		erm(36)	C6	31.3	84.25	2.08			erm(36)	C8	36.83	85.96	2.06	MultipleMeltPeaks		erm(36)
ermA	C1				NoAmplification		ermA	C2				NoAmplification		ermA	C3				NoAmplification		ermA	C4				LowEfficiency, CtIsSmall, CurveFitFailed, HighBaseline		ermA	C5				NoAmplification		ermA	C6				NoAmplification		ermA	C8				LowEfficiency, CtIsSmall, SaturationBaselineRatioIsLow, CurveFitFailed, HighBaseline		ermA
ermA/ermTR	C1				NoAmplification		ermA/ermTR	C2				NoAmplification		ermA/ermTR	C3				NoAmplification		ermA/ermTR	C4				NoAmplification		ermA/ermTR	C5				NoAmplification		ermA/ermTR	C6				NoAmplification		ermA/ermTR	C8				NoAmplification		ermA/ermTR
ermB	C1				NoAmplification		ermB	C2	27.23	74.89	2.01			ermB	C3				NoAmplification		ermB	C4				NoAmplification		ermB	C5	26.43	75.2	2.09			ermB	C6				NoAmplification		ermB	C8	28.22	75.08	2.1			ermB
ermC	C1	37.5	88.61	1.84	MultipleMeltPeaks		ermC	C2				NoAmplification		ermC	C3				NoAmplification		ermC	C4				LowEfficiency, CtIsSmall, CurveFitFailed, HighBaseline		ermC	C5	34.62	85.47	1.95			ermC	C6				NoAmplification		ermC	C8				LowEfficiency, CtIsSmall, SaturationBaselineRatioIsLow, CurveFitFailed, HighBaseline		ermC
ermF	C1				NoAmplification		ermF	C2				NoAmplification		ermF	C3				NoAmplification		ermF	C4				NoAmplification		ermF	C5				NoAmplification		ermF	C6				NoAmplification		ermF	C8	27.31	74.57	2.01			ermF
ermJ/ermD	C1				NoAmplification		ermJ/ermD	C2				NoAmplification		ermJ/ermD	C3				NoAmplification		ermJ/ermD	C4				NoAmplification		ermJ/ermD	C5				NoAmplification		ermJ/ermD	C6				NoAmplification		ermJ/ermD	C8				CurveFitFailed		ermJ/ermD
ermK-01	C1	37.58	80.08	1.9	MultipleMeltPeaks		ermK-01	C2				NoAmplification		ermK-01	C3	40.39	79.06	1.78			ermK-01	C4	37.08	61.87	2.27	MultipleMeltPeaks		ermK-01	C5				NoAmplification		ermK-01	C6	34.67	89.04	1.88			ermK-01	C8				LowEfficiency, CtIsSmall, SaturationBaselineRatioIsLow, CurveFitFailed, HighBaseline		ermK-01
ermK-02	C1	35.53	85.53	1.73			ermK-02	C2				NoAmplification		ermK-02	C3				CurveFitFailed		ermK-02	C4	38.78	88.83	1.7	MultipleMeltPeaks		ermK-02	C5	38.25	84.26	1.79	MultipleMeltPeaks		ermK-02	C6	32.57	86.19	1.89			ermK-02	C8	36.15	82.32	1.82			ermK-02
ermT-01	C1				NoAmplification		ermT-01	C2				NoAmplification		ermT-01	C3				NoAmplification		ermT-01	C4				NoAmplification		ermT-01	C5				NoAmplification		ermT-01	C6				NoAmplification		ermT-01	C8				LowEfficiency, CtIsSmall, SaturationBaselineRatioIsLow, CurveFitFailed, HighBaseline		ermT-01
ermT-02	C1	37.5	79.92	1.8			ermT-02	C2				NoAmplification		ermT-02	C3	35.04	74.72	1.99			ermT-02	C4				CurveFitFailed		ermT-02	C5				NoAmplification		ermT-02	C6				NoAmplification		ermT-02	C8	37.99	74.36	1.93			ermT-02
ermX	C1	33.37	87.7	1.84			ermX	C2				NoAmplification		ermX	C3	37.25	87.02	1.71			ermX	C4	36.35	83.92	1.72	MultipleMeltPeaks		ermX	C5	36.19	61.31	2.28	MultipleMeltPeaks		ermX	C6	26.66	84.06	1.88			ermX	C8	37.53	85.42	1.7			ermX
ermY	C1				NoAmplification		ermY	C2				NoAmplification		ermY	C3				NoAmplification		ermY	C4				NoAmplification		ermY	C5				NoAmplification		ermY	C6				NoAmplification		ermY	C8				LowEfficiency, CtIsSmall, SaturationBaselineRatioIsLow, CurveFitFailed, HighBaseline		ermY
fabK	C1	23.25	79.17	2.14			fabK	C2	27.68	79.81	2.07			fabK	C3	27.89	79.51	2.01			fabK	C4	25.87	79.44	2.1			fabK	C5	27.29	79.35	2.08			fabK	C6	25.71	79.36	2.11			fabK	C8	22.84	78.92	2.17			fabK
floR	C1	37.36	90.28	1.84	MultipleMeltPeaks		floR	C2				NoAmplification		floR	C3				NoAmplification		floR	C4	37.24	83.55	1.89	MultipleMeltPeaks		floR	C5				NoAmplification		floR	C6				NoAmplification		floR	C8	34.85	89.48	1.83			floR
folA	C1				NoAmplification		folA	C2				NoAmplification		folA	C3	35.79	76.7	1.91			folA	C4				NoAmplification		folA	C5	37.07	73.8	1.96			folA	C6				NoAmplification		folA	C8				NoAmplification		folA
fosB	C1				LowEfficiency, CtIsSmall, SaturationBaselineRatioIsLow, CurveFitFailed, HighBaseline		fosB	C2				LowEfficiency, CtIsSmall, SaturationBaselineRatioIsLow, CurveFitFailed, HighBaseline		fosB	C3				LowEfficiency, CtIsSmall, SaturationBaselineRatioIsLow, CurveFitFailed		fosB	C4				LowEfficiency, CtIsSmall, SaturationBaselineRatioIsLow, CurveFitFailed, HighBaseline		fosB	C5				LowEfficiency, CtIsSmall, SaturationBaselineRatioIsLow, CurveFitFailed		fosB	C6				LowEfficiency, CtIsSmall, SaturationBaselineRatioIsLow, CurveFitFailed, HighBaseline		fosB	C8				LowEfficiency, CtIsSmall, SaturationBaselineRatioIsLow, CurveFitFailed, HighBaseline		fosB
fosX	C1				NoAmplification		fosX	C2				NoAmplification		fosX	C3				NoAmplification		fosX	C4				NoAmplification		fosX	C5				NoAmplification		fosX	C6				NoAmplification		fosX	C8				LowEfficiency, CtIsSmall, SaturationBaselineRatioIsLow, CurveFitFailed, HighBaseline		fosX
fox5	C1	27.6	86.56	1.97			fox5	C2	36.62	78.43	1.79	MultipleMeltPeaks		fox5	C3	27.97	87.22	1.98	MultipleMeltPeaks		fox5	C4	26.68	86.75	1.97			fox5	C5	27.91	86.57	1.96			fox5	C6	26.94	86.6	1.98			fox5	C8	27.66	86.83	1.99			fox5
imiR	C1				NoAmplification		imiR	C2				LowEfficiency, CurveFitFailed		imiR	C3	37.42	74.52	1.82			imiR	C4				CurveFitFailed		imiR	C5				CurveFitFailed		imiR	C6				NoAmplification		imiR	C8				LowEfficiency, CtIsSmall, CurveFitFailed, HighBaseline		imiR
ImrA-01	C1				NoAmplification		ImrA-01	C2				NoAmplification		ImrA-01	C3				NoAmplification		ImrA-01	C4	39.46	79.62	1.77			ImrA-01	C5				NoAmplification		ImrA-01	C6	33.64	78.69	2.07			ImrA-01	C8				CurveFitFailed		ImrA-01
intI	C1	31.76	84.51	1.93			intI	C2				NoAmplification		intI	C3	33.53	84.68	1.94			intI	C4	30.73	84.73	1.94			intI	C5	32.17	84.8	1.95			intI	C6	31.73	84.91	1.91			intI	C8	30.12	84.74	1.96			intI
intI1	C1	21.55	87.34	2.01			intI1	C2	24.56	86.76	2.01			intI1	C3	23.01	87.21	1.98			intI1	C4	21.42	86.98	2			intI1	C5	23.04	87.21	1.96			intI1	C6	21.68	87.12	1.97	MultipleMeltPeaks		intI1	C8	21.77	87.07	2	MultipleMeltPeaks		intI1
IS613	C1	26.91	79.57	2.03			IS613	C2	27.07	79.4	2.04			IS613	C3				NoAmplification		IS613	C4	25.29	79.57	2.02			IS613	C5	26.23	79.46	1.92			IS613	C6	24.49	79.56	1.95			IS613	C8	28.09	79.83	2.01			IS613
lnuA-01	C1				NoAmplification		lnuA-01	C2				NoAmplification		lnuA-01	C3				NoAmplification		lnuA-01	C4				NoAmplification		lnuA-01	C5				NoAmplification		lnuA-01	C6				NoAmplification		lnuA-01	C8				LowEfficiency, CtIsSmall, SaturationBaselineRatioIsLow, CurveFitFailed, HighBaseline		lnuA-01
lnuB-01	C1				NoAmplification		lnuB-01	C2				NoAmplification		lnuB-01	C3				NoAmplification		lnuB-01	C4				NoAmplification		lnuB-01	C5				NoAmplification		lnuB-01	C6				NoAmplification		lnuB-01	C8				LowEfficiency, CtIsSmall, SaturationBaselineRatioIsLow, CurveFitFailed, HighBaseline		lnuB-01
lnuB-02	C1				NoAmplification		lnuB-02	C2				NoAmplification		lnuB-02	C3				NoAmplification		lnuB-02	C4				NoAmplification		lnuB-02	C5				NoAmplification		lnuB-02	C6				NoAmplification		lnuB-02	C8				CurveFitFailed		lnuB-02
lnuC	C1				CurveFitFailed		lnuC	C2				NoAmplification		lnuC	C3				NoAmplification		lnuC	C4	38.41	84.04	1.63	MultipleMeltPeaks		lnuC	C5				CurveFitFailed		lnuC	C6	36.64	81.01	1.75	MultipleMeltPeaks		lnuC	C8				CurveFitFailed		lnuC
marR-01	C1	31.46	89.01	1.93	MultipleMeltPeaks		marR-01	C2				NoAmplification		marR-01	C3				NoAmplification		marR-01	C4	35.24	85.2	1.89			marR-01	C5				NoAmplification		marR-01	C6	33.04	85.42	1.99			marR-01	C8	32.28	83.22	1.96			marR-01
matA/mel	C1	21.53	77.67	2.04			matA/mel	C2	24.1	77.48	2.02			matA/mel	C3	35.27	82.28	1.99			matA/mel	C4	22.57	77.69	2.05			matA/mel	C5	25.01	77.63	2.05			matA/mel	C6	25.88	77.23	2.04	MultipleMeltPeaks		matA/mel	C8	21.3	77.64	2.06			matA/mel
mdetl1	C1				NoAmplification		mdetl1	C2				NoAmplification		mdetl1	C3				NoAmplification		mdetl1	C4				NoAmplification		mdetl1	C5				NoAmplification		mdetl1	C6				NoAmplification		mdetl1	C8				LowEfficiency, CtIsSmall, CurveFitFailed, HighBaseline		mdetl1
mdtA	C1	37.39	81.98	1.93			mdtA	C2				NoAmplification		mdtA	C3				NoAmplification		mdtA	C4	36.7	64.28	2.24	MultipleMeltPeaks		mdtA	C5				NoAmplification		mdtA	C6	37.18	82.37	1.85			mdtA	C8				CurveFitFailed		mdtA
mdtE/yhiU	C1	33.68	85.99	1.81			mdtE/yhiU	C2	36.86	85.15	1.66			mdtE/yhiU	C3				NoAmplification		mdtE/yhiU	C4	37.39	88.08	1.91	MultipleMeltPeaks		mdtE/yhiU	C5				NoAmplification		mdtE/yhiU	C6				NoAmplification		mdtE/yhiU	C8	32.8	86.87	1.92			mdtE/yhiU
mecA	C1				LowEfficiency, CtIsSmall, CurveFitFailed, HighBaseline		mecA	C2				NoAmplification		mecA	C3				NoAmplification		mecA	C4				NoAmplification		mecA	C5				NoAmplification		mecA	C6				NoAmplification		mecA	C8				LowEfficiency, CtIsSmall, SaturationBaselineRatioIsLow, CurveFitFailed, HighBaseline		mecA
mefA	C1	20.21	80.32	1.97	MultipleMeltPeaks		mefA	C2	23.34	80.69	1.95			mefA	C3	27.54	80.64	1.94			mefA	C4	21.85	80.48	1.97			mefA	C5	24.3	80.5	1.98			mefA	C6	24.81	80.65	1.98			mefA	C8	20.82	80.48	1.98			mefA
mepA	C1	31	87.1	1.94	MultipleMeltPeaks		mepA	C2	35.15	81.17	1.88			mepA	C3	34.13	78.86	1.93			mepA	C4	31.94	87.17	2.01			mepA	C5	33.91	78.69	2.02			mepA	C6	33	77.41	1.97	MultipleMeltPeaks		mepA	C8	32.78	84.76	1.93	MultipleMeltPeaks		mepA
mexA	C1				NoAmplification		mexA	C2	40.9	61.98	1.63	MultipleMeltPeaks		mexA	C3				NoAmplification		mexA	C4	36.59	62.08	2.31	MultipleMeltPeaks		mexA	C5				NoAmplification		mexA	C6				NoAmplification		mexA	C8				BadR2, LowEfficiency, CtIsSmall, SaturationBaselineRatioIsLow, CurveFitFailed		mexA
mexD	C1	33.71	86.07	2			mexD	C2				NoAmplification		mexD	C3	32.34	79.07	2.04			mexD	C4	38.58	84.48	1.87	MultipleMeltPeaks		mexD	C5	34.53	80.08	2.02			mexD	C6	33.78	80.2	2.04			mexD	C8	31.32	82.34	1.94	MultipleMeltPeaks		mexD
mexE	C1	35.47	88.3	1.84			mexE	C2				NoAmplification		mexE	C3	34.79	87.15	1.87			mexE	C4	39.58	89.03	1.69	MultipleMeltPeaks		mexE	C5	37.63	80.92	1.89			mexE	C6				NoAmplification		mexE	C8	37.78	87.55	1.86	MultipleMeltPeaks		mexE
mexF	C1	26.37	89.67	2.03			mexF	C2	30.89	87.47	1.99			mexF	C3	30.67	87.5	2.01			mexF	C4	28.28	81.55	1.83			mexF	C5	30.2	87.48	2.06	MultipleMeltPeaks		mexF	C6	28.54	87.31	2.1	MultipleMeltPeaks		mexF	C8	28.08	87.52	1.98			mexF
mphA-01	C1	28.26	88.85	2.01			mphA-01	C2	31.42	88.8	1.94			mphA-01	C3	34.32	86.75	1.94			mphA-01	C4	30.16	86.56	1.99			mphA-01	C5	34.89	79.92	1.98	MultipleMeltPeaks		mphA-01	C6	31.12	86.72	1.98	MultipleMeltPeaks		mphA-01	C8	31.25	86.27	1.91	MultipleMeltPeaks		mphA-01
mphA-02	C1	30.52	86.68	2.09			mphA-02	C2	35.94	78.76	1.87			mphA-02	C3	31.1	86.75	1.8	MultipleMeltPeaks		mphA-02	C4	31.3	88.12	1.86	MultipleMeltPeaks		mphA-02	C5	31.69	86.73	1.55			mphA-02	C6	33.58	76.59	1.52	MultipleMeltPeaks		mphA-02	C8	31.91	76.91	1.73	MultipleMeltPeaks		mphA-02
mphB	C1	32.99	82.79	1.97			mphB	C2	35.69	88.58	1.86			mphB	C3	38.74	79.42	1.78	MultipleMeltPeaks		mphB	C4	35.18	84.67	1.91			mphB	C5				NoAmplification		mphB	C6	37.57	82.84	1.79			mphB	C8				CurveFitFailed		mphB
mphC	C1	35.29	76.12	1.89	MultipleMeltPeaks		mphC	C2				NoAmplification		mphC	C3				NoAmplification		mphC	C4	37.59	78.85	1.74	MultipleMeltPeaks		mphC	C5	38.79	61.73	1.64	MultipleMeltPeaks		mphC	C6	36.69	77.72	1.83	MultipleMeltPeaks		mphC	C8				LowEfficiency, CtIsSmall, SaturationBaselineRatioIsLow, CurveFitFailed, HighBaseline		mphC
msrA-01	C1				NoAmplification		msrA-01	C2				NoAmplification		msrA-01	C3				NoAmplification		msrA-01	C4				NoAmplification		msrA-01	C5				NoAmplification		msrA-01	C6				NoAmplification		msrA-01	C8				LowEfficiency, CtIsSmall, CurveFitFailed, HighBaseline		msrA-01
msrC-01	C1				NoAmplification		msrC-01	C2				NoAmplification		msrC-01	C3				NoAmplification		msrC-01	C4				NoAmplification		msrC-01	C5				NoAmplification		msrC-01	C6				NoAmplification		msrC-01	C8				NoAmplification		msrC-01
mtrC-01	C1	33.37	83.06	1.9			mtrC-01	C2				NoAmplification		mtrC-01	C3	39	62.46	1.74	MultipleMeltPeaks		mtrC-01	C4	36.23	82.34	1.91			mtrC-01	C5				NoAmplification		mtrC-01	C6	37.48	83.19	1.77	MultipleMeltPeaks		mtrC-01	C8				CurveFitFailed		mtrC-01
mtrC-02	C1	33.06	83.74	1.95			mtrC-02	C2	35.67	81.18	1.89	MultipleMeltPeaks		mtrC-02	C3	33.18	74.78	1.98			mtrC-02	C4	31.27	84.33	1.99			mtrC-02	C5	38.7	85.36	1.69			mtrC-02	C6	29.42	84.38	1.98			mtrC-02	C8	35.74	84.41	1.97	MultipleMeltPeaks		mtrC-02
mtrD-02	C1	29.16	81.09	1.99			mtrD-02	C2	30.32	88.7	1.93	MultipleMeltPeaks		mtrD-02	C3	29.18	82.56	1.99			mtrD-02	C4	27.24	82.49	2.01	MultipleMeltPeaks		mtrD-02	C5	28.39	85.14	2.01	MultipleMeltPeaks		mtrD-02	C6	27.5	82.35	1.94	MultipleMeltPeaks		mtrD-02	C8	26.52	85.26	1.99			mtrD-02
mtrD-03	C1	29.02	84.15	1.92	MultipleMeltPeaks		mtrD-03	C2	33.56	81.07	1.84			mtrD-03	C3	37.98	75.58	1.85	MultipleMeltPeaks		mtrD-03	C4	34.24	80.63	1.9			mtrD-03	C5	40.9	85.42	1.73	MultipleMeltPeaks		mtrD-03	C6	38.31	85.15	1.76	MultipleMeltPeaks		mtrD-03	C8	32.38	81.39	1.87			mtrD-03
NDM1	C1				LowEfficiency, CtIsSmall, SaturationBaselineRatioIsLow, CurveFitFailed		NDM1	C2				NoAmplification		NDM1	C3				NoAmplification		NDM1	C4	38.23	90.99	1.73	MultipleMeltPeaks		NDM1	C5	38.3	78.49	1.87	MultipleMeltPeaks		NDM1	C6	36.96	87.01	1.71			NDM1	C8				CurveFitFailed		NDM1
nimE	C1	36.63	75.45	2.04			nimE	C2	37.6	74.77	1.91			nimE	C3	32.37	76.35	1.98			nimE	C4	36.68	61.95	1.87	MultipleMeltPeaks		nimE	C5	35.12	85.08	1.93			nimE	C6	37.62	74.93	2.05			nimE	C8	33.57	76.02	2.02			nimE
nisB	C1				NoAmplification		nisB	C2				NoAmplification		nisB	C3				NoAmplification		nisB	C4	38.5	82.06	1.81			nisB	C5				NoAmplification		nisB	C6				NoAmplification		nisB	C8				LowEfficiency, CtIsSmall, CurveFitFailed, HighBaseline		nisB
oleC	C1	37.8	61.83	1.86	MultipleMeltPeaks		oleC	C2				NoAmplification		oleC	C3				NoAmplification		oleC	C4	37.12	87.47	1.93			oleC	C5				NoAmplification		oleC	C6	37.64	86.05	1.97	MultipleMeltPeaks		oleC	C8	35.26	84.3	1.93			oleC
oprD	C1	28.29	87.99	1.95			oprD	C2	37.07	73.52	1.76	MultipleMeltPeaks		oprD	C3	30.93	81.27	1.98			oprD	C4	28.55	91.85	1.97	MultipleMeltPeaks		oprD	C5	29.12	84.27	1.95			oprD	C6	27.65	83.71	1.98	MultipleMeltPeaks		oprD	C8	27.44	86.79	1.99	MultipleMeltPeaks		oprD
oprJ	C1	27.59	91.5	1.99			oprJ	C2	31.46	88.36	1.9			oprJ	C3				NoAmplification		oprJ	C4	30.8	88.46	1.85			oprJ	C5	33.22	88.35	1.92			oprJ	C6	33.86	87.17	1.82	MultipleMeltPeaks		oprJ	C8	34.2	90.38	2.03			oprJ
pbp	C1	33.34	81.02	1.87			pbp	C2				NoAmplification		pbp	C3				NoAmplification		pbp	C4				NoAmplification		pbp	C5				NoAmplification		pbp	C6				NoAmplification		pbp	C8				CurveFitFailed		pbp
pbp2x	C1				NoAmplification		pbp2x	C2				NoAmplification		pbp2x	C3				NoAmplification		pbp2x	C4				NoAmplification		pbp2x	C5				NoAmplification		pbp2x	C6				NoAmplification		pbp2x	C8	27.02	75.43	1.81			pbp2x
Pbp5	C1				NoAmplification		Pbp5	C2				NoAmplification		Pbp5	C3				NoAmplification		Pbp5	C4				NoAmplification		Pbp5	C5				NoAmplification		Pbp5	C6				NoAmplification		Pbp5	C8				LowEfficiency, CtIsSmall, SaturationBaselineRatioIsLow, CurveFitFailed, HighBaseline		Pbp5
penA	C1	36.62	86.55	1.73	MultipleMeltPeaks		penA	C2				NoAmplification		penA	C3				NoAmplification		penA	C4				NoAmplification		penA	C5				NoAmplification		penA	C6				NoAmplification		penA	C8				NoAmplification		penA
pikR1	C1	36.93	61.46	1.69	BadR2, MultipleMeltPeaks		pikR1	C2				NoAmplification		pikR1	C3				NoAmplification		pikR1	C4				NoAmplification		pikR1	C5				NoAmplification		pikR1	C6	36.04	86.04	1.84	MultipleMeltPeaks		pikR1	C8				LowEfficiency, CtIsSmall, SaturationBaselineRatioIsLow, CurveFitFailed, HighBaseline		pikR1
pikR2	C1	31.34	84.62	2.04			pikR2	C2	39.83	91.1	1.65	MultipleMeltPeaks		pikR2	C3	31.23	84.78	2.03			pikR2	C4	30.78	85.1	2.06			pikR2	C5	35.72	85.69	1.79			pikR2	C6	30.32	84.76	2.04			pikR2	C8	29.84	84.5	2.09			pikR2
pmrA	C1	24.5	79.41	2.12			pmrA	C2	27.86	78.82	2.06			pmrA	C3				NoAmplification		pmrA	C4	27.78	79.23	2.08			pmrA	C5	33.27	78.75	2.06			pmrA	C6	25.6	78.79	2.15			pmrA	C8	23.49	79.01	2.13			pmrA
pncA	C1	29.63	89.67	1.9			pncA	C2	28.24	89.51	1.91	MultipleMeltPeaks		pncA	C3	34.07	86.25	1.9			pncA	C4	27.87	89.58	1.9			pncA	C5	32.83	89.91	1.88			pncA	C6	32.22	89.08	1.97			pncA	C8	25.64	89.64	1.96			pncA
putative multidrug	C1	31.43	84.79	1.96			putative multidrug	C2				NoAmplification		putative multidrug	C3	32.31	84.19	1.99			putative multidrug	C4	35.5	76.92	1.9	MultipleMeltPeaks		putative multidrug	C5				NoAmplification		putative multidrug	C6	37.83	77.31	1.86	MultipleMeltPeaks		putative multidrug	C8				CurveFitFailed		putative multidrug
qac	C1	33.98	78.42	1.92	MultipleMeltPeaks		qac	C2				NoAmplification		qac	C3				CurveFitFailed		qac	C4	34.27	78.68	1.96	MultipleMeltPeaks		qac	C5	38.43	81.41	1.85			qac	C6	37.65	72.19	1.9	MultipleMeltPeaks		qac	C8				LowEfficiency, CtIsSmall, SaturationBaselineRatioIsLow, CurveFitFailed, HighBaseline		qac
qacA	C1	34.25	70.97	2			qacA	C2	32.16	70.51	1.87			qacA	C3				NoAmplification		qacA	C4	34.89	70.64	1.89			qacA	C5				NoAmplification		qacA	C6				NoAmplification		qacA	C8				CurveFitFailed		qacA
qacA/qacB	C1	37.39	61.07	1.47	MultipleMeltPeaks		qacA/qacB	C2				NoAmplification		qacA/qacB	C3				NoAmplification		qacA/qacB	C4	37.2	82.93	1.44	MultipleMeltPeaks		qacA/qacB	C5				NoAmplification		qacA/qacB	C6	39.2	68.73	1.43	MultipleMeltPeaks		qacA/qacB	C8				CurveFitFailed		qacA/qacB
qacEdelta1-01	C1				NoAmplification		qacEdelta1-01	C2				NoAmplification		qacEdelta1-01	C3				NoAmplification		qacEdelta1-01	C4				NoAmplification		qacEdelta1-01	C5				NoAmplification		qacEdelta1-01	C6				NoAmplification		qacEdelta1-01	C8				LowEfficiency, CtIsSmall, SaturationBaselineRatioIsLow, CurveFitFailed, HighBaseline		qacEdelta1-01
qacEdelta1-02	C1	37.48	78.08	1.84	MultipleMeltPeaks		qacEdelta1-02	C2	34.54	83.25	1.88			qacEdelta1-02	C3	29.5	77.16	2			qacEdelta1-02	C4	35.96	75.14	1.88	MultipleMeltPeaks		qacEdelta1-02	C5	36.34	77.96	1.89	MultipleMeltPeaks		qacEdelta1-02	C6	35.11	76.16	2.01			qacEdelta1-02	C8	35.15	82.24	1.96			qacEdelta1-02
qacH-01	C1	28.05	88.39	1.88			qacH-01	C2	35.43	88.34	1.81			qacH-01	C3	38.07	82.09	1.73	MultipleMeltPeaks		qacH-01	C4	32.68	82.89	2.01	MultipleMeltPeaks		qacH-01	C5	33.86	86.36	1.9			qacH-01	C6	32.75	86.94	1.98	MultipleMeltPeaks		qacH-01	C8	31.18	83.91	1.93			qacH-01
qacH-02	C1	38.74	83.59	1.58	MultipleMeltPeaks		qacH-02	C2				NoAmplification		qacH-02	C3	36.48	82.71	1.74			qacH-02	C4	34.77	83.94	1.66			qacH-02	C5				NoAmplification		qacH-02	C6	38.27	83.87	1.56			qacH-02	C8	35.7	78.88	1.83	MultipleMeltPeaks		qacH-02
qnrA	C1	38.4	76.45	1.89			qnrA	C2				NoAmplification		qnrA	C3	35.34	73.87	2.05			qnrA	C4	35.59	73.4	2.02	MultipleMeltPeaks		qnrA	C5	40.44	73.43	1.82			qnrA	C6	38.23	81.26	1.89	MultipleMeltPeaks		qnrA	C8				CurveFitFailed		qnrA
rarD-02	C1	38.21	82.92	1.82	MultipleMeltPeaks		rarD-02	C2				NoAmplification		rarD-02	C3				NoAmplification		rarD-02	C4				NoAmplification		rarD-02	C5				NoAmplification		rarD-02	C6	37.27	85.82	1.84			rarD-02	C8				NoAmplification		rarD-02
sat4	C1				NoAmplification		sat4	C2				NoAmplification		sat4	C3				NoAmplification		sat4	C4				NoAmplification		sat4	C5				NoAmplification		sat4	C6				NoAmplification		sat4	C8				LowEfficiency, CtIsSmall, SaturationBaselineRatioIsLow, CurveFitFailed, HighBaseline		sat4
sdeB	C1				NoAmplification		sdeB	C2				NoAmplification		sdeB	C3				NoAmplification		sdeB	C4				NoAmplification		sdeB	C5				NoAmplification		sdeB	C6	37	72.33	1.95			sdeB	C8	36.43	79.96	1.88			sdeB
spcN-01	C1				NoAmplification		spcN-01	C2				NoAmplification		spcN-01	C3				NoAmplification		spcN-01	C4				NoAmplification		spcN-01	C5				NoAmplification		spcN-01	C6				NoAmplification		spcN-01	C8	37.92	89.99	1.84	MultipleMeltPeaks		spcN-01
speA	C1				NoAmplification		speA	C2				NoAmplification		speA	C3				NoAmplification		speA	C4				NoAmplification		speA	C5				NoAmplification		speA	C6				NoAmplification		speA	C8				NoAmplification		speA
str	C1				NoAmplification		str	C2				NoAmplification		str	C3				NoAmplification		str	C4				NoAmplification		str	C5				NoAmplification		str	C6				NoAmplification		str	C8				CurveFitFailed		str
strA	C1				NoAmplification		strA	C2				NoAmplification		strA	C3				CurveFitFailed		strA	C4				NoAmplification		strA	C5				NoAmplification		strA	C6				NoAmplification		strA	C8				CurveFitFailed		strA
strB	C1	37.69	85.36	1.75	MultipleMeltPeaks		strB	C2				NoAmplification		strB	C3				NoAmplification		strB	C4				NoAmplification		strB	C5				NoAmplification		strB	C6	35.58	78.92	1.95			strB	C8	36.63	78.83	1.94			strB
sul1	C1	32.7	88.56	1.84			sul1	C2				NoAmplification		sul1	C3	36.62	89.76	1.69	MultipleMeltPeaks		sul1	C4	36.88	86.52	1.68			sul1	C5				NoAmplification		sul1	C6	35.53	90.05	1.82	MultipleMeltPeaks		sul1	C8				NoAmplification		sul1
sul2	C1				CurveFitFailed		sul2	C2				NoAmplification		sul2	C3				NoAmplification		sul2	C4	38.74	64.4	1.66	MultipleMeltPeaks		sul2	C5				NoAmplification		sul2	C6	37.74	82.68	1.85	MultipleMeltPeaks		sul2	C8				LowEfficiency, CtIsSmall, SaturationBaselineRatioIsLow, CurveFitFailed, HighBaseline		sul2
sulA/folP-01	C1	20.9	81.65	1.98			sulA/folP-01	C2	24.84	81.27	1.96			sulA/folP-01	C3	29.74	81.31	1.96			sulA/folP-01	C4	25.78	81.94	2.01			sulA/folP-01	C5	27.99	81.44	1.95			sulA/folP-01	C6	23.49	81.55	2.03			sulA/folP-01	C8	21.19	81.87	1.99			sulA/folP-01
sulA/folP-03	C1	21.21	83.47	1.98			sulA/folP-03	C2	25.3	83.82	1.95			sulA/folP-03	C3	30.56	75.06	1.81			sulA/folP-03	C4	26.33	83.58	2.01			sulA/folP-03	C5	26.92	83.03	1.96			sulA/folP-03	C6	23.51	83.6	2.02			sulA/folP-03	C8	21.58	83.25	2.02			sulA/folP-03
tet(32)	C1	27.03	81.12	1.96			tet(32)	C2				NoAmplification		tet(32)	C3				NoAmplification		tet(32)	C4	25.62	81.27	1.99			tet(32)	C5	28.03	81.12	1.98			tet(32)	C6				NoAmplification		tet(32)	C8	28.32	81.09	1.99			tet(32)
tet(34)	C1	30.99	75.71	2			tet(34)	C2	30.92	75.53	2			tet(34)	C3	30.46	75.88	2.02			tet(34)	C4	32.53	75.41	1.99			tet(34)	C5	31.42	75.46	1.98			tet(34)	C6	32.72	75.36	1.98			tet(34)	C8	30.7	75.78	2			tet(34)
tet(35)	C1				NoAmplification		tet(35)	C2				NoAmplification		tet(35)	C3				NoAmplification		tet(35)	C4				NoAmplification		tet(35)	C5				NoAmplification		tet(35)	C6				NoAmplification		tet(35)	C8				NoAmplification		tet(35)
tet(36)-A	C1	38.43	61.85	2.4	BadR2, MultipleMeltPeaks		tet(36)-A	C2				NoAmplification		tet(36)-A	C3				NoAmplification		tet(36)-A	C4				NoAmplification		tet(36)-A	C5				NoAmplification		tet(36)-A	C6				NoAmplification		tet(36)-A	C8	34.04	88.15	1.91			tet(36)-A
tet(36)-B	C1				NoAmplification		tet(36)-B	C2				NoAmplification		tet(36)-B	C3				NoAmplification		tet(36)-B	C4				NoAmplification		tet(36)-B	C5				NoAmplification		tet(36)-B	C6				NoAmplification		tet(36)-B	C8				LowEfficiency, CtIsSmall, SaturationBaselineRatioIsLow, CurveFitFailed, HighBaseline		tet(36)-B
tet(37)	C1	23.82	76.5	2			tet(37)	C2				NoAmplification		tet(37)	C3	36.81	83.1	1.84			tet(37)	C4	30.71	80.69	2.01			tet(37)	C5				CurveFitFailed		tet(37)	C6	27.9	76.28	1.97			tet(37)	C8	33.57	78.53	1.98	MultipleMeltPeaks		tet(37)
tetA-01	C1	30.05	85.06	1.93			tetA-01	C2				NoAmplification		tetA-01	C3	34.1	85.08	1.91			tetA-01	C4	31.7	85.12	1.93			tetA-01	C5	30.93	85.11	1.92			tetA-01	C6	30.59	85.13	1.92			tetA-01	C8	30.16	85.11	1.95			tetA-01
tetA-02	C1	37.75	89.08	1.76	MultipleMeltPeaks		tetA-02	C2				NoAmplification		tetA-02	C3				NoAmplification		tetA-02	C4	32.29	88.04	1.91			tetA-02	C5				NoAmplification		tetA-02	C6	34.75	89.85	1.92			tetA-02	C8	37.21	88.05	1.93			tetA-02
tetB-01	C1	29.12	86.01	1.98			tetB-01	C2	38.61	82.02	1.71	MultipleMeltPeaks		tetB-01	C3	27.81	79.68	1.97			tetB-01	C4	26.32	79.42	1.97	MultipleMeltPeaks		tetB-01	C5	33.02	86.1	1.98			tetB-01	C6	29.9	86.35	1.95	MultipleMeltPeaks		tetB-01	C8	33.63	85.98	2.02			tetB-01
tetB-02	C1	40.05	76.37	1.71			tetB-02	C2				NoAmplification		tetB-02	C3				NoAmplification		tetB-02	C4	24.34	79.69	2.02			tetB-02	C5				NoAmplification		tetB-02	C6				NoAmplification		tetB-02	C8	32.78	83.48	1.96			tetB-02
tetC-01	C1				NoAmplification		tetC-01	C2				NoAmplification		tetC-01	C3	28.97	75.3	2.03			tetC-01	C4				NoAmplification		tetC-01	C5				NoAmplification		tetC-01	C6				NoAmplification		tetC-01	C8				NoAmplification		tetC-01
tetC-02	C1	27.51	76.05	2.04			tetC-02	C2				NoAmplification		tetC-02	C3				NoAmplification		tetC-02	C4	24.46	76.23	2.07			tetC-02	C5				NoAmplification		tetC-02	C6				NoAmplification		tetC-02	C8				CurveFitFailed		tetC-02
tetD-01	C1				NoAmplification		tetD-01	C2				NoAmplification		tetD-01	C3				NoAmplification		tetD-01	C4				NoAmplification		tetD-01	C5				NoAmplification		tetD-01	C6				NoAmplification		tetD-01	C8				CurveFitFailed		tetD-01
tetD-02	C1	37.9	75.76	1.8			tetD-02	C2	34.31	76.44	2.07			tetD-02	C3	38.93	75.82	1.82			tetD-02	C4				NoAmplification		tetD-02	C5				NoAmplification		tetD-02	C6	32.23	77.79	1.96			tetD-02	C8	33.72	85.77	1.76	MultipleMeltPeaks		tetD-02
tetE	C1				NoAmplification		tetE	C2				NoAmplification		tetE	C3				NoAmplification		tetE	C4	38.27	82.81	2			tetE	C5				NoAmplification		tetE	C6				NoAmplification		tetE	C8				LowEfficiency, CtIsSmall, SaturationBaselineRatioIsLow, CurveFitFailed, HighBaseline		tetE
tetG-01	C1	33.14	86.37	1.91			tetG-01	C2				NoAmplification		tetG-01	C3	33.74	82.42	1.96	MultipleMeltPeaks		tetG-01	C4	34.49	76.51	1.86	MultipleMeltPeaks		tetG-01	C5	38.01	63.68	1.91	MultipleMeltPeaks		tetG-01	C6	33.49	82.28	1.99	MultipleMeltPeaks		tetG-01	C8	31.87	82.04	2	MultipleMeltPeaks		tetG-01
tetG-02	C1	31.96	89.67	1.84			tetG-02	C2	34.63	87	1.83			tetG-02	C3				NoAmplification		tetG-02	C4	37.71	84.64	1.8	MultipleMeltPeaks		tetG-02	C5	38.88	77.93	1.77			tetG-02	C6	37.22	84.49	1.82	MultipleMeltPeaks		tetG-02	C8	34.87	89.83	1.92			tetG-02
tetH	C1				NoAmplification		tetH	C2				NoAmplification		tetH	C3				NoAmplification		tetH	C4				NoAmplification		tetH	C5				NoAmplification		tetH	C6				NoAmplification		tetH	C8				CurveFitFailed		tetH
tetJ	C1				NoAmplification		tetJ	C2				NoAmplification		tetJ	C3				NoAmplification		tetJ	C4				NoAmplification		tetJ	C5				NoAmplification		tetJ	C6	35.08	80.12	1.94			tetJ	C8				LowEfficiency, CtIsSmall, SaturationBaselineRatioIsLow, CurveFitFailed, HighBaseline		tetJ
tetK	C1				NoAmplification		tetK	C2				NoAmplification		tetK	C3				NoAmplification		tetK	C4				NoAmplification		tetK	C5				NoAmplification		tetK	C6				NoAmplification		tetK	C8				CurveFitFailed		tetK
tetL-01	C1				CurveFitFailed		tetL-01	C2				NoAmplification		tetL-01	C3				NoAmplification		tetL-01	C4				NoAmplification		tetL-01	C5				NoAmplification		tetL-01	C6	40.8	79.77	1.64	MultipleMeltPeaks		tetL-01	C8				LowEfficiency, CtIsSmall, SaturationBaselineRatioIsLow, CurveFitFailed, HighBaseline		tetL-01
tetL-02	C1	35.51	85.29	1.75			tetL-02	C2	38.53	85.18	1.69			tetL-02	C3	37.9	85.43	1.64			tetL-02	C4	32.02	85.27	1.87			tetL-02	C5	33.54	85.31	1.78			tetL-02	C6	30.37	85.28	1.84			tetL-02	C8	31.42	85.29	1.83			tetL-02
tetM-01	C1	23.92	76.09	2			tetM-01	C2	25.36	76	1.99			tetM-01	C3	33.86	73.63	2.03	MultipleMeltPeaks		tetM-01	C4	25.61	76.2	2.01			tetM-01	C5	26.62	76.27	1.98			tetM-01	C6	25.34	76.02	2.03			tetM-01	C8	22.25	76.13	2.01			tetM-01
tetM-02	C1	24.75	77.62	2.05			tetM-02	C2	26.99	77.45	1.97			tetM-02	C3				NoAmplification		tetM-02	C4	25.47	77.56	2.04			tetM-02	C5	24.93	77.69	2.02			tetM-02	C6	25.14	77.48	2.05			tetM-02	C8	22.31	77.59	2.05			tetM-02
tetO-01	C1	25.03	76.88	2.04			tetO-01	C2				NoAmplification		tetO-01	C3				NoAmplification		tetO-01	C4	28.3	76.84	2.04			tetO-01	C5	29.4	76.79	2.06			tetO-01	C6				NoAmplification		tetO-01	C8	27.84	76.81	2.07			tetO-01
tetPA	C1				NoAmplification		tetPA	C2				NoAmplification		tetPA	C3				NoAmplification		tetPA	C4				NoAmplification		tetPA	C5				NoAmplification		tetPA	C6				NoAmplification		tetPA	C8				CurveFitFailed		tetPA
tetPB-01	C1				NoAmplification		tetPB-01	C2				NoAmplification		tetPB-01	C3	39.19	83.53	1.78			tetPB-01	C4	37.76	83.6	1.88			tetPB-01	C5	38.42	87.91	1.78			tetPB-01	C6				NoAmplification		tetPB-01	C8	37.24	83.45	1.91	MultipleMeltPeaks		tetPB-01
tetPB-02	C1	29.75	84.97	1.99			tetPB-02	C2				CurveFitFailed		tetPB-02	C3	30.39	85.03	2.04			tetPB-02	C4	29.6	85.06	2.04			tetPB-02	C5	30.2	85.11	2.03			tetPB-02	C6	28.66	85.13	2.11			tetPB-02	C8	29.02	85.15	2.09			tetPB-02
tetPB-03	C1				NoAmplification		tetPB-03	C2				NoAmplification		tetPB-03	C3				NoAmplification		tetPB-03	C4				NoAmplification		tetPB-03	C5				NoAmplification		tetPB-03	C6				NoAmplification		tetPB-03	C8				LowEfficiency, CtIsSmall, SaturationBaselineRatioIsLow, CurveFitFailed, HighBaseline		tetPB-03
tetPB-05	C1				LowEfficiency, CtIsSmall, SaturationBaselineRatioIsLow, CurveFitFailed, HighBaseline		tetPB-05	C2				NoAmplification		tetPB-05	C3				NoAmplification		tetPB-05	C4				CurveFitFailed		tetPB-05	C5				NoAmplification		tetPB-05	C6				NoAmplification		tetPB-05	C8				CurveFitFailed		tetPB-05
tetQ	C1	31.4	76.87	2.01			tetQ	C2	26.33	75.71	1.98			tetQ	C3				NoAmplification		tetQ	C4	36.39	76.82	1.91			tetQ	C5	28.24	75.96	2.02			tetQ	C6	26.17	75.95	2.03			tetQ	C8	24.43	77	2.1			tetQ
tetR-02	C1	32.17	89.77	1.87			tetR-02	C2	31.48	83.24	1.8			tetR-02	C3	35.32	79.86	1.9	MultipleMeltPeaks		tetR-02	C4	31.19	84.71	1.95			tetR-02	C5	35.56	84.77	1.83	MultipleMeltPeaks		tetR-02	C6	31.78	89.11	1.85			tetR-02	C8	32.61	88.05	1.89	MultipleMeltPeaks		tetR-02
tetR-03	C1	28.2	76	1.98			tetR-03	C2				NoAmplification		tetR-03	C3				NoAmplification		tetR-03	C4	25.4	76.14	2			tetR-03	C5				NoAmplification		tetR-03	C6	28.35	76.04	2			tetR-03	C8				CurveFitFailed		tetR-03
tetS	C1				NoAmplification		tetS	C2				NoAmplification		tetS	C3	37.8	85.25	1.83			tetS	C4				LowEfficiency, CtIsSmall, SaturationBaselineRatioIsLow, CurveFitFailed		tetS	C5	36.71	87.33	1.88	MultipleMeltPeaks		tetS	C6	35.12	85.25	2.09			tetS	C8	35.41	75.8	2.16	MultipleMeltPeaks		tetS
tetT	C1				NoAmplification		tetT	C2				NoAmplification		tetT	C3				NoAmplification		tetT	C4				NoAmplification		tetT	C5				NoAmplification		tetT	C6				NoAmplification		tetT	C8				CurveFitFailed		tetT
tetU-01	C1				NoAmplification		tetU-01	C2				NoAmplification		tetU-01	C3				NoAmplification		tetU-01	C4				NoAmplification		tetU-01	C5				NoAmplification		tetU-01	C6				NoAmplification		tetU-01	C8				LowEfficiency, CtIsSmall, SaturationBaselineRatioIsLow, CurveFitFailed, HighBaseline		tetU-01
tetV	C1				NoAmplification		tetV	C2				NoAmplification		tetV	C3				NoAmplification		tetV	C4				NoAmplification		tetV	C5				NoAmplification		tetV	C6				NoAmplification		tetV	C8				LowEfficiency, CtIsSmall, SaturationBaselineRatioIsLow, CurveFitFailed, HighBaseline		tetV
tetW-01	C1	26.05	81.89	1.98			tetW-01	C2				NoAmplification		tetW-01	C3				NoAmplification		tetW-01	C4				NoAmplification		tetW-01	C5				NoAmplification		tetW-01	C6	36.01	64.32	1.97	SaturationBaselineRatioIsLow, MultipleMeltPeaks		tetW-01	C8	22.69	81.97	2.04			tetW-01
tetX	C1				NoAmplification		tetX	C2				NoAmplification		tetX	C3				NoAmplification		tetX	C4				BadR2, CtIsSmall, SaturationBaselineRatioIsLow, CurveFitFailed		tetX	C5				NoAmplification		tetX	C6	40.14	81.83	1.74			tetX	C8	36.82	81.95	2.02			tetX
tnpA-01	C1				NoAmplification		tnpA-01	C2				NoAmplification		tnpA-01	C3				NoAmplification		tnpA-01	C4				NoAmplification		tnpA-01	C5				NoAmplification		tnpA-01	C6				NoAmplification		tnpA-01	C8	32.3	83.09	1.95			tnpA-01
tnpA-02	C1	29.7	86.55	1.81			tnpA-02	C2				NoAmplification		tnpA-02	C3	37.59	84.5	1.66			tnpA-02	C4	31.54	87.09	1.8			tnpA-02	C5				NoAmplification		tnpA-02	C6	33.21	85.36	1.8			tnpA-02	C8	35.08	84.75	1.75			tnpA-02
tnpA-03	C1	28.53	77.59	2.09			tnpA-03	C2	28.85	77.49	2.08			tnpA-03	C3	35.04	74.34	2.1			tnpA-03	C4	29.41	77.71	2.06			tnpA-03	C5	23.79	77.99	2.1			tnpA-03	C6	35.49	75.17	2.11			tnpA-03	C8	32.16	75.13	2.1			tnpA-03
tnpA-04	C1	38.3	61.81	1.78	MultipleMeltPeaks		tnpA-04	C2				NoAmplification		tnpA-04	C3				NoAmplification		tnpA-04	C4				NoAmplification		tnpA-04	C5				NoAmplification		tnpA-04	C6	40.37	78.47	1.76			tnpA-04	C8				CurveFitFailed		tnpA-04
tnpA-05	C1	33.18	83.07	1.9			tnpA-05	C2				NoAmplification		tnpA-05	C3	37.27	76.28	1.86			tnpA-05	C4	34.48	82.62	1.88			tnpA-05	C5				CurveFitFailed		tnpA-05	C6				NoAmplification		tnpA-05	C8				CurveFitFailed		tnpA-05
tnpA-07	C1	38.45	75.99	1.77	MultipleMeltPeaks		tnpA-07	C2				NoAmplification		tnpA-07	C3				NoAmplification		tnpA-07	C4				NoAmplification		tnpA-07	C5				NoAmplification		tnpA-07	C6				NoAmplification		tnpA-07	C8				LowEfficiency, CtIsSmall, CurveFitFailed, HighBaseline		tnpA-07
tolC-01	C1	35.42	80.27	1.84			tolC-01	C2				NoAmplification		tolC-01	C3	37.13	78.87	1.74			tolC-01	C4	38.4	80.27	1.75	MultipleMeltPeaks		tolC-01	C5	36.47	81.06	1.79	MultipleMeltPeaks		tolC-01	C6	38.67	80.4	1.74			tolC-01	C8				LowEfficiency, CtIsSmall, SaturationBaselineRatioIsLow, CurveFitFailed, HighBaseline		tolC-01
tolC-02	C1	30.62	84.54	1.93			tolC-02	C2	37.2	83.52	1.77			tolC-02	C3	33.21	85.12	1.92			tolC-02	C4	31.25	83.38	1.97	MultipleMeltPeaks		tolC-02	C5	31.32	83.65	1.94			tolC-02	C6	31.11	83.59	1.95	MultipleMeltPeaks		tolC-02	C8	30.84	84.78	1.97	MultipleMeltPeaks		tolC-02
tolC-03	C1	31.24	85.72	1.91	MultipleMeltPeaks		tolC-03	C2	36.43	87.49	1.87			tolC-03	C3	33.21	85.95	1.94			tolC-03	C4	30.95	86.02	1.91			tolC-03	C5	33.01	86.09	1.88			tolC-03	C6	31.13	87.2	1.95	MultipleMeltPeaks		tolC-03	C8	29.94	87.54	1.96			tolC-03
Tp614	C1	31.64	83.53	1.91			Tp614	C2				NoAmplification		Tp614	C3	39.12	83.01	1.78	MultipleMeltPeaks		Tp614	C4	37.78	78.85	1.87	MultipleMeltPeaks		Tp614	C5	38.79	74.23	1.8	MultipleMeltPeaks		Tp614	C6	37.44	82.55	1.82	MultipleMeltPeaks		Tp614	C8				CurveFitFailed		Tp614
ttgA	C1	39.75	81.52	1.82			ttgA	C2				NoAmplification		ttgA	C3				NoAmplification		ttgA	C4				NoAmplification		ttgA	C5				CurveFitFailed		ttgA	C6				NoAmplification		ttgA	C8	37.35	87.29	1.84			ttgA
ttgB	C1				CurveFitFailed		ttgB	C2				NoAmplification		ttgB	C3	35.55	74.28	1.98			ttgB	C4	35.79	80.94	1.9	MultipleMeltPeaks		ttgB	C5	37.94	81.53	1.81			ttgB	C6	37.31	79.11	1.82	MultipleMeltPeaks		ttgB	C8	36.92	87.98	1.89	MultipleMeltPeaks		ttgB
vanA	C1				NoAmplification		vanA	C2				NoAmplification		vanA	C3				NoAmplification		vanA	C4				NoAmplification		vanA	C5				NoAmplification		vanA	C6				NoAmplification		vanA	C8				NoAmplification		vanA
vanB-01	C1	30.71	88.63	2.01	MultipleMeltPeaks		vanB-01	C2	36.44	80.72	1.9			vanB-01	C3	37.47	84.4	1.98	MultipleMeltPeaks		vanB-01	C4	33.81	83.44	2.01			vanB-01	C5	37.25	82.74	1.79			vanB-01	C6	32.78	83.81	1.98			vanB-01	C8	31.56	82.73	1.96			vanB-01
vanC-01	C1				NoAmplification		vanC-01	C2				NoAmplification		vanC-01	C3				NoAmplification		vanC-01	C4				NoAmplification		vanC-01	C5	27.44	74.1	2.07			vanC-01	C6				NoAmplification		vanC-01	C8				LowEfficiency, CtIsSmall, SaturationBaselineRatioIsLow, CurveFitFailed, HighBaseline		vanC-01
vanC-02	C1				NoAmplification		vanC-02	C2				NoAmplification		vanC-02	C3				NoAmplification		vanC-02	C4				NoAmplification		vanC-02	C5				NoAmplification		vanC-02	C6				NoAmplification		vanC-02	C8				LowEfficiency, CtIsSmall, SaturationBaselineRatioIsLow, CurveFitFailed, HighBaseline		vanC-02
vanC-03	C1	32.51	91.5	1.91	MultipleMeltPeaks		vanC-03	C2	30.34	77.5	1.95			vanC-03	C3	35.11	85.08	1.82			vanC-03	C4	30.02	86.11	1.89			vanC-03	C5	32.48	78.58	1.92			vanC-03	C6	28.68	85.88	1.91			vanC-03	C8	30.26	86.2	1.93			vanC-03
vanC1	C1				NoAmplification		vanC1	C2				NoAmplification		vanC1	C3				NoAmplification		vanC1	C4				NoAmplification		vanC1	C5				NoAmplification		vanC1	C6				NoAmplification		vanC1	C8				CurveFitFailed		vanC1
vanC2/vanC3	C1	33.17	83.17	2.15			vanC2/vanC3	C2	33.64	77.02	2.17			vanC2/vanC3	C3				NoAmplification		vanC2/vanC3	C4	36.2	89.66	1.79			vanC2/vanC3	C5	34.94	82.83	1.94			vanC2/vanC3	C6	36.69	78.73	1.79	MultipleMeltPeaks		vanC2/vanC3	C8	37.98	77.45	1.82	MultipleMeltPeaks		vanC2/vanC3
vanG	C1				NoAmplification		vanG	C2				NoAmplification		vanG	C3				NoAmplification		vanG	C4				NoAmplification		vanG	C5				NoAmplification		vanG	C6				NoAmplification		vanG	C8				CurveFitFailed		vanG
vanHB	C1	33.17	78.63	1.98	MultipleMeltPeaks		vanHB	C2	35.93	85.49	1.76			vanHB	C3				NoAmplification		vanHB	C4	35.17	82.1	1.91			vanHB	C5	37.79	87.38	1.78	MultipleMeltPeaks		vanHB	C6	31.97	79.19	1.96			vanHB	C8	35.91	86.86	1.86	MultipleMeltPeaks		vanHB
vanHD	C1	37.61	83.89	1.69			vanHD	C2				NoAmplification		vanHD	C3	34.87	82.83	1.9			vanHD	C4				CurveFitFailed		vanHD	C5	38.34	73.99	1.78	MultipleMeltPeaks		vanHD	C6	33.26	82.84	1.98			vanHD	C8	35.59	78.32	1.93			vanHD
vanRA-01	C1				NoAmplification		vanRA-01	C2				NoAmplification		vanRA-01	C3				NoAmplification		vanRA-01	C4				NoAmplification		vanRA-01	C5				NoAmplification		vanRA-01	C6				NoAmplification		vanRA-01	C8				CurveFitFailed		vanRA-01
vanRA-02	C1				NoAmplification		vanRA-02	C2				NoAmplification		vanRA-02	C3				NoAmplification		vanRA-02	C4				NoAmplification		vanRA-02	C5				NoAmplification		vanRA-02	C6				NoAmplification		vanRA-02	C8				LowEfficiency, CtIsSmall, CurveFitFailed, HighBaseline		vanRA-02
vanRB	C1	39.3	87.59	1.72	MultipleMeltPeaks		vanRB	C2				NoAmplification		vanRB	C3	35.45	87.44	1.84			vanRB	C4	31.78	87.41	1.94	MultipleMeltPeaks		vanRB	C5	35.37	87.4	1.83			vanRB	C6	33.6	87.6	2			vanRB	C8	33.18	81.68	1.9			vanRB
vanRC	C1				NoAmplification		vanRC	C2				NoAmplification		vanRC	C3				NoAmplification		vanRC	C4				NoAmplification		vanRC	C5				NoAmplification		vanRC	C6				NoAmplification		vanRC	C8				LowEfficiency, CtIsSmall, SaturationBaselineRatioIsLow, CurveFitFailed, HighBaseline		vanRC
vanRC4	C1				NoAmplification		vanRC4	C2				NoAmplification		vanRC4	C3				NoAmplification		vanRC4	C4				NoAmplification		vanRC4	C5				NoAmplification		vanRC4	C6				NoAmplification		vanRC4	C8				CurveFitFailed		vanRC4
vanRD	C1				NoAmplification		vanRD	C2				NoAmplification		vanRD	C3				NoAmplification		vanRD	C4				NoAmplification		vanRD	C5				NoAmplification		vanRD	C6				NoAmplification		vanRD	C8				BadR2, LowEfficiency, CtIsSmall, SaturationBaselineRatioIsLow, CurveFitFailed, HighBaseline		vanRD
vanSA	C1				NoAmplification		vanSA	C2				NoAmplification		vanSA	C3				NoAmplification		vanSA	C4				NoAmplification		vanSA	C5				NoAmplification		vanSA	C6				NoAmplification		vanSA	C8				LowEfficiency, CtIsSmall, SaturationBaselineRatioIsLow, CurveFitFailed, HighBaseline		vanSA
vanSB	C1	28.82	74.74	2.05			vanSB	C2	30.28	74.32	2.06			vanSB	C3	30.13	74.57	2.08			vanSB	C4	31.28	74.52	2.02			vanSB	C5	29.05	74.69	2.09			vanSB	C6	29.88	74.65	2.07			vanSB	C8	28.52	74.66	2.04			vanSB
vanSC-01	C1	35	84.01	1.92			vanSC-01	C2				NoAmplification		vanSC-01	C3	39.01	84.18	1.76			vanSC-01	C4	33.44	84	2.02			vanSC-01	C5	36.54	84.02	1.88			vanSC-01	C6	36.19	84.19	1.9			vanSC-01	C8	33	84.07	2.03			vanSC-01
vanSC-02	C1				NoAmplification		vanSC-02	C2	33.67	75.59	1.99			vanSC-02	C3				NoAmplification		vanSC-02	C4				NoAmplification		vanSC-02	C5				NoAmplification		vanSC-02	C6				NoAmplification		vanSC-02	C8				NoAmplification		vanSC-02
vanTC-01	C1				NoAmplification		vanTC-01	C2				NoAmplification		vanTC-01	C3				NoAmplification		vanTC-01	C4				NoAmplification		vanTC-01	C5				NoAmplification		vanTC-01	C6				NoAmplification		vanTC-01	C8				CurveFitFailed		vanTC-01
vanTC-02	C1	34.33	82.5	1.87			vanTC-02	C2				NoAmplification		vanTC-02	C3				NoAmplification		vanTC-02	C4	35.66	86.67	1.77			vanTC-02	C5	38.66	77.1	1.74			vanTC-02	C6				NoAmplification		vanTC-02	C8	36.69	86.71	1.74			vanTC-02
vanTE	C1				NoAmplification		vanTE	C2				NoAmplification		vanTE	C3				NoAmplification		vanTE	C4	39.13	78.29	1.73	MultipleMeltPeaks		vanTE	C5				NoAmplification		vanTE	C6				NoAmplification		vanTE	C8	37.27	89.34	1.88			vanTE
vanTG	C1	38.53	73.9	1.86			vanTG	C2	39.73	73.22	1.82			vanTG	C3				NoAmplification		vanTG	C4				NoAmplification		vanTG	C5				NoAmplification		vanTG	C6				NoAmplification		vanTG	C8				CurveFitFailed		vanTG
vanWB	C1				NoAmplification		vanWB	C2				NoAmplification		vanWB	C3				NoAmplification		vanWB	C4				NoAmplification		vanWB	C5				NoAmplification		vanWB	C6				NoAmplification		vanWB	C8				BadR2, LowEfficiency, CtIsSmall, CurveFitFailed		vanWB
vanWG	C1	38.01	74.29	1.89			vanWG	C2				CurveFitFailed		vanWG	C3	36.69	74.25	1.91			vanWG	C4	38.46	74.61	1.91			vanWG	C5	36.98	74.22	1.89			vanWG	C6				NoAmplification		vanWG	C8	34.32	74.51	2.02			vanWG
vanXA	C1	35.3	74.71	1.93			vanXA	C2	39.53	72.88	1.65			vanXA	C3	39.65	73.37	1.65	MultipleMeltPeaks		vanXA	C4				CurveFitFailed		vanXA	C5				CurveFitFailed		vanXA	C6	37.81	77.33	1.88	MultipleMeltPeaks		vanXA	C8				LowEfficiency, CtIsSmall, CurveFitFailed, HighBaseline		vanXA
vanXB	C1				NoAmplification		vanXB	C2				NoAmplification		vanXB	C3				NoAmplification		vanXB	C4				NoAmplification		vanXB	C5				NoAmplification		vanXB	C6				NoAmplification		vanXB	C8				NoAmplification		vanXB
vanXD	C1	32.59	75.16	2.03			vanXD	C2	30.04	75.75	1.99			vanXD	C3	33.92	74.41	2.04			vanXD	C4	32.31	75.39	2.03			vanXD	C5	30.61	75.2	1.93			vanXD	C6	31.86	75.34	2			vanXD	C8	31.57	75.32	1.99			vanXD
vanYB	C1				NoAmplification		vanYB	C2				NoAmplification		vanYB	C3	35.46	79.94	1.91			vanYB	C4	37.18	61.56	2.06	MultipleMeltPeaks		vanYB	C5				NoAmplification		vanYB	C6				NoAmplification		vanYB	C8				CurveFitFailed		vanYB
vanYD-01	C1	38.53	75.54	1.74			vanYD-01	C2	36.31	88.67	1.8	MultipleMeltPeaks		vanYD-01	C3	35.29	80.89	1.87	MultipleMeltPeaks		vanYD-01	C4	31.55	81.87	1.8			vanYD-01	C5	36.5	80.92	1.82			vanYD-01	C6	32.99	81.79	1.75			vanYD-01	C8	30.75	81.83	1.79			vanYD-01
vanYD-02	C1				NoAmplification		vanYD-02	C2				NoAmplification		vanYD-02	C3				NoAmplification		vanYD-02	C4				NoAmplification		vanYD-02	C5				NoAmplification		vanYD-02	C6				NoAmplification		vanYD-02	C8				CurveFitFailed		vanYD-02
vatB-01	C1				NoAmplification		vatB-01	C2				NoAmplification		vatB-01	C3				NoAmplification		vatB-01	C4				NoAmplification		vatB-01	C5	39.32	74.92	1.81			vatB-01	C6				NoAmplification		vatB-01	C8	35.2	74.91	1.99			vatB-01
vatB-02	C1	39.13	74.84	1.77	MultipleMeltPeaks		vatB-02	C2				NoAmplification		vatB-02	C3	37.49	79.6	1.78			vatB-02	C4				CurveFitFailed		vatB-02	C5				NoAmplification		vatB-02	C6	39.27	62.24	1.7	BadR2, MultipleMeltPeaks		vatB-02	C8				LowEfficiency, CtIsSmall, SaturationBaselineRatioIsLow, CurveFitFailed, HighBaseline		vatB-02
vatC-01	C1	35.92	73.84	1.88			vatC-01	C2				NoAmplification		vatC-01	C3				NoAmplification		vatC-01	C4				NoAmplification		vatC-01	C5	37.77	81.27	1.8			vatC-01	C6	34.27	81.29	1.9			vatC-01	C8				LowEfficiency, CtIsSmall, SaturationBaselineRatioIsLow, CurveFitFailed, HighBaseline		vatC-01
vatC-02	C1	42.93	61.92	1.72	MultipleMeltPeaks		vatC-02	C2				NoAmplification		vatC-02	C3	37.91	83.24	1.83			vatC-02	C4	32.31	87.58	1.92			vatC-02	C5	39.26	62.01	1.77	MultipleMeltPeaks		vatC-02	C6	36.94	83.21	1.84	MultipleMeltPeaks		vatC-02	C8	33.6	87.58	1.91			vatC-02
vatE-01	C1	28.99	77.12	2.14			vatE-01	C2	28.58	77.08	2.11			vatE-01	C3	29.33	77.19	2.11			vatE-01	C4	28.62	76.94	2.12			vatE-01	C5	30.06	76.86	2.11			vatE-01	C6	29.58	76.72	2.09			vatE-01	C8	30.22	76.39	2.11			vatE-01
vatE-02	C1				NoAmplification		vatE-02	C2	34.79	76.12	2.12			vatE-02	C3				NoAmplification		vatE-02	C4				NoAmplification		vatE-02	C5	37.93	75.65	1.92			vatE-02	C6				NoAmplification		vatE-02	C8				NoAmplification		vatE-02
vgaA-01	C1				LowEfficiency, CtIsSmall, SaturationBaselineRatioIsLow, CurveFitFailed, HighBaseline		vgaA-01	C2				NoAmplification		vgaA-01	C3	39.14	74.86	1.8			vgaA-01	C4	35.79	76.33	1.94			vgaA-01	C5	39.83	75.48	1.7			vgaA-01	C6				NoAmplification		vgaA-01	C8				LowEfficiency, CtIsSmall, SaturationBaselineRatioIsLow, CurveFitFailed, HighBaseline		vgaA-01
vgaA-02	C1				CurveFitFailed		vgaA-02	C2				NoAmplification		vgaA-02	C3				NoAmplification		vgaA-02	C4				CurveFitFailed		vgaA-02	C5				CurveFitFailed		vgaA-02	C6	37.34	79.94	1.88			vgaA-02	C8				LowEfficiency, CtIsSmall, SaturationBaselineRatioIsLow, CurveFitFailed, HighBaseline		vgaA-02
vgb-01	C1	31.5	87.43	1.94			vgb-01	C2	39.72	82.82	1.72			vgb-01	C3				NoAmplification		vgb-01	C4	38.42	73.49	1.87			vgb-01	C5				NoAmplification		vgb-01	C6				NoAmplification		vgb-01	C8				CurveFitFailed		vgb-01
vgbB-01	C1	37.53	76.41	1.72	MultipleMeltPeaks		vgbB-01	C2				NoAmplification		vgbB-01	C3	39.38	61.75	1.69	MultipleMeltPeaks		vgbB-01	C4	37.49	76.49	1.71			vgbB-01	C5				NoAmplification		vgbB-01	C6				NoAmplification		vgbB-01	C8				CurveFitFailed		vgbB-01
vgbB-02	C1				NoAmplification		vgbB-02	C2				NoAmplification		vgbB-02	C3				NoAmplification		vgbB-02	C4				NoAmplification		vgbB-02	C5				NoAmplification		vgbB-02	C6				NoAmplification		vgbB-02	C8				CurveFitFailed		vgbB-02
yceE/mdtG-01	C1				NoAmplification		yceE/mdtG-01	C2				NoAmplification		yceE/mdtG-01	C3	38.72	77.8	1.9			yceE/mdtG-01	C4	38.34	77.69	1.79			yceE/mdtG-01	C5				NoAmplification		yceE/mdtG-01	C6				NoAmplification		yceE/mdtG-01	C8				BadR2, LowEfficiency, CtIsSmall, SaturationBaselineRatioIsLow, CurveFitFailed, HighBaseline		yceE/mdtG-01
yceE/mdtG-02	C1	37.41	81.09	1.83			yceE/mdtG-02	C2				NoAmplification		yceE/mdtG-02	C3	43.77	81.48	1.68	MultipleMeltPeaks		yceE/mdtG-02	C4	39.66	81.47	1.73	MultipleMeltPeaks		yceE/mdtG-02	C5	34.25	82.83	1.92			yceE/mdtG-02	C6	37.11	81.15	1.87			yceE/mdtG-02	C8				CurveFitFailed		yceE/mdtG-02
yceL/mdtH-01	C1	32.9	87.36	1.93			yceL/mdtH-01	C2				NoAmplification		yceL/mdtH-01	C3	37.95	85.18	1.8			yceL/mdtH-01	C4	29.89	84.56	1.93			yceL/mdtH-01	C5				CurveFitFailed		yceL/mdtH-01	C6	31.72	87.58	1.95	MultipleMeltPeaks		yceL/mdtH-01	C8	32.21	83.88	1.96	MultipleMeltPeaks		yceL/mdtH-01
yceL/mdtH-02	C1				NoAmplification		yceL/mdtH-02	C2				NoAmplification		yceL/mdtH-02	C3				NoAmplification		yceL/mdtH-02	C4				NoAmplification		yceL/mdtH-02	C5				NoAmplification		yceL/mdtH-02	C6				NoAmplification		yceL/mdtH-02	C8				LowEfficiency, CtIsSmall, CurveFitFailed, HighBaseline		yceL/mdtH-02
yceL/mdtH-03	C1				CurveFitFailed		yceL/mdtH-03	C2				NoAmplification		yceL/mdtH-03	C3				NoAmplification		yceL/mdtH-03	C4	36.55	88.68	1.82			yceL/mdtH-03	C5				NoAmplification		yceL/mdtH-03	C6	38.05	74.06	1.92	MultipleMeltPeaks		yceL/mdtH-03	C8	36.63	78.44	1.89			yceL/mdtH-03
yidY/mdtL-01	C1	32.28	86.87	1.94	MultipleMeltPeaks		yidY/mdtL-01	C2				CurveFitFailed		yidY/mdtL-01	C3	30.14	75.93	1.96	MultipleMeltPeaks		yidY/mdtL-01	C4	31.3	82.7	1.96			yidY/mdtL-01	C5	30.79	84.76	1.96			yidY/mdtL-01	C6	31.67	88.82	1.95			yidY/mdtL-01	C8	29.46	82.86	1.98			yidY/mdtL-01
yidY/mdtL-02	C1	37.56	82.08	1.88			yidY/mdtL-02	C2				NoAmplification		yidY/mdtL-02	C3				NoAmplification		yidY/mdtL-02	C4	36.45	75.23	1.96			yidY/mdtL-02	C5	37.05	74.9	1.94			yidY/mdtL-02	C6	42.53	76.65	1.66			yidY/mdtL-02	C8				LowEfficiency, CtIsSmall, SaturationBaselineRatioIsLow, CurveFitFailed, HighBaseline		yidY/mdtL-02
[truncated: 131 more columns]

## Sheet: EVA
Assay	Sample	Ct	Tm	Efficiency	Flags		Assay	Sample	Ct	Tm	Efficiency	Flags		Assay	Sample	Ct	Tm	Efficiency	Flags		Assay	Sample	Ct	Tm	Efficiency	Flags		Assay	Sample	Ct	Tm	Efficiency	Flags		Assay	Sample	Ct	Tm	Efficiency	Flags		Assay	Sample	Ct	Tm	Efficiency	Flags		Assay
16S rRNA	BAL_CASE01	17.06	81.28	1.87			16S rRNA	BAL_CASE02	21.24	82.08	1.95			16S rRNA	BAL_CASE03	17.22	82.46	1.91			16S rRNA	BAL_CASE04	20.53	82.12	1.83			16S rRNA	BAL_CASE05	16.14	82.42	1.9			16S rRNA	BAL_CASE06	16.43	82.3	1.95			16S rRNA	BAL_CASE07	20.76	82.08	1.93			16S rRNA
aac	BAL_CASE01				NoAmplification		aac	BAL_CASE02				NoAmplification		aac	BAL_CASE03	31.71	86.48	1.57	MultipleMeltPeaks		aac	BAL_CASE04				NoAmplification		aac	BAL_CASE05	30.49	80.85	1.32	MultipleMeltPeaks		aac	BAL_CASE06	33.28	77.38	1.6			aac	BAL_CASE07				NoAmplification		aac
aac(6')-Ib(aka aacA4)-01	BAL_CASE01				NoAmplification		aac(6')-Ib(aka aacA4)-01	BAL_CASE02				NoAmplification		aac(6')-Ib(aka aacA4)-01	BAL_CASE03				NoAmplification		aac(6')-Ib(aka aacA4)-01	BAL_CASE04				NoAmplification		aac(6')-Ib(aka aacA4)-01	BAL_CASE05				NoAmplification		aac(6')-Ib(aka aacA4)-01	BAL_CASE06				NoAmplification		aac(6')-Ib(aka aacA4)-01	BAL_CASE07				NoAmplification		aac(6')-Ib(aka aacA4)-01
aac(6')-Ib(aka aacA4)-02	BAL_CASE01	29.63	86.07	2.01			aac(6')-Ib(aka aacA4)-02	BAL_CASE02				CurveFitFailed		aac(6')-Ib(aka aacA4)-02	BAL_CASE03	33.87	79.09	1.96	MultipleMeltPeaks		aac(6')-Ib(aka aacA4)-02	BAL_CASE04				CurveFitFailed		aac(6')-Ib(aka aacA4)-02	BAL_CASE05	35.33	82.86	1.86	MultipleMeltPeaks		aac(6')-Ib(aka aacA4)-02	BAL_CASE06	31.22	82.88	1.96	MultipleMeltPeaks		aac(6')-Ib(aka aacA4)-02	BAL_CASE07				NoAmplification		aac(6')-Ib(aka aacA4)-02
aac(6')-Ib(aka aacA4)-03	BAL_CASE01				NoAmplification		aac(6')-Ib(aka aacA4)-03	BAL_CASE02				NoAmplification		aac(6')-Ib(aka aacA4)-03	BAL_CASE03				NoAmplification		aac(6')-Ib(aka aacA4)-03	BAL_CASE04				CurveFitFailed		aac(6')-Ib(aka aacA4)-03	BAL_CASE05				BadR2, CtIsSmall, SaturationBaselineRatioIsLow, CurveFitFailed, HighBaseline		aac(6')-Ib(aka aacA4)-03	BAL_CASE06				NoAmplification		aac(6')-Ib(aka aacA4)-03	BAL_CASE07				NoAmplification		aac(6')-Ib(aka aacA4)-03
aac(6')-II	BAL_CASE01				NoAmplification		aac(6')-II	BAL_CASE02	34.41	83.84	1.85			aac(6')-II	BAL_CASE03				NoAmplification		aac(6')-II	BAL_CASE04				NoAmplification		aac(6')-II	BAL_CASE05	36.41	85.21	1.71			aac(6')-II	BAL_CASE06				NoAmplification		aac(6')-II	BAL_CASE07				NoAmplification		aac(6')-II
aac(6')I1	BAL_CASE01				NoAmplification		aac(6')I1	BAL_CASE02				NoAmplification		aac(6')I1	BAL_CASE03				NoAmplification		aac(6')I1	BAL_CASE04				NoAmplification		aac(6')I1	BAL_CASE05				NoAmplification		aac(6')I1	BAL_CASE06				NoAmplification		aac(6')I1	BAL_CASE07				NoAmplification		aac(6')I1
aacA/aphD	BAL_CASE01				NoAmplification		aacA/aphD	BAL_CASE02				NoAmplification		aacA/aphD	BAL_CASE03				NoAmplification		aacA/aphD	BAL_CASE04				NoAmplification		aacA/aphD	BAL_CASE05				NoAmplification		aacA/aphD	BAL_CASE06				NoAmplification		aacA/aphD	BAL_CASE07				NoAmplification		aacA/aphD
aacC	BAL_CASE01	31.41	91.99	1.82			aacC	BAL_CASE02	35.52	87.74	1.84			aacC	BAL_CASE03	29.99	88.6	1.9			aacC	BAL_CASE04				NoAmplification		aacC	BAL_CASE05	30.56	88.62	1.8			aacC	BAL_CASE06	33	77.46	1.84	MultipleMeltPeaks		aacC	BAL_CASE07				CurveFitFailed		aacC
aacC1	BAL_CASE01				NoAmplification		aacC1	BAL_CASE02				NoAmplification		aacC1	BAL_CASE03				NoAmplification		aacC1	BAL_CASE04				NoAmplification		aacC1	BAL_CASE05				NoAmplification		aacC1	BAL_CASE06				NoAmplification		aacC1	BAL_CASE07				NoAmplification		aacC1
aacC2	BAL_CASE01				NoAmplification		aacC2	BAL_CASE02				NoAmplification		aacC2	BAL_CASE03				NoAmplification		aacC2	BAL_CASE04				NoAmplification		aacC2	BAL_CASE05				NoAmplification		aacC2	BAL_CASE06				NoAmplification		aacC2	BAL_CASE07				NoAmplification		aacC2
aacC4	BAL_CASE01				NoAmplification		aacC4	BAL_CASE02				NoAmplification		aacC4	BAL_CASE03				NoAmplification		aacC4	BAL_CASE04	32.68	86.72	1.89			aacC4	BAL_CASE05				NoAmplification		aacC4	BAL_CASE06	35.25	78.4	1.88	MultipleMeltPeaks		aacC4	BAL_CASE07				NoAmplification		aacC4
aadA-01	BAL_CASE01				NoAmplification		aadA-01	BAL_CASE02				NoAmplification		aadA-01	BAL_CASE03				NoAmplification		aadA-01	BAL_CASE04	34.46	87.48	1.86			aadA-01	BAL_CASE05	37.48	86.86	1.78			aadA-01	BAL_CASE06				NoAmplification		aadA-01	BAL_CASE07				NoAmplification		aadA-01
aadA-02	BAL_CASE01				NoAmplification		aadA-02	BAL_CASE02				NoAmplification		aadA-02	BAL_CASE03	40.34	80.83	1.74			aadA-02	BAL_CASE04	32.85	80.44	1.94			aadA-02	BAL_CASE05	35.81	80.63	1.86			aadA-02	BAL_CASE06				NoAmplification		aadA-02	BAL_CASE07				NoAmplification		aadA-02
aadA-1-01	BAL_CASE01				NoAmplification		aadA-1-01	BAL_CASE02				NoAmplification		aadA-1-01	BAL_CASE03	33.96	81.53	1.95			aadA-1-01	BAL_CASE04				NoAmplification		aadA-1-01	BAL_CASE05	32.03	81.64	1.9			aadA-1-01	BAL_CASE06	26.82	79.68	1.91			aadA-1-01	BAL_CASE07				NoAmplification		aadA-1-01
aadA-1-02	BAL_CASE01				NoAmplification		aadA-1-02	BAL_CASE02				NoAmplification		aadA-1-02	BAL_CASE03				NoAmplification		aadA-1-02	BAL_CASE04				NoAmplification		aadA-1-02	BAL_CASE05				NoAmplification		aadA-1-02	BAL_CASE06	26.19	76.47	2.03			aadA-1-02	BAL_CASE07				NoAmplification		aadA-1-02
aadA1	BAL_CASE01	30.18	84.5	2.04			aadA1	BAL_CASE02	37.22	83.5	1.81			aadA1	BAL_CASE03	35.88	77.1	1.94			aadA1	BAL_CASE04	33.12	83.19	2.06			aadA1	BAL_CASE05	32.61	84.06	2.02			aadA1	BAL_CASE06				NoAmplification		aadA1	BAL_CASE07	34.76	75.71	2.02			aadA1
aadA2-01	BAL_CASE01				CurveFitFailed		aadA2-01	BAL_CASE02	38.64	84	1.67	MultipleMeltPeaks		aadA2-01	BAL_CASE03				NoAmplification		aadA2-01	BAL_CASE04				NoAmplification		aadA2-01	BAL_CASE05				NoAmplification		aadA2-01	BAL_CASE06				NoAmplification		aadA2-01	BAL_CASE07				NoAmplification		aadA2-01
aadA2-02	BAL_CASE01				NoAmplification		aadA2-02	BAL_CASE02	32.33	75.39	2			aadA2-02	BAL_CASE03	32.64	75.41	1.95			aadA2-02	BAL_CASE04				NoAmplification		aadA2-02	BAL_CASE05				NoAmplification		aadA2-02	BAL_CASE06	34.49	75.08	2.02			aadA2-02	BAL_CASE07	32.14	75.39	1.87			aadA2-02
aadA2-03	BAL_CASE01				NoAmplification		aadA2-03	BAL_CASE02				NoAmplification		aadA2-03	BAL_CASE03				NoAmplification		aadA2-03	BAL_CASE04				NoAmplification		aadA2-03	BAL_CASE05				NoAmplification		aadA2-03	BAL_CASE06				NoAmplification		aadA2-03	BAL_CASE07				NoAmplification		aadA2-03
aadA5-01	BAL_CASE01	30.75	88.63	1.85			aadA5-01	BAL_CASE02	35.05	81.86	1.89			aadA5-01	BAL_CASE03				CurveFitFailed		aadA5-01	BAL_CASE04	32.69	88.61	1.79			aadA5-01	BAL_CASE05				NoAmplification		aadA5-01	BAL_CASE06				NoAmplification		aadA5-01	BAL_CASE07				NoAmplification		aadA5-01
aadA5-02	BAL_CASE01	30.5	88.59	1.95			aadA5-02	BAL_CASE02	34.99	77.82	1.92			aadA5-02	BAL_CASE03	33.15	77.96	1.98	MultipleMeltPeaks		aadA5-02	BAL_CASE04	31.24	86.5	1.86	MultipleMeltPeaks		aadA5-02	BAL_CASE05	34.16	87.91	1.87			aadA5-02	BAL_CASE06	36.5	81.08	1.82	MultipleMeltPeaks		aadA5-02	BAL_CASE07	36.23	83.83	1.85			aadA5-02
aadA9-01	BAL_CASE01				NoAmplification		aadA9-01	BAL_CASE02				NoAmplification		aadA9-01	BAL_CASE03				NoAmplification		aadA9-01	BAL_CASE04				CurveFitFailed		aadA9-01	BAL_CASE05	34.56	88.69	1.87			aadA9-01	BAL_CASE06				NoAmplification		aadA9-01	BAL_CASE07				NoAmplification		aadA9-01
aadA9-02	BAL_CASE01				NoAmplification		aadA9-02	BAL_CASE02				NoAmplification		aadA9-02	BAL_CASE03				NoAmplification		aadA9-02	BAL_CASE04				NoAmplification		aadA9-02	BAL_CASE05				NoAmplification		aadA9-02	BAL_CASE06				NoAmplification		aadA9-02	BAL_CASE07				NoAmplification		aadA9-02
aadD	BAL_CASE01				NoAmplification		aadD	BAL_CASE02				NoAmplification		aadD	BAL_CASE03				NoAmplification		aadD	BAL_CASE04				NoAmplification		aadD	BAL_CASE05				NoAmplification		aadD	BAL_CASE06				NoAmplification		aadD	BAL_CASE07				NoAmplification		aadD
aadE	BAL_CASE01				NoAmplification		aadE	BAL_CASE02				NoAmplification		aadE	BAL_CASE03				NoAmplification		aadE	BAL_CASE04				NoAmplification		aadE	BAL_CASE05				NoAmplification		aadE	BAL_CASE06				NoAmplification		aadE	BAL_CASE07				NoAmplification		aadE
acrA-01	BAL_CASE01	29.93	88.74	1.89			acrA-01	BAL_CASE02	33.54	88.76	1.86			acrA-01	BAL_CASE03	31.05	88.76	1.89			acrA-01	BAL_CASE04	30.75	88.74	1.93			acrA-01	BAL_CASE05	30.71	88.8	1.94			acrA-01	BAL_CASE06	32.68	88.77	1.91			acrA-01	BAL_CASE07	36.17	82.28	1.85	MultipleMeltPeaks		acrA-01
acrA-02	BAL_CASE01				NoAmplification		acrA-02	BAL_CASE02				NoAmplification		acrA-02	BAL_CASE03				NoAmplification		acrA-02	BAL_CASE04				NoAmplification		acrA-02	BAL_CASE05	33.21	83.52	1.93			acrA-02	BAL_CASE06	34.54	82.59	1.86			acrA-02	BAL_CASE07				NoAmplification		acrA-02
acrA-03	BAL_CASE01				NoAmplification		acrA-03	BAL_CASE02				NoAmplification		acrA-03	BAL_CASE03	36.19	81.99	1.89	MultipleMeltPeaks		acrA-03	BAL_CASE04				NoAmplification		acrA-03	BAL_CASE05				NoAmplification		acrA-03	BAL_CASE06				NoAmplification		acrA-03	BAL_CASE07				NoAmplification		acrA-03
acrA-04	BAL_CASE01	28.73	80.36	1.85	MultipleMeltPeaks		acrA-04	BAL_CASE02	30.51	80.47	1.97			acrA-04	BAL_CASE03	30.84	80.64	1.96	MultipleMeltPeaks		acrA-04	BAL_CASE04	29.08	80.65	1.91			acrA-04	BAL_CASE05	30.99	80.15	1.9	MultipleMeltPeaks		acrA-04	BAL_CASE06	30.02	80.28	1.97	MultipleMeltPeaks		acrA-04	BAL_CASE07	33.61	80.5	1.99			acrA-04
acrA-05	BAL_CASE01	32.13	88.72	1.85			acrA-05	BAL_CASE02	32.38	80.36	1.92			acrA-05	BAL_CASE03	31.91	88.02	1.96			acrA-05	BAL_CASE04	31.07	88.73	1.89			acrA-05	BAL_CASE05	31.14	85.6	1.99			acrA-05	BAL_CASE06	31.65	88.43	1.99	MultipleMeltPeaks		acrA-05	BAL_CASE07	31	80.07	1.95			acrA-05
acrB-01	BAL_CASE01				NoAmplification		acrB-01	BAL_CASE02				NoAmplification		acrB-01	BAL_CASE03	34.61	77.02	2.02			acrB-01	BAL_CASE04				NoAmplification		acrB-01	BAL_CASE05	36.1	87.5	1.84			acrB-01	BAL_CASE06				NoAmplification		acrB-01	BAL_CASE07				NoAmplification		acrB-01
acrF	BAL_CASE01	30.59	85.27	1.87	MultipleMeltPeaks		acrF	BAL_CASE02	35.12	78.82	1.91	MultipleMeltPeaks		acrF	BAL_CASE03	34.15	82.06	1.95	MultipleMeltPeaks		acrF	BAL_CASE04	31.25	81.78	1.85	MultipleMeltPeaks		acrF	BAL_CASE05	29.02	83.18	1.59			acrF	BAL_CASE06	33.22	78.84	1.8	MultipleMeltPeaks		acrF	BAL_CASE07	37.75	82.44	1.83	MultipleMeltPeaks		acrF
acrR-01	BAL_CASE01				NoAmplification		acrR-01	BAL_CASE02				NoAmplification		acrR-01	BAL_CASE03	31.65	87.23	1.94	MultipleMeltPeaks		acrR-01	BAL_CASE04	31.92	78.03	1.83	MultipleMeltPeaks		acrR-01	BAL_CASE05	33.17	85.7	1.93			acrR-01	BAL_CASE06				NoAmplification		acrR-01	BAL_CASE07				NoAmplification		acrR-01
acrR-02	BAL_CASE01				NoAmplification		acrR-02	BAL_CASE02	35.5	83.3	1.85			acrR-02	BAL_CASE03				NoAmplification		acrR-02	BAL_CASE04				NoAmplification		acrR-02	BAL_CASE05				NoAmplification		acrR-02	BAL_CASE06				NoAmplification		acrR-02	BAL_CASE07	34.33	75.54	1.96			acrR-02
Actin	BAL_CASE01	18.75	87.07	1.85			Actin	BAL_CASE02	21.88	87.13	1.93			Actin	BAL_CASE03	21.91	87.19	1.91			Actin	BAL_CASE04	19.2	87.25	1.82			Actin	BAL_CASE05	20.01	87.19	1.87			Actin	BAL_CASE06	20.54	87.29	1.91			Actin	BAL_CASE07	23.13	87.29	1.92	MultipleMeltPeaks		Actin
adeA	BAL_CASE01				NoAmplification		adeA	BAL_CASE02	33.89	84.02	1.87			adeA	BAL_CASE03				NoAmplification		adeA	BAL_CASE04				NoAmplification		adeA	BAL_CASE05	32.49	83.58	1.85			adeA	BAL_CASE06				NoAmplification		adeA	BAL_CASE07	33.8	79.51	1.9			adeA
ampC-01	BAL_CASE01	30.37	88.02	1.99	MultipleMeltPeaks		ampC-01	BAL_CASE02	36.24	82.19	1.81	MultipleMeltPeaks		ampC-01	BAL_CASE03	35.54	84.53	1.84	MultipleMeltPeaks		ampC-01	BAL_CASE04	33.95	79.56	1.97	MultipleMeltPeaks		ampC-01	BAL_CASE05	32.6	85.02	1.98			ampC-01	BAL_CASE06	33.14	85.51	2.03	MultipleMeltPeaks		ampC-01	BAL_CASE07	35.34	84.75	1.88			ampC-01
ampC-02	BAL_CASE01				NoAmplification		ampC-02	BAL_CASE02				NoAmplification		ampC-02	BAL_CASE03	36.05	77.45	2.03			ampC-02	BAL_CASE04				NoAmplification		ampC-02	BAL_CASE05	34.38	83.62	1.94			ampC-02	BAL_CASE06				NoAmplification		ampC-02	BAL_CASE07	37.53	87.28	1.87			ampC-02
ampC-04	BAL_CASE01				NoAmplification		ampC-04	BAL_CASE02	34.42	78.02	1.99			ampC-04	BAL_CASE03	36.32	77.41	2			ampC-04	BAL_CASE04	32.72	78.52	1.77			ampC-04	BAL_CASE05	31.91	78.7	1.7	MultipleMeltPeaks		ampC-04	BAL_CASE06	33.82	78.26	1.93			ampC-04	BAL_CASE07	35.91	77.37	1.8	MultipleMeltPeaks		ampC-04
ampC-05	BAL_CASE01				NoAmplification		ampC-05	BAL_CASE02				NoAmplification		ampC-05	BAL_CASE03				NoAmplification		ampC-05	BAL_CASE04				NoAmplification		ampC-05	BAL_CASE05				NoAmplification		ampC-05	BAL_CASE06				NoAmplification		ampC-05	BAL_CASE07				NoAmplification		ampC-05
ampC-06	BAL_CASE01	32.67	84.22	1.88			ampC-06	BAL_CASE02				NoAmplification		ampC-06	BAL_CASE03				NoAmplification		ampC-06	BAL_CASE04	34.79	84.22	1.93			ampC-06	BAL_CASE05	34.37	78.81	1.93			ampC-06	BAL_CASE06	37.89	79.05	1.82			ampC-06	BAL_CASE07	37.73	80.85	1.79			ampC-06
ampC-07	BAL_CASE01	31.64	88.6	1.86			ampC-07	BAL_CASE02	35.34	88.69	1.83			ampC-07	BAL_CASE03	36.42	82.72	1.77	MultipleMeltPeaks		ampC-07	BAL_CASE04	32.49	88.37	1.88			ampC-07	BAL_CASE05	32.47	84.71	1.89	MultipleMeltPeaks		ampC-07	BAL_CASE06	36.4	88.53	1.76			ampC-07	BAL_CASE07				NoAmplification		ampC-07
ampC-09	BAL_CASE01				NoAmplification		ampC-09	BAL_CASE02				NoAmplification		ampC-09	BAL_CASE03				NoAmplification		ampC-09	BAL_CASE04				NoAmplification		ampC-09	BAL_CASE05				NoAmplification		ampC-09	BAL_CASE06				NoAmplification		ampC-09	BAL_CASE07				NoAmplification		ampC-09
ampC/blaDHA	BAL_CASE01				NoAmplification		ampC/blaDHA	BAL_CASE02				NoAmplification		ampC/blaDHA	BAL_CASE03	33.13	76.15	1.92			ampC/blaDHA	BAL_CASE04				CurveFitFailed		ampC/blaDHA	BAL_CASE05	33.92	77.18	1.92			ampC/blaDHA	BAL_CASE06	33.14	77.01	1.86	MultipleMeltPeaks		ampC/blaDHA	BAL_CASE07	40.7	85.38	1.7	MultipleMeltPeaks		ampC/blaDHA
aph	BAL_CASE01				NoAmplification		aph	BAL_CASE02				NoAmplification		aph	BAL_CASE03				NoAmplification		aph	BAL_CASE04				NoAmplification		aph	BAL_CASE05				NoAmplification		aph	BAL_CASE06				NoAmplification		aph	BAL_CASE07				NoAmplification		aph
aph(2')-Id-01	BAL_CASE01				NoAmplification		aph(2')-Id-01	BAL_CASE02				NoAmplification		aph(2')-Id-01	BAL_CASE03				NoAmplification		aph(2')-Id-01	BAL_CASE04				NoAmplification		aph(2')-Id-01	BAL_CASE05				NoAmplification		aph(2')-Id-01	BAL_CASE06				NoAmplification		aph(2')-Id-01	BAL_CASE07				NoAmplification		aph(2')-Id-01
aph(2')-Id-02	BAL_CASE01				NoAmplification		aph(2')-Id-02	BAL_CASE02				NoAmplification		aph(2')-Id-02	BAL_CASE03				NoAmplification		aph(2')-Id-02	BAL_CASE04				NoAmplification		aph(2')-Id-02	BAL_CASE05				NoAmplification		aph(2')-Id-02	BAL_CASE06				NoAmplification		aph(2')-Id-02	BAL_CASE07				NoAmplification		aph(2')-Id-02
aph6ia	BAL_CASE01				NoAmplification		aph6ia	BAL_CASE02	41.34	78.05	1.73	MultipleMeltPeaks		aph6ia	BAL_CASE03				NoAmplification		aph6ia	BAL_CASE04				CurveFitFailed		aph6ia	BAL_CASE05	34.96	78.99	1.85			aph6ia	BAL_CASE06				NoAmplification		aph6ia	BAL_CASE07	33.32	77.86	1.97	MultipleMeltPeaks		aph6ia
aphA1(aka kanR)	BAL_CASE01				NoAmplification		aphA1(aka kanR)	BAL_CASE02				NoAmplification		aphA1(aka kanR)	BAL_CASE03				NoAmplification		aphA1(aka kanR)	BAL_CASE04				NoAmplification		aphA1(aka kanR)	BAL_CASE05				NoAmplification		aphA1(aka kanR)	BAL_CASE06				NoAmplification		aphA1(aka kanR)	BAL_CASE07				NoAmplification		aphA1(aka kanR)
bacA-01	BAL_CASE01				NoAmplification		bacA-01	BAL_CASE02				NoAmplification		bacA-01	BAL_CASE03				NoAmplification		bacA-01	BAL_CASE04				NoAmplification		bacA-01	BAL_CASE05	35.14	87.45	1.9			bacA-01	BAL_CASE06				CurveFitFailed		bacA-01	BAL_CASE07				NoAmplification		bacA-01
bacA-02	BAL_CASE01				NoAmplification		bacA-02	BAL_CASE02	36.65	83.43	1.73	MultipleMeltPeaks		bacA-02	BAL_CASE03				NoAmplification		bacA-02	BAL_CASE04				NoAmplification		bacA-02	BAL_CASE05	35.21	87.31	1.75			bacA-02	BAL_CASE06				NoAmplification		bacA-02	BAL_CASE07				NoAmplification		bacA-02
BETA-globin	BAL_CASE01	19.26	84.27	1.8			BETA-globin	BAL_CASE02	23.06	84.27	1.93			BETA-globin	BAL_CASE03	22.65	84.29	1.94			BETA-globin	BAL_CASE04	20.08	84.31	1.8			BETA-globin	BAL_CASE05	20.51	84.33	1.88			BETA-globin	BAL_CASE06	20.93	84.35	1.93			BETA-globin	BAL_CASE07	22.86	84.35	1.93			BETA-globin
bla-ACC-1	BAL_CASE01	32.05	86.16	1.89			bla-ACC-1	BAL_CASE02				NoAmplification		bla-ACC-1	BAL_CASE03	35.07	86.17	1.85	MultipleMeltPeaks		bla-ACC-1	BAL_CASE04	34.83	85.56	1.88			bla-ACC-1	BAL_CASE05	34.58	86.27	1.87			bla-ACC-1	BAL_CASE06				NoAmplification		bla-ACC-1	BAL_CASE07				NoAmplification		bla-ACC-1
bla-L1	BAL_CASE01				NoAmplification		bla-L1	BAL_CASE02	34.35	83.67	1.94	MultipleMeltPeaks		bla-L1	BAL_CASE03	31.82	83.15	1.91			bla-L1	BAL_CASE04				NoAmplification		bla-L1	BAL_CASE05	35.62	84.33	1.91			bla-L1	BAL_CASE06	32.55	82.29	1.83	MultipleMeltPeaks		bla-L1	BAL_CASE07				CurveFitFailed		bla-L1
bla1	BAL_CASE01				NoAmplification		bla1	BAL_CASE02				NoAmplification		bla1	BAL_CASE03				NoAmplification		bla1	BAL_CASE04				NoAmplification		bla1	BAL_CASE05				NoAmplification		bla1	BAL_CASE06				NoAmplification		bla1	BAL_CASE07				NoAmplification		bla1
blaCMY	BAL_CASE01				NoAmplification		blaCMY	BAL_CASE02				NoAmplification		blaCMY	BAL_CASE03				NoAmplification		blaCMY	BAL_CASE04				NoAmplification		blaCMY	BAL_CASE05				CurveFitFailed		blaCMY	BAL_CASE06	37.05	77.87	1.86			blaCMY	BAL_CASE07				NoAmplification		blaCMY
blaCMY2-01	BAL_CASE01				NoAmplification		blaCMY2-01	BAL_CASE02				NoAmplification		blaCMY2-01	BAL_CASE03				CurveFitFailed		blaCMY2-01	BAL_CASE04				NoAmplification		blaCMY2-01	BAL_CASE05				NoAmplification		blaCMY2-01	BAL_CASE06				NoAmplification		blaCMY2-01	BAL_CASE07	35.78	75.12	1.96			blaCMY2-01
blaCMY2-02	BAL_CASE01	27	84.8	1.93	MultipleMeltPeaks		blaCMY2-02	BAL_CASE02	32.44	83.37	1.94			blaCMY2-02	BAL_CASE03	30.94	89.56	1.97			blaCMY2-02	BAL_CASE04	28.72	88.26	1.83	MultipleMeltPeaks		blaCMY2-02	BAL_CASE05	29.78	85.44	1.94			blaCMY2-02	BAL_CASE06	30.36	82.45	1.93	MultipleMeltPeaks		blaCMY2-02	BAL_CASE07	31.08	83.39	1.98			blaCMY2-02
blaCTX-M-01	BAL_CASE01				NoAmplification		blaCTX-M-01	BAL_CASE02				NoAmplification		blaCTX-M-01	BAL_CASE03	35.21	83.16	1.84			blaCTX-M-01	BAL_CASE04				CurveFitFailed		blaCTX-M-01	BAL_CASE05				BadR2, CtIsSmall, SaturationBaselineRatioIsLow, CurveFitFailed, HighBaseline		blaCTX-M-01	BAL_CASE06				NoAmplification		blaCTX-M-01	BAL_CASE07				NoAmplification		blaCTX-M-01
blaCTX-M-02	BAL_CASE01				NoAmplification		blaCTX-M-02	BAL_CASE02				NoAmplification		blaCTX-M-02	BAL_CASE03	41.64	79.26	1.61	MultipleMeltPeaks		blaCTX-M-02	BAL_CASE04				NoAmplification		blaCTX-M-02	BAL_CASE05	35.06	79.87	1.9	MultipleMeltPeaks		blaCTX-M-02	BAL_CASE06				CurveFitFailed		blaCTX-M-02	BAL_CASE07				NoAmplification		blaCTX-M-02
blaCTX-M-03	BAL_CASE01				NoAmplification		blaCTX-M-03	BAL_CASE02				CurveFitFailed		blaCTX-M-03	BAL_CASE03				NoAmplification		blaCTX-M-03	BAL_CASE04				NoAmplification		blaCTX-M-03	BAL_CASE05				NoAmplification		blaCTX-M-03	BAL_CASE06				NoAmplification		blaCTX-M-03	BAL_CASE07				NoAmplification		blaCTX-M-03
blaCTX-M-04	BAL_CASE01	32.36	92.44	2.01	MultipleMeltPeaks		blaCTX-M-04	BAL_CASE02				NoAmplification		blaCTX-M-04	BAL_CASE03	36.18	80.23	1.84			blaCTX-M-04	BAL_CASE04				NoAmplification		blaCTX-M-04	BAL_CASE05	35.01	86.8	1.85			blaCTX-M-04	BAL_CASE06	37.17	87.2	1.77			blaCTX-M-04	BAL_CASE07				NoAmplification		blaCTX-M-04
blaCTX-M-05	BAL_CASE01				NoAmplification		blaCTX-M-05	BAL_CASE02	36.16	75.48	1.73			blaCTX-M-05	BAL_CASE03	33	76.76	1.79			blaCTX-M-05	BAL_CASE04	32.25	76.2	1.8			blaCTX-M-05	BAL_CASE05	32.14	77	1.8			blaCTX-M-05	BAL_CASE06	33.87	76.55	1.76			blaCTX-M-05	BAL_CASE07	31.48	76.51	1.88			blaCTX-M-05
blaCTX-M-06	BAL_CASE01				NoAmplification		blaCTX-M-06	BAL_CASE02				NoAmplification		blaCTX-M-06	BAL_CASE03				NoAmplification		blaCTX-M-06	BAL_CASE04				NoAmplification		blaCTX-M-06	BAL_CASE05				NoAmplification		blaCTX-M-06	BAL_CASE06				NoAmplification		blaCTX-M-06	BAL_CASE07				NoAmplification		blaCTX-M-06
blaGES	BAL_CASE01				NoAmplification		blaGES	BAL_CASE02				NoAmplification		blaGES	BAL_CASE03				NoAmplification		blaGES	BAL_CASE04				NoAmplification		blaGES	BAL_CASE05				NoAmplification		blaGES	BAL_CASE06				NoAmplification		blaGES	BAL_CASE07				NoAmplification		blaGES
blaIMP-01	BAL_CASE01				NoAmplification		blaIMP-01	BAL_CASE02				NoAmplification		blaIMP-01	BAL_CASE03				NoAmplification		blaIMP-01	BAL_CASE04				NoAmplification		blaIMP-01	BAL_CASE05				NoAmplification		blaIMP-01	BAL_CASE06				NoAmplification		blaIMP-01	BAL_CASE07				NoAmplification		blaIMP-01
blaIMP-02	BAL_CASE01				NoAmplification		blaIMP-02	BAL_CASE02	36.36	74.89	1.9			blaIMP-02	BAL_CASE03				NoAmplification		blaIMP-02	BAL_CASE04				NoAmplification		blaIMP-02	BAL_CASE05				NoAmplification		blaIMP-02	BAL_CASE06				NoAmplification		blaIMP-02	BAL_CASE07				NoAmplification		blaIMP-02
blaMOX/blaCMY	BAL_CASE01				NoAmplification		blaMOX/blaCMY	BAL_CASE02				NoAmplification		blaMOX/blaCMY	BAL_CASE03				NoAmplification		blaMOX/blaCMY	BAL_CASE04				NoAmplification		blaMOX/blaCMY	BAL_CASE05				NoAmplification		blaMOX/blaCMY	BAL_CASE06				NoAmplification		blaMOX/blaCMY	BAL_CASE07				NoAmplification		blaMOX/blaCMY
blaOCH	BAL_CASE01				NoAmplification		blaOCH	BAL_CASE02				NoAmplification		blaOCH	BAL_CASE03				NoAmplification		blaOCH	BAL_CASE04				NoAmplification		blaOCH	BAL_CASE05				NoAmplification		blaOCH	BAL_CASE06				NoAmplification		blaOCH	BAL_CASE07				NoAmplification		blaOCH
blaOKP	BAL_CASE01				NoAmplification		blaOKP	BAL_CASE02				NoAmplification		blaOKP	BAL_CASE03				NoAmplification		blaOKP	BAL_CASE04				NoAmplification		blaOKP	BAL_CASE05				NoAmplification		blaOKP	BAL_CASE06				NoAmplification		blaOKP	BAL_CASE07				NoAmplification		blaOKP
blaOXA1/blaOXA30	BAL_CASE01				NoAmplification		blaOXA1/blaOXA30	BAL_CASE02				NoAmplification		blaOXA1/blaOXA30	BAL_CASE03				NoAmplification		blaOXA1/blaOXA30	BAL_CASE04				NoAmplification		blaOXA1/blaOXA30	BAL_CASE05				NoAmplification		blaOXA1/blaOXA30	BAL_CASE06				NoAmplification		blaOXA1/blaOXA30	BAL_CASE07				NoAmplification		blaOXA1/blaOXA30
blaOXA10-01	BAL_CASE01				NoAmplification		blaOXA10-01	BAL_CASE02				NoAmplification		blaOXA10-01	BAL_CASE03				NoAmplification		blaOXA10-01	BAL_CASE04				NoAmplification		blaOXA10-01	BAL_CASE05				NoAmplification		blaOXA10-01	BAL_CASE06				NoAmplification		blaOXA10-01	BAL_CASE07				NoAmplification		blaOXA10-01
blaOXA10-02	BAL_CASE01				NoAmplification		blaOXA10-02	BAL_CASE02				NoAmplification		blaOXA10-02	BAL_CASE03				NoAmplification		blaOXA10-02	BAL_CASE04				NoAmplification		blaOXA10-02	BAL_CASE05				NoAmplification		blaOXA10-02	BAL_CASE06				NoAmplification		blaOXA10-02	BAL_CASE07				NoAmplification		blaOXA10-02
blaOXY	BAL_CASE01				NoAmplification		blaOXY	BAL_CASE02	39.55	87.37	1.68	MultipleMeltPeaks		blaOXY	BAL_CASE03				NoAmplification		blaOXY	BAL_CASE04				NoAmplification		blaOXY	BAL_CASE05				NoAmplification		blaOXY	BAL_CASE06				NoAmplification		blaOXY	BAL_CASE07				NoAmplification		blaOXY
blaPAO	BAL_CASE01				NoAmplification		blaPAO	BAL_CASE02				NoAmplification		blaPAO	BAL_CASE03				NoAmplification		blaPAO	BAL_CASE04				NoAmplification		blaPAO	BAL_CASE05				NoAmplification		blaPAO	BAL_CASE06				NoAmplification		blaPAO	BAL_CASE07				NoAmplification		blaPAO
blaPER	BAL_CASE01				NoAmplification		blaPER	BAL_CASE02				NoAmplification		blaPER	BAL_CASE03	37.82	85.39	1.81	MultipleMeltPeaks		blaPER	BAL_CASE04				NoAmplification		blaPER	BAL_CASE05				NoAmplification		blaPER	BAL_CASE06				BadR2, LowEfficiency, CtIsSmall, SaturationBaselineRatioIsLow, CurveFitFailed, HighBaseline		blaPER	BAL_CASE07				NoAmplification		blaPER
blaPSE	BAL_CASE01				NoAmplification		blaPSE	BAL_CASE02				NoAmplification		blaPSE	BAL_CASE03				NoAmplification		blaPSE	BAL_CASE04				NoAmplification		blaPSE	BAL_CASE05				NoAmplification		blaPSE	BAL_CASE06				NoAmplification		blaPSE	BAL_CASE07				NoAmplification		blaPSE
blaROB	BAL_CASE01				NoAmplification		blaROB	BAL_CASE02				NoAmplification		blaROB	BAL_CASE03				NoAmplification		blaROB	BAL_CASE04	30.33	80.93	1.79			blaROB	BAL_CASE05				NoAmplification		blaROB	BAL_CASE06				NoAmplification		blaROB	BAL_CASE07				NoAmplification		blaROB
blaSFO	BAL_CASE01	30.26	89.94	1.95			blaSFO	BAL_CASE02	34.17	87.71	1.91			blaSFO	BAL_CASE03	35.81	87.25	1.9			blaSFO	BAL_CASE04				CurveFitFailed		blaSFO	BAL_CASE05	31.76	84.19	1.96	MultipleMeltPeaks		blaSFO	BAL_CASE06	32.38	80.13	1.88	MultipleMeltPeaks		blaSFO	BAL_CASE07	34.8	84.61	1.89	MultipleMeltPeaks		blaSFO
blaSHV-01	BAL_CASE01				NoAmplification		blaSHV-01	BAL_CASE02				CurveFitFailed		blaSHV-01	BAL_CASE03				NoAmplification		blaSHV-01	BAL_CASE04				NoAmplification		blaSHV-01	BAL_CASE05				NoAmplification		blaSHV-01	BAL_CASE06				NoAmplification		blaSHV-01	BAL_CASE07				NoAmplification		blaSHV-01
blaSHV-02	BAL_CASE01				NoAmplification		blaSHV-02	BAL_CASE02				NoAmplification		blaSHV-02	BAL_CASE03				NoAmplification		blaSHV-02	BAL_CASE04				NoAmplification		blaSHV-02	BAL_CASE05				NoAmplification		blaSHV-02	BAL_CASE06				NoAmplification		blaSHV-02	BAL_CASE07				NoAmplification		blaSHV-02
blaTEM	BAL_CASE01				NoAmplification		blaTEM	BAL_CASE02				NoAmplification		blaTEM	BAL_CASE03	35.59	74.87	2.01			blaTEM	BAL_CASE04	24.29	79.55	1.82			blaTEM	BAL_CASE05				NoAmplification		blaTEM	BAL_CASE06	34.5	75.11	1.99			blaTEM	BAL_CASE07	28.8	79.23	1.97			blaTEM
blaTLA	BAL_CASE01				NoAmplification		blaTLA	BAL_CASE02				NoAmplification		blaTLA	BAL_CASE03				NoAmplification		blaTLA	BAL_CASE04				NoAmplification		blaTLA	BAL_CASE05				NoAmplification		blaTLA	BAL_CASE06				NoAmplification		blaTLA	BAL_CASE07				NoAmplification		blaTLA
blaVEB	BAL_CASE01				NoAmplification		blaVEB	BAL_CASE02				NoAmplification		blaVEB	BAL_CASE03				NoAmplification		blaVEB	BAL_CASE04				NoAmplification		blaVEB	BAL_CASE05				NoAmplification		blaVEB	BAL_CASE06				NoAmplification		blaVEB	BAL_CASE07				NoAmplification		blaVEB
blaVIM	BAL_CASE01				NoAmplification		blaVIM	BAL_CASE02				NoAmplification		blaVIM	BAL_CASE03				NoAmplification		blaVIM	BAL_CASE04				NoAmplification		blaVIM	BAL_CASE05				NoAmplification		blaVIM	BAL_CASE06				NoAmplification		blaVIM	BAL_CASE07				NoAmplification		blaVIM
blaZ	BAL_CASE01				NoAmplification		blaZ	BAL_CASE02				NoAmplification		blaZ	BAL_CASE03				NoAmplification		blaZ	BAL_CASE04				NoAmplification		blaZ	BAL_CASE05				NoAmplification		blaZ	BAL_CASE06				NoAmplification		blaZ	BAL_CASE07				NoAmplification		blaZ
carB	BAL_CASE01				NoAmplification		carB	BAL_CASE02				NoAmplification		carB	BAL_CASE03				NoAmplification		carB	BAL_CASE04				NoAmplification		carB	BAL_CASE05				NoAmplification		carB	BAL_CASE06				NoAmplification		carB	BAL_CASE07				NoAmplification		carB
catA1	BAL_CASE01				NoAmplification		catA1	BAL_CASE02				NoAmplification		catA1	BAL_CASE03				NoAmplification		catA1	BAL_CASE04				NoAmplification		catA1	BAL_CASE05				NoAmplification		catA1	BAL_CASE06				NoAmplification		catA1	BAL_CASE07				NoAmplification		catA1
catB3	BAL_CASE01				NoAmplification		catB3	BAL_CASE02				NoAmplification		catB3	BAL_CASE03				NoAmplification		catB3	BAL_CASE04				NoAmplification		catB3	BAL_CASE05				NoAmplification		catB3	BAL_CASE06				NoAmplification		catB3	BAL_CASE07				NoAmplification		catB3
catB8	BAL_CASE01	29.32	84.59	2	MultipleMeltPeaks		catB8	BAL_CASE02	29.83	82.74	1.94			catB8	BAL_CASE03	28.45	81.52	1.98	MultipleMeltPeaks		catB8	BAL_CASE04	30.11	81.24	1.94			catB8	BAL_CASE05	30.09	82.92	1.96			catB8	BAL_CASE06	28.2	81.96	1.97			catB8	BAL_CASE07	35.11	81.19	1.87			catB8
ceoA	BAL_CASE01	28.99	82.12	1.92	MultipleMeltPeaks		ceoA	BAL_CASE02	30.86	82.51	1.94			ceoA	BAL_CASE03	29.12	82.52	1.95			ceoA	BAL_CASE04	29.1	82.39	1.93	MultipleMeltPeaks		ceoA	BAL_CASE05	32.18	82.64	1.98			ceoA	BAL_CASE06	30.91	82.41	1.99			ceoA	BAL_CASE07	35.07	82.68	1.88			ceoA
cepA	BAL_CASE01				NoAmplification		cepA	BAL_CASE02				NoAmplification		cepA	BAL_CASE03				NoAmplification		cepA	BAL_CASE04				NoAmplification		cepA	BAL_CASE05				NoAmplification		cepA	BAL_CASE06	36.79	82.35	1.89			cepA	BAL_CASE07				NoAmplification		cepA
cfiA	BAL_CASE01				NoAmplification		cfiA	BAL_CASE02				NoAmplification		cfiA	BAL_CASE03				NoAmplification		cfiA	BAL_CASE04	32.62	84.68	1.71			cfiA	BAL_CASE05				NoAmplification		cfiA	BAL_CASE06				NoAmplification		cfiA	BAL_CASE07				NoAmplification		cfiA
cfr	BAL_CASE01				NoAmplification		cfr	BAL_CASE02				NoAmplification		cfr	BAL_CASE03				NoAmplification		cfr	BAL_CASE04				NoAmplification		cfr	BAL_CASE05				NoAmplification		cfr	BAL_CASE06				NoAmplification		cfr	BAL_CASE07				NoAmplification		cfr
cfxA	BAL_CASE01	22.39	77.46	1.82			cfxA	BAL_CASE02	22.6	77.45	1.82			cfxA	BAL_CASE03	19.4	77.62	1.89			cfxA	BAL_CASE04	21.55	77.46	1.7			cfxA	BAL_CASE05	19.74	77.65	1.82			cfxA	BAL_CASE06	17.11	77.66	1.86			cfxA	BAL_CASE07	20.11	77.59	1.76			cfxA
cmeA	BAL_CASE01				NoAmplification		cmeA	BAL_CASE02	35.57	81.86	1.78			cmeA	BAL_CASE03				NoAmplification		cmeA	BAL_CASE04				NoAmplification		cmeA	BAL_CASE05				NoAmplification		cmeA	BAL_CASE06				NoAmplification		cmeA	BAL_CASE07				NoAmplification		cmeA
cmlA1-01	BAL_CASE01				NoAmplification		cmlA1-01	BAL_CASE02				NoAmplification		cmlA1-01	BAL_CASE03				NoAmplification		cmlA1-01	BAL_CASE04				NoAmplification		cmlA1-01	BAL_CASE05				NoAmplification		cmlA1-01	BAL_CASE06				NoAmplification		cmlA1-01	BAL_CASE07				NoAmplification		cmlA1-01
cmlA1-02	BAL_CASE01				NoAmplification		cmlA1-02	BAL_CASE02				NoAmplification		cmlA1-02	BAL_CASE03				NoAmplification		cmlA1-02	BAL_CASE04				NoAmplification		cmlA1-02	BAL_CASE05				NoAmplification		cmlA1-02	BAL_CASE06	33.63	87.66	1.95			cmlA1-02	BAL_CASE07				NoAmplification		cmlA1-02
cmr	BAL_CASE01				NoAmplification		cmr	BAL_CASE02				NoAmplification		cmr	BAL_CASE03				NoAmplification		cmr	BAL_CASE04	32.27	81.06	1.86			cmr	BAL_CASE05				NoAmplification		cmr	BAL_CASE06				NoAmplification		cmr	BAL_CASE07				NoAmplification		cmr
cmx(A)	BAL_CASE01	27.82	86.7	1.98			cmx(A)	BAL_CASE02	30.67	84.75	1.95			cmx(A)	BAL_CASE03	29.21	84.89	1.95	MultipleMeltPeaks		cmx(A)	BAL_CASE04	28.91	84.88	1.7	MultipleMeltPeaks		cmx(A)	BAL_CASE05	28.98	87.01	1.91			cmx(A)	BAL_CASE06	27.11	89.95	1.96	MultipleMeltPeaks		cmx(A)	BAL_CASE07	32.43	86.98	1.95	MultipleMeltPeaks		cmx(A)
cphA-01	BAL_CASE01	29.49	85.95	1.96	MultipleMeltPeaks		cphA-01	BAL_CASE02	36.02	85.59	1.84	MultipleMeltPeaks		cphA-01	BAL_CASE03	33.07	85.64	1.95			cphA-01	BAL_CASE04	31.69	85.35	1.95	MultipleMeltPeaks		cphA-01	BAL_CASE05	29.62	85.51	1.93			cphA-01	BAL_CASE06	32.42	81.01	1.95	MultipleMeltPeaks		cphA-01	BAL_CASE07	34.3	85.69	1.95			cphA-01
cphA-02	BAL_CASE01	32.51	82.33	1.91			cphA-02	BAL_CASE02	29.2	77.63	1.97	MultipleMeltPeaks		cphA-02	BAL_CASE03	31.02	78.65	1.96	MultipleMeltPeaks		cphA-02	BAL_CASE04				NoAmplification		cphA-02	BAL_CASE05	37	76.81	1.84	MultipleMeltPeaks		cphA-02	BAL_CASE06	36.12	82.43	1.85			cphA-02	BAL_CASE07				NoAmplification		cphA-02
dfrA1	BAL_CASE01				NoAmplification		dfrA1	BAL_CASE02				NoAmplification		dfrA1	BAL_CASE03				NoAmplification		dfrA1	BAL_CASE04				NoAmplification		dfrA1	BAL_CASE05				NoAmplification		dfrA1	BAL_CASE06				NoAmplification		dfrA1	BAL_CASE07				NoAmplification		dfrA1
dfrA12	BAL_CASE01				NoAmplification		dfrA12	BAL_CASE02				NoAmplification		dfrA12	BAL_CASE03				NoAmplification		dfrA12	BAL_CASE04				NoAmplification		dfrA12	BAL_CASE05				NoAmplification		dfrA12	BAL_CASE06				NoAmplification		dfrA12	BAL_CASE07				NoAmplification		dfrA12
emrD	BAL_CASE01				NoAmplification		emrD	BAL_CASE02				NoAmplification		emrD	BAL_CASE03				NoAmplification		emrD	BAL_CASE04				NoAmplification		emrD	BAL_CASE05				NoAmplification		emrD	BAL_CASE06				NoAmplification		emrD	BAL_CASE07				NoAmplification		emrD
ereA	BAL_CASE01				NoAmplification		ereA	BAL_CASE02	36.84	82.47	1.84			ereA	BAL_CASE03	38.32	82.71	1.76			ereA	BAL_CASE04	31.67	82.44	1.93			ereA	BAL_CASE05	33.85	82.49	1.93			ereA	BAL_CASE06	37.57	83.11	1.81			ereA	BAL_CASE07				NoAmplification		ereA
ereB	BAL_CASE01	34.09	85.84	2.03			ereB	BAL_CASE02	37.81	85.91	1.76	MultipleMeltPeaks		ereB	BAL_CASE03	34.78	85.93	1.93	MultipleMeltPeaks		ereB	BAL_CASE04	34.69	85.81	2.01	MultipleMeltPeaks		ereB	BAL_CASE05	34.27	78.34	1.93	MultipleMeltPeaks		ereB	BAL_CASE06	36.16	89.24	1.81	MultipleMeltPeaks		ereB	BAL_CASE07	32.84	80.39	2.05			ereB
erm(34)	BAL_CASE01				NoAmplification		erm(34)	BAL_CASE02				NoAmplification		erm(34)	BAL_CASE03				NoAmplification		erm(34)	BAL_CASE04				NoAmplification		erm(34)	BAL_CASE05				NoAmplification		erm(34)	BAL_CASE06				NoAmplification		erm(34)	BAL_CASE07				NoAmplification		erm(34)
erm(35)	BAL_CASE01				NoAmplification		erm(35)	BAL_CASE02				NoAmplification		erm(35)	BAL_CASE03				NoAmplification		erm(35)	BAL_CASE04				NoAmplification		erm(35)	BAL_CASE05				NoAmplification		erm(35)	BAL_CASE06				NoAmplification		erm(35)	BAL_CASE07				NoAmplification		erm(35)
erm(36)	BAL_CASE01				NoAmplification		erm(36)	BAL_CASE02	37.83	86.32	1.74			erm(36)	BAL_CASE03	36.35	82.22	1.84			erm(36)	BAL_CASE04				NoAmplification		erm(36)	BAL_CASE05	32.17	87.86	2.22			erm(36)	BAL_CASE06	34.06	86.19	2.05			erm(36)	BAL_CASE07				NoAmplification		erm(36)
ermA	BAL_CASE01				NoAmplification		ermA	BAL_CASE02				NoAmplification		ermA	BAL_CASE03				NoAmplification		ermA	BAL_CASE04				NoAmplification		ermA	BAL_CASE05				NoAmplification		ermA	BAL_CASE06				NoAmplification		ermA	BAL_CASE07				NoAmplification		ermA
ermA/ermTR	BAL_CASE01				NoAmplification		ermA/ermTR	BAL_CASE02				NoAmplification		ermA/ermTR	BAL_CASE03				NoAmplification		ermA/ermTR	BAL_CASE04				NoAmplification		ermA/ermTR	BAL_CASE05				NoAmplification		ermA/ermTR	BAL_CASE06				NoAmplification		ermA/ermTR	BAL_CASE07				NoAmplification		ermA/ermTR
ermB	BAL_CASE01				NoAmplification		ermB	BAL_CASE02				NoAmplification		ermB	BAL_CASE03	25.23	75.11	2.06			ermB	BAL_CASE04	28.07	74.94	1.99			ermB	BAL_CASE05	27.92	75.09	2.03			ermB	BAL_CASE06	25.15	75.04	2.1			ermB	BAL_CASE07				NoAmplification		ermB
ermC	BAL_CASE01				NoAmplification		ermC	BAL_CASE02				NoAmplification		ermC	BAL_CASE03				CurveFitFailed		ermC	BAL_CASE04	32.38	74.98	1.8	MultipleMeltPeaks		ermC	BAL_CASE05				NoAmplification		ermC	BAL_CASE06				NoAmplification		ermC	BAL_CASE07				NoAmplification		ermC
ermF	BAL_CASE01				NoAmplification		ermF	BAL_CASE02				NoAmplification		ermF	BAL_CASE03	19.36	74.9	2.01			ermF	BAL_CASE04	29.98	74.35	1.98			ermF	BAL_CASE05	19.42	74.81	1.96			ermF	BAL_CASE06	23.15	74.72	2			ermF	BAL_CASE07				NoAmplification		ermF
ermJ/ermD	BAL_CASE01				NoAmplification		ermJ/ermD	BAL_CASE02				NoAmplification		ermJ/ermD	BAL_CASE03				NoAmplification		ermJ/ermD	BAL_CASE04				NoAmplification		ermJ/ermD	BAL_CASE05				NoAmplification		ermJ/ermD	BAL_CASE06				NoAmplification		ermJ/ermD	BAL_CASE07				NoAmplification		ermJ/ermD
ermK-01	BAL_CASE01	32.58	75.07	1.96			ermK-01	BAL_CASE02				NoAmplification		ermK-01	BAL_CASE03	35.36	74.28	1.97			ermK-01	BAL_CASE04				NoAmplification		ermK-01	BAL_CASE05				NoAmplification		ermK-01	BAL_CASE06	33.55	78.71	1.98			ermK-01	BAL_CASE07				NoAmplification		ermK-01
ermK-02	BAL_CASE01	31.89	86.45	1.78			ermK-02	BAL_CASE02				NoAmplification		ermK-02	BAL_CASE03	39.34	80.81	1.67			ermK-02	BAL_CASE04				NoAmplification		ermK-02	BAL_CASE05	36.53	85.65	1.75	MultipleMeltPeaks		ermK-02	BAL_CASE06	39.19	85.84	1.54	MultipleMeltPeaks		ermK-02	BAL_CASE07				NoAmplification		ermK-02
ermT-01	BAL_CASE01				NoAmplification		ermT-01	BAL_CASE02				NoAmplification		ermT-01	BAL_CASE03				NoAmplification		ermT-01	BAL_CASE04				NoAmplification		ermT-01	BAL_CASE05				NoAmplification		ermT-01	BAL_CASE06				NoAmplification		ermT-01	BAL_CASE07				NoAmplification		ermT-01
ermT-02	BAL_CASE01				NoAmplification		ermT-02	BAL_CASE02				NoAmplification		ermT-02	BAL_CASE03				NoAmplification		ermT-02	BAL_CASE04				NoAmplification		ermT-02	BAL_CASE05				NoAmplification		ermT-02	BAL_CASE06				CurveFitFailed		ermT-02	BAL_CASE07				NoAmplification		ermT-02
ermX	BAL_CASE01	28.22	83.6	1.73			ermX	BAL_CASE02				NoAmplification		ermX	BAL_CASE03	24.5	83.85	1.88			ermX	BAL_CASE04				NoAmplification		ermX	BAL_CASE05	35.52	88.76	1.81			ermX	BAL_CASE06	25.35	83.84	1.84			ermX	BAL_CASE07				NoAmplification		ermX
ermY	BAL_CASE01				NoAmplification		ermY	BAL_CASE02				NoAmplification		ermY	BAL_CASE03				NoAmplification		ermY	BAL_CASE04				NoAmplification		ermY	BAL_CASE05				NoAmplification		ermY	BAL_CASE06				NoAmplification		ermY	BAL_CASE07				NoAmplification		ermY
fabK	BAL_CASE01	22.87	77.39	2.08			fabK	BAL_CASE02	27.82	79.12	2.07			fabK	BAL_CASE03	27.09	79.12	2.03			fabK	BAL_CASE04	30.03	79.28	2.11			fabK	BAL_CASE05	28.41	79.85	1.94			fabK	BAL_CASE06	28.44	79.54	1.94			fabK	BAL_CASE07	30.31	79.49	2.04			fabK
floR	BAL_CASE01				NoAmplification		floR	BAL_CASE02				NoAmplification		floR	BAL_CASE03	38.03	83.77	1.82	MultipleMeltPeaks		floR	BAL_CASE04				NoAmplification		floR	BAL_CASE05				NoAmplification		floR	BAL_CASE06				NoAmplification		floR	BAL_CASE07				NoAmplification		floR
folA	BAL_CASE01				NoAmplification		folA	BAL_CASE02				NoAmplification		folA	BAL_CASE03				NoAmplification		folA	BAL_CASE04				NoAmplification		folA	BAL_CASE05				NoAmplification		folA	BAL_CASE06				NoAmplification		folA	BAL_CASE07				NoAmplification		folA
fosB	BAL_CASE01				NoAmplification		fosB	BAL_CASE02				LowEfficiency, CtIsSmall, SaturationBaselineRatioIsLow, CurveFitFailed		fosB	BAL_CASE03				LowEfficiency, CtIsSmall, SaturationBaselineRatioIsLow, CurveFitFailed		fosB	BAL_CASE04				NoAmplification		fosB	BAL_CASE05				LowEfficiency, CtIsSmall, SaturationBaselineRatioIsLow, CurveFitFailed		fosB	BAL_CASE06				LowEfficiency, CtIsSmall, SaturationBaselineRatioIsLow, CurveFitFailed		fosB	BAL_CASE07				LowEfficiency, CtIsSmall, SaturationBaselineRatioIsLow, CurveFitFailed		fosB
fosX	BAL_CASE01				NoAmplification		fosX	BAL_CASE02				NoAmplification		fosX	BAL_CASE03				NoAmplification		fosX	BAL_CASE04				NoAmplification		fosX	BAL_CASE05				NoAmplification		fosX	BAL_CASE06				NoAmplification		fosX	BAL_CASE07				NoAmplification		fosX
fox5	BAL_CASE01	26.85	86.46	1.72			fox5	BAL_CASE02	32.77	86.09	1.84			fox5	BAL_CASE03	28.39	87.61	1.92			fox5	BAL_CASE04	27.06	86.42	1.85			fox5	BAL_CASE05	28.45	86.31	1.79			fox5	BAL_CASE06	28.96	86.28	1.94			fox5	BAL_CASE07	30.08	86.24	1.84			fox5
imiR	BAL_CASE01				NoAmplification		imiR	BAL_CASE02				NoAmplification		imiR	BAL_CASE03				NoAmplification		imiR	BAL_CASE04				NoAmplification		imiR	BAL_CASE05				NoAmplification		imiR	BAL_CASE06				NoAmplification		imiR	BAL_CASE07				NoAmplification		imiR
ImrA-01	BAL_CASE01				NoAmplification		ImrA-01	BAL_CASE02				NoAmplification		ImrA-01	BAL_CASE03				NoAmplification		ImrA-01	BAL_CASE04	34.09	87.24	1.97			ImrA-01	BAL_CASE05	36.58	91.19	1.74			ImrA-01	BAL_CASE06	40.02	80.81	1.75			ImrA-01	BAL_CASE07				NoAmplification		ImrA-01
intI	BAL_CASE01	29.76	84.96	1.93			intI	BAL_CASE02	33.05	84.76	1.92			intI	BAL_CASE03	32.04	84.84	1.92			intI	BAL_CASE04	31.55	84.89	1.87	MultipleMeltPeaks		intI	BAL_CASE05	32.18	85.18	1.75			intI	BAL_CASE06	34.68	85.04	1.91			intI	BAL_CASE07	34.37	84.71	1.9			intI
intI1	BAL_CASE01	19.05	87.82	1.87			intI1	BAL_CASE02	21.88	87.47	1.99			intI1	BAL_CASE03	21.92	87.43	1.97			intI1	BAL_CASE04	20.27	87.57	1.88			intI1	BAL_CASE05	21.06	87.63	1.9			intI1	BAL_CASE06	21.43	87.28	1.99			intI1	BAL_CASE07	22.82	87.17	1.97	MultipleMeltPeaks		intI1
IS613	BAL_CASE01	24.69	79.45	1.58			IS613	BAL_CASE02	24.34	79.6	1.75			IS613	BAL_CASE03	18.34	80.12	1.73			IS613	BAL_CASE04	26.89	79.3	1.59			IS613	BAL_CASE05	25	79.62	1.61			IS613	BAL_CASE06	24.76	80.42	1.78			IS613	BAL_CASE07	23.23	79.66	1.73			IS613
lnuA-01	BAL_CASE01				NoAmplification		lnuA-01	BAL_CASE02				NoAmplification		lnuA-01	BAL_CASE03				NoAmplification		lnuA-01	BAL_CASE04				NoAmplification		lnuA-01	BAL_CASE05				NoAmplification		lnuA-01	BAL_CASE06				NoAmplification		lnuA-01	BAL_CASE07	32.69	73.55	2			lnuA-01
lnuB-01	BAL_CASE01				NoAmplification		lnuB-01	BAL_CASE02				NoAmplification		lnuB-01	BAL_CASE03				NoAmplification		lnuB-01	BAL_CASE04				NoAmplification		lnuB-01	BAL_CASE05				NoAmplification		lnuB-01	BAL_CASE06				NoAmplification		lnuB-01	BAL_CASE07				NoAmplification		lnuB-01
lnuB-02	BAL_CASE01				NoAmplification		lnuB-02	BAL_CASE02				NoAmplification		lnuB-02	BAL_CASE03				NoAmplification		lnuB-02	BAL_CASE04				NoAmplification		lnuB-02	BAL_CASE05				NoAmplification		lnuB-02	BAL_CASE06				NoAmplification		lnuB-02	BAL_CASE07				NoAmplification		lnuB-02
lnuC	BAL_CASE01				NoAmplification		lnuC	BAL_CASE02				NoAmplification		lnuC	BAL_CASE03				NoAmplification		lnuC	BAL_CASE04				BadR2, LowEfficiency, CtIsSmall, SaturationBaselineRatioIsLow, CurveFitFailed, HighBaseline		lnuC	BAL_CASE05				NoAmplification		lnuC	BAL_CASE06				NoAmplification		lnuC	BAL_CASE07				CurveFitFailed		lnuC
marR-01	BAL_CASE01				NoAmplification		marR-01	BAL_CASE02	37.88	85.7	1.82			marR-01	BAL_CASE03	36.13	85.54	1.86			marR-01	BAL_CASE04				NoAmplification		marR-01	BAL_CASE05				NoAmplification		marR-01	BAL_CASE06	34.62	85.54	1.94			marR-01	BAL_CASE07				CurveFitFailed		marR-01
matA/mel	BAL_CASE01	26.04	77.03	1.98	MultipleMeltPeaks		matA/mel	BAL_CASE02	25.89	77.81	2.03			matA/mel	BAL_CASE03	23.07	77.84	2.04			matA/mel	BAL_CASE04	26.52	77.6	1.99			matA/mel	BAL_CASE05	25.56	77.66	2.01			matA/mel	BAL_CASE06	22.78	77.71	2.06			matA/mel	BAL_CASE07	25.66	77.66	2.03			matA/mel
mdetl1	BAL_CASE01				NoAmplification		mdetl1	BAL_CASE02				NoAmplification		mdetl1	BAL_CASE03				NoAmplification		mdetl1	BAL_CASE04				NoAmplification		mdetl1	BAL_CASE05				NoAmplification		mdetl1	BAL_CASE06				NoAmplification		mdetl1	BAL_CASE07				NoAmplification		mdetl1
mdtA	BAL_CASE01				NoAmplification		mdtA	BAL_CASE02	38.82	64.06	1.79	MultipleMeltPeaks		mdtA	BAL_CASE03				NoAmplification		mdtA	BAL_CASE04				NoAmplification		mdtA	BAL_CASE05				NoAmplification		mdtA	BAL_CASE06				NoAmplification		mdtA	BAL_CASE07				CurveFitFailed		mdtA
mdtE/yhiU	BAL_CASE01				NoAmplification		mdtE/yhiU	BAL_CASE02				NoAmplification		mdtE/yhiU	BAL_CASE03				NoAmplification		mdtE/yhiU	BAL_CASE04				NoAmplification		mdtE/yhiU	BAL_CASE05				NoAmplification		mdtE/yhiU	BAL_CASE06				NoAmplification		mdtE/yhiU	BAL_CASE07				NoAmplification		mdtE/yhiU
mecA	BAL_CASE01				NoAmplification		mecA	BAL_CASE02				NoAmplification		mecA	BAL_CASE03				NoAmplification		mecA	BAL_CASE04				NoAmplification		mecA	BAL_CASE05				NoAmplification		mecA	BAL_CASE06				NoAmplification		mecA	BAL_CASE07				NoAmplification		mecA
mefA	BAL_CASE01	25.59	80.49	1.85			mefA	BAL_CASE02	27.38	80.73	1.94			mefA	BAL_CASE03	22.44	80.77	1.97			mefA	BAL_CASE04	25.7	80.69	1.91			mefA	BAL_CASE05	24.98	80.75	1.94			mefA	BAL_CASE06	22.47	80.84	1.99			mefA	BAL_CASE07	25.45	80.7	1.97			mefA
mepA	BAL_CASE01	31.41	85.22	1.97			mepA	BAL_CASE02	35.5	78.66	1.9			mepA	BAL_CASE03	34.49	81.68	1.95	MultipleMeltPeaks		mepA	BAL_CASE04	34.5	87.11	1.85			mepA	BAL_CASE05	33.51	83.22	1.98			mepA	BAL_CASE06	35.52	81.7	1.91			mepA	BAL_CASE07				NoAmplification		mepA
mexA	BAL_CASE01				NoAmplification		mexA	BAL_CASE02				NoAmplification		mexA	BAL_CASE03				NoAmplification		mexA	BAL_CASE04				NoAmplification		mexA	BAL_CASE05				NoAmplification		mexA	BAL_CASE06				NoAmplification		mexA	BAL_CASE07				NoAmplification		mexA
mexD	BAL_CASE01				NoAmplification		mexD	BAL_CASE02	32.87	80.18	2.01			mexD	BAL_CASE03	38.72	79.82	1.77			mexD	BAL_CASE04	32.36	80.22	1.94			mexD	BAL_CASE05				CurveFitFailed		mexD	BAL_CASE06	35.68	79.82	1.95			mexD	BAL_CASE07				CurveFitFailed		mexD
mexE	BAL_CASE01	34.99	87.85	1.83			mexE	BAL_CASE02				NoAmplification		mexE	BAL_CASE03				CurveFitFailed		mexE	BAL_CASE04				NoAmplification		mexE	BAL_CASE05	36.44	83.56	1.8	MultipleMeltPeaks		mexE	BAL_CASE06	36.53	88.37	1.82			mexE	BAL_CASE07				NoAmplification		mexE
mexF	BAL_CASE01	27.94	84.31	2.04	MultipleMeltPeaks		mexF	BAL_CASE02	31.5	87.15	2.03	MultipleMeltPeaks		mexF	BAL_CASE03	27.51	87.71	1.9			mexF	BAL_CASE04	29.57	81.27	1.74			mexF	BAL_CASE05	28.31	84.81	1.77	MultipleMeltPeaks		mexF	BAL_CASE06	28.43	87.42	1.89	MultipleMeltPeaks		mexF	BAL_CASE07	31.93	81.13	1.92	MultipleMeltPeaks		mexF
mphA-01	BAL_CASE01	30.23	86.89	1.84	MultipleMeltPeaks		mphA-01	BAL_CASE02	35.25	86.98	1.89			mphA-01	BAL_CASE03	31.87	89.1	1.94			mphA-01	BAL_CASE04	31.78	86.86	1.78			mphA-01	BAL_CASE05	32	86.84	1.79	MultipleMeltPeaks		mphA-01	BAL_CASE06	31.56	89.14	2.01			mphA-01	BAL_CASE07	30.69	86.92	1.96	MultipleMeltPeaks		mphA-01
mphA-02	BAL_CASE01				CurveFitFailed		mphA-02	BAL_CASE02	33.64	86.75	1.93	MultipleMeltPeaks		mphA-02	BAL_CASE03	32.4	86.86	1.58			mphA-02	BAL_CASE04	29.79	89.45	1.52	MultipleMeltPeaks		mphA-02	BAL_CASE05	32.05	85.09	1.46	MultipleMeltPeaks		mphA-02	BAL_CASE06	32.64	82.79	1.58	MultipleMeltPeaks		mphA-02	BAL_CASE07	31.07	77.49	1.83			mphA-02
mphB	BAL_CASE01				NoAmplification		mphB	BAL_CASE02				NoAmplification		mphB	BAL_CASE03				NoAmplification		mphB	BAL_CASE04				NoAmplification		mphB	BAL_CASE05				NoAmplification		mphB	BAL_CASE06				NoAmplification		mphB	BAL_CASE07				NoAmplification		mphB
mphC	BAL_CASE01				NoAmplification		mphC	BAL_CASE02				NoAmplification		mphC	BAL_CASE03				NoAmplification		mphC	BAL_CASE04				NoAmplification		mphC	BAL_CASE05				NoAmplification		mphC	BAL_CASE06				NoAmplification		mphC	BAL_CASE07				NoAmplification		mphC
msrA-01	BAL_CASE01				NoAmplification		msrA-01	BAL_CASE02				NoAmplification		msrA-01	BAL_CASE03				NoAmplification		msrA-01	BAL_CASE04				NoAmplification		msrA-01	BAL_CASE05				NoAmplification		msrA-01	BAL_CASE06				NoAmplification		msrA-01	BAL_CASE07				NoAmplification		msrA-01
msrC-01	BAL_CASE01				NoAmplification		msrC-01	BAL_CASE02				NoAmplification		msrC-01	BAL_CASE03				NoAmplification		msrC-01	BAL_CASE04				NoAmplification		msrC-01	BAL_CASE05				NoAmplification		msrC-01	BAL_CASE06				NoAmplification		msrC-01	BAL_CASE07				NoAmplification		msrC-01
mtrC-01	BAL_CASE01				NoAmplification		mtrC-01	BAL_CASE02				NoAmplification		mtrC-01	BAL_CASE03				NoAmplification		mtrC-01	BAL_CASE04				NoAmplification		mtrC-01	BAL_CASE05				NoAmplification		mtrC-01	BAL_CASE06				NoAmplification		mtrC-01	BAL_CASE07				NoAmplification		mtrC-01
mtrC-02	BAL_CASE01	31.54	84.42	1.95			mtrC-02	BAL_CASE02	36.66	84.42	1.79			mtrC-02	BAL_CASE03	39.22	84.17	1.73	MultipleMeltPeaks		mtrC-02	BAL_CASE04				NoAmplification		mtrC-02	BAL_CASE05	32.76	84.45	1.94			mtrC-02	BAL_CASE06	31.88	84.35	1.94			mtrC-02	BAL_CASE07	37.39	84.29	1.79			mtrC-02
mtrD-02	BAL_CASE01	26.56	81.99	1.8			mtrD-02	BAL_CASE02	28.99	81.24	1.92	MultipleMeltPeaks		mtrD-02	BAL_CASE03	28.36	81.06	1.94	MultipleMeltPeaks		mtrD-02	BAL_CASE04	26.95	84.9	1.87			mtrD-02	BAL_CASE05	27.51	83.28	1.92	MultipleMeltPeaks		mtrD-02	BAL_CASE06	27.82	81.48	1.9			mtrD-02	BAL_CASE07	29.33	81.33	1.95			mtrD-02
mtrD-03	BAL_CASE01				NoAmplification		mtrD-03	BAL_CASE02				NoAmplification		mtrD-03	BAL_CASE03				NoAmplification		mtrD-03	BAL_CASE04				NoAmplification		mtrD-03	BAL_CASE05	30.79	79.91	1.78			mtrD-03	BAL_CASE06				NoAmplification		mtrD-03	BAL_CASE07				NoAmplification		mtrD-03
NDM1	BAL_CASE01				NoAmplification		NDM1	BAL_CASE02				NoAmplification		NDM1	BAL_CASE03				CurveFitFailed		NDM1	BAL_CASE04				NoAmplification		NDM1	BAL_CASE05				NoAmplification		NDM1	BAL_CASE06	34.81	80.29	1.98			NDM1	BAL_CASE07				NoAmplification		NDM1
nimE	BAL_CASE01				NoAmplification		nimE	BAL_CASE02				NoAmplification		nimE	BAL_CASE03	34.44	75.77	2.01			nimE	BAL_CASE04	33.13	85.06	1.91			nimE	BAL_CASE05				NoAmplification		nimE	BAL_CASE06	34.96	85.03	1.99			nimE	BAL_CASE07				CurveFitFailed		nimE
nisB	BAL_CASE01				NoAmplification		nisB	BAL_CASE02				NoAmplification		nisB	BAL_CASE03				NoAmplification		nisB	BAL_CASE04				NoAmplification		nisB	BAL_CASE05				NoAmplification		nisB	BAL_CASE06				NoAmplification		nisB	BAL_CASE07				NoAmplification		nisB
oleC	BAL_CASE01				NoAmplification		oleC	BAL_CASE02				NoAmplification		oleC	BAL_CASE03	39.31	81.29	1.75			oleC	BAL_CASE04	34.56	84.21	1.87			oleC	BAL_CASE05				NoAmplification		oleC	BAL_CASE06				NoAmplification		oleC	BAL_CASE07				NoAmplification		oleC
oprD	BAL_CASE01	27.96	86.78	1.94			oprD	BAL_CASE02	33.07	81.58	1.99			oprD	BAL_CASE03	32.17	81.74	1.98	MultipleMeltPeaks		oprD	BAL_CASE04	28.77	81.78	1.97			oprD	BAL_CASE05	28.96	86.76	1.98			oprD	BAL_CASE06	30.46	81.92	1.99			oprD	BAL_CASE07	32.29	85.86	1.94			oprD
oprJ	BAL_CASE01				NoAmplification		oprJ	BAL_CASE02	33.65	88.68	1.91			oprJ	BAL_CASE03	32.64	88.39	1.9			oprJ	BAL_CASE04				NoAmplification		oprJ	BAL_CASE05	32.74	89.6	1.89			oprJ	BAL_CASE06	35	86.13	1.78	MultipleMeltPeaks		oprJ	BAL_CASE07	33.77	81.4	1.93			oprJ
pbp	BAL_CASE01				NoAmplification		pbp	BAL_CASE02				NoAmplification		pbp	BAL_CASE03				NoAmplification		pbp	BAL_CASE04				NoAmplification		pbp	BAL_CASE05				NoAmplification		pbp	BAL_CASE06				NoAmplification		pbp	BAL_CASE07				NoAmplification		pbp
pbp2x	BAL_CASE01				NoAmplification		pbp2x	BAL_CASE02				NoAmplification		pbp2x	BAL_CASE03				NoAmplification		pbp2x	BAL_CASE04				NoAmplification		pbp2x	BAL_CASE05	27.62	75.81	1.82			pbp2x	BAL_CASE06				NoAmplification		pbp2x	BAL_CASE07	29.32	75.74	1.9			pbp2x
Pbp5	BAL_CASE01				NoAmplification		Pbp5	BAL_CASE02				NoAmplification		Pbp5	BAL_CASE03				NoAmplification		Pbp5	BAL_CASE04				NoAmplification		Pbp5	BAL_CASE05				NoAmplification		Pbp5	BAL_CASE06				NoAmplification		Pbp5	BAL_CASE07				NoAmplification		Pbp5
penA	BAL_CASE01				NoAmplification		penA	BAL_CASE02				NoAmplification		penA	BAL_CASE03				NoAmplification		penA	BAL_CASE04				NoAmplification		penA	BAL_CASE05				NoAmplification		penA	BAL_CASE06				NoAmplification		penA	BAL_CASE07				NoAmplification		penA
pikR1	BAL_CASE01				NoAmplification		pikR1	BAL_CASE02				NoAmplification		pikR1	BAL_CASE03				NoAmplification		pikR1	BAL_CASE04				NoAmplification		pikR1	BAL_CASE05				BadR2, CtIsSmall, SaturationBaselineRatioIsLow, CurveFitFailed, HighBaseline		pikR1	BAL_CASE06	39.04	89.02	1.62	MultipleMeltPeaks		pikR1	BAL_CASE07				NoAmplification		pikR1
pikR2	BAL_CASE01	28.51	85.08	2.06			pikR2	BAL_CASE02	32.03	84.69	2.01			pikR2	BAL_CASE03	30.92	85.7	2.02			pikR2	BAL_CASE04	29.84	85.73	1.92			pikR2	BAL_CASE05	29.91	85.74	2.02			pikR2	BAL_CASE06	33.2	84.64	1.84	MultipleMeltPeaks		pikR2	BAL_CASE07	34	84.61	1.88			pikR2
pmrA	BAL_CASE01	23.26	79.91	1.97			pmrA	BAL_CASE02	28.94	79.1	2.06			pmrA	BAL_CASE03	23.11	79.72	2.08			pmrA	BAL_CASE04	28.99	79.56	1.97			pmrA	BAL_CASE05	26.41	79.29	2.09			pmrA	BAL_CASE06	25.26	79	2.13			pmrA	BAL_CASE07	28.67	79.14	2.05			pmrA
pncA	BAL_CASE01				NoAmplification		pncA	BAL_CASE02	33.82	80.76	1.88	MultipleMeltPeaks		pncA	BAL_CASE03	37.77	74.89	1.94	MultipleMeltPeaks		pncA	BAL_CASE04	34.76	82.25	1.88			pncA	BAL_CASE05	34.28	89.04	1.91	MultipleMeltPeaks		pncA	BAL_CASE06	31.42	89.67	1.8			pncA	BAL_CASE07				NoAmplification		pncA
putative multidrug	BAL_CASE01				NoAmplification		putative multidrug	BAL_CASE02				NoAmplification		putative multidrug	BAL_CASE03	35.65	76.98	1.89	MultipleMeltPeaks		putative multidrug	BAL_CASE04	32.54	84.17	1.87			putative multidrug	BAL_CASE05	32.58	84.3	1.94			putative multidrug	BAL_CASE06	38.25	77.27	1.79	MultipleMeltPeaks		putative multidrug	BAL_CASE07				NoAmplification		putative multidrug
qac	BAL_CASE01				NoAmplification		qac	BAL_CASE02				NoAmplification		qac	BAL_CASE03				NoAmplification		qac	BAL_CASE04				NoAmplification		qac	BAL_CASE05				NoAmplification		qac	BAL_CASE06				NoAmplification		qac	BAL_CASE07				NoAmplification		qac
qacA	BAL_CASE01				NoAmplification		qacA	BAL_CASE02	41.58	70.53	1.56			qacA	BAL_CASE03				NoAmplification		qacA	BAL_CASE04				NoAmplification		qacA	BAL_CASE05				NoAmplification		qacA	BAL_CASE06	33.23	70.51	1.68			qacA	BAL_CASE07				NoAmplification		qacA
qacA/qacB	BAL_CASE01				NoAmplification		qacA/qacB	BAL_CASE02				NoAmplification		qacA/qacB	BAL_CASE03				CurveFitFailed		qacA/qacB	BAL_CASE04				NoAmplification		qacA/qacB	BAL_CASE05	34.64	83.47	1.92			qacA/qacB	BAL_CASE06				NoAmplification		qacA/qacB	BAL_CASE07				NoAmplification		qacA/qacB
qacEdelta1-01	BAL_CASE01				NoAmplification		qacEdelta1-01	BAL_CASE02				NoAmplification		qacEdelta1-01	BAL_CASE03				NoAmplification		qacEdelta1-01	BAL_CASE04				NoAmplification		qacEdelta1-01	BAL_CASE05				NoAmplification		qacEdelta1-01	BAL_CASE06				NoAmplification		qacEdelta1-01	BAL_CASE07				NoAmplification		qacEdelta1-01
qacEdelta1-02	BAL_CASE01				NoAmplification		qacEdelta1-02	BAL_CASE02	33.52	80.23	1.97			qacEdelta1-02	BAL_CASE03				NoAmplification		qacEdelta1-02	BAL_CASE04	29.58	78.51	1.9			qacEdelta1-02	BAL_CASE05	34.06	75.84	1.82			qacEdelta1-02	BAL_CASE06				NoAmplification		qacEdelta1-02	BAL_CASE07	29.65	76.79	1.95			qacEdelta1-02
qacH-01	BAL_CASE01	29.32	86.21	1.96	MultipleMeltPeaks		qacH-01	BAL_CASE02				CurveFitFailed		qacH-01	BAL_CASE03	34.98	86.65	1.9			qacH-01	BAL_CASE04	32.77	85.95	1.95			qacH-01	BAL_CASE05	33.09	86	1.96			qacH-01	BAL_CASE06	34.38	86.48	1.95	MultipleMeltPeaks		qacH-01	BAL_CASE07				NoAmplification		qacH-01
qacH-02	BAL_CASE01				NoAmplification		qacH-02	BAL_CASE02	39.66	84.09	1.59			qacH-02	BAL_CASE03	37.61	83.71	1.68			qacH-02	BAL_CASE04				NoAmplification		qacH-02	BAL_CASE05	35.57	88.93	1.76	MultipleMeltPeaks		qacH-02	BAL_CASE06	35.89	79.02	1.82	MultipleMeltPeaks		qacH-02	BAL_CASE07				NoAmplification		qacH-02
qnrA	BAL_CASE01				NoAmplification		qnrA	BAL_CASE02	37.87	73.25	1.86	MultipleMeltPeaks		qnrA	BAL_CASE03	36.51	84.22	1.82	MultipleMeltPeaks		qnrA	BAL_CASE04				NoAmplification		qnrA	BAL_CASE05				BadR2, CtIsSmall, SaturationBaselineRatioIsLow, CurveFitFailed, HighBaseline		qnrA	BAL_CASE06	36.04	77.15	1.94			qnrA	BAL_CASE07				NoAmplification		qnrA
rarD-02	BAL_CASE01				NoAmplification		rarD-02	BAL_CASE02				NoAmplification		rarD-02	BAL_CASE03				NoAmplification		rarD-02	BAL_CASE04				NoAmplification		rarD-02	BAL_CASE05				BadR2, CtIsSmall, SaturationBaselineRatioIsLow, CurveFitFailed, HighBaseline		rarD-02	BAL_CASE06	38.06	82.91	1.8			rarD-02	BAL_CASE07				NoAmplification		rarD-02
sat4	BAL_CASE01				NoAmplification		sat4	BAL_CASE02				NoAmplification		sat4	BAL_CASE03				NoAmplification		sat4	BAL_CASE04				NoAmplification		sat4	BAL_CASE05				NoAmplification		sat4	BAL_CASE06				NoAmplification		sat4	BAL_CASE07				NoAmplification		sat4
sdeB	BAL_CASE01				NoAmplification		sdeB	BAL_CASE02				NoAmplification		sdeB	BAL_CASE03				NoAmplification		sdeB	BAL_CASE04				NoAmplification		sdeB	BAL_CASE05				NoAmplification		sdeB	BAL_CASE06				NoAmplification		sdeB	BAL_CASE07				NoAmplification		sdeB
spcN-01	BAL_CASE01				NoAmplification		spcN-01	BAL_CASE02				NoAmplification		spcN-01	BAL_CASE03				NoAmplification		spcN-01	BAL_CASE04				NoAmplification		spcN-01	BAL_CASE05	32.8	88.26	1.91			spcN-01	BAL_CASE06				NoAmplification		spcN-01	BAL_CASE07				CurveFitFailed		spcN-01
speA	BAL_CASE01				NoAmplification		speA	BAL_CASE02				NoAmplification		speA	BAL_CASE03				NoAmplification		speA	BAL_CASE04				NoAmplification		speA	BAL_CASE05				NoAmplification		speA	BAL_CASE06				NoAmplification		speA	BAL_CASE07				NoAmplification		speA
str	BAL_CASE01				NoAmplification		str	BAL_CASE02				NoAmplification		str	BAL_CASE03				NoAmplification		str	BAL_CASE04				NoAmplification		str	BAL_CASE05				NoAmplification		str	BAL_CASE06				NoAmplification		str	BAL_CASE07				NoAmplification		str
strA	BAL_CASE01				NoAmplification		strA	BAL_CASE02				NoAmplification		strA	BAL_CASE03				NoAmplification		strA	BAL_CASE04				NoAmplification		strA	BAL_CASE05				NoAmplification		strA	BAL_CASE06				NoAmplification		strA	BAL_CASE07				NoAmplification		strA
strB	BAL_CASE01				NoAmplification		strB	BAL_CASE02				CurveFitFailed		strB	BAL_CASE03				NoAmplification		strB	BAL_CASE04	24.62	84.02	1.89			strB	BAL_CASE05				NoAmplification		strB	BAL_CASE06	39.01	80.62	1.78			strB	BAL_CASE07				NoAmplification		strB
sul1	BAL_CASE01				NoAmplification		sul1	BAL_CASE02				NoAmplification		sul1	BAL_CASE03				NoAmplification		sul1	BAL_CASE04				NoAmplification		sul1	BAL_CASE05				NoAmplification		sul1	BAL_CASE06				NoAmplification		sul1	BAL_CASE07				NoAmplification		sul1
sul2	BAL_CASE01	27.15	85.62	1.68			sul2	BAL_CASE02				NoAmplification		sul2	BAL_CASE03				NoAmplification		sul2	BAL_CASE04				NoAmplification		sul2	BAL_CASE05	24.86	85.81	1.65			sul2	BAL_CASE06				NoAmplification		sul2	BAL_CASE07				NoAmplification		sul2
sulA/folP-01	BAL_CASE01	22.24	81.51	1.87			sulA/folP-01	BAL_CASE02	26.61	81.02	1.99			sulA/folP-01	BAL_CASE03	21.38	81.25	1.97			sulA/folP-01	BAL_CASE04	27.35	81.11	1.94			sulA/folP-01	BAL_CASE05	25.65	80.48	1.96			sulA/folP-01	BAL_CASE06	24.15	80.63	1.99			sulA/folP-01	BAL_CASE07				NoAmplification		sulA/folP-01
sulA/folP-03	BAL_CASE01	22.59	83.61	1.81			sulA/folP-03	BAL_CASE02	27.35	83.67	1.94			sulA/folP-03	BAL_CASE03	22.39	83.46	1.97			sulA/folP-03	BAL_CASE04	26.78	83.05	1.9			sulA/folP-03	BAL_CASE05	25.17	83.71	1.94			sulA/folP-03	BAL_CASE06	24.16	83.52	1.99			sulA/folP-03	BAL_CASE07	26.28	83.59	1.95			sulA/folP-03
tet(32)	BAL_CASE01	27.79	81.16	1.84			tet(32)	BAL_CASE02				NoAmplification		tet(32)	BAL_CASE03	24.41	81.41	1.97			tet(32)	BAL_CASE04	28.83	81.03	1.88			tet(32)	BAL_CASE05	22.52	81.45	1.93			tet(32)	BAL_CASE06	23.38	81.39	1.96			tet(32)	BAL_CASE07				NoAmplification		tet(32)
tet(34)	BAL_CASE01	31.09	75.54	1.86			tet(34)	BAL_CASE02	27.94	76.03	1.98			tet(34)	BAL_CASE03	31.65	75.58	1.96			tet(34)	BAL_CASE04	33.35	75.03	1.89			tet(34)	BAL_CASE05	32.79	75.24	1.9			tet(34)	BAL_CASE06	30.97	75.59	1.94			tet(34)	BAL_CASE07	30.01	75.78	1.98			tet(34)
tet(35)	BAL_CASE01				NoAmplification		tet(35)	BAL_CASE02				NoAmplification		tet(35)	BAL_CASE03				NoAmplification		tet(35)	BAL_CASE04				NoAmplification		tet(35)	BAL_CASE05				NoAmplification		tet(35)	BAL_CASE06				NoAmplification		tet(35)	BAL_CASE07				NoAmplification		tet(35)
tet(36)-A	BAL_CASE01				NoAmplification		tet(36)-A	BAL_CASE02				NoAmplification		tet(36)-A	BAL_CASE03				NoAmplification		tet(36)-A	BAL_CASE04				NoAmplification		tet(36)-A	BAL_CASE05				NoAmplification		tet(36)-A	BAL_CASE06				NoAmplification		tet(36)-A	BAL_CASE07				NoAmplification		tet(36)-A
tet(36)-B	BAL_CASE01				NoAmplification		tet(36)-B	BAL_CASE02				NoAmplification		tet(36)-B	BAL_CASE03				NoAmplification		tet(36)-B	BAL_CASE04				NoAmplification		tet(36)-B	BAL_CASE05				NoAmplification		tet(36)-B	BAL_CASE06				NoAmplification		tet(36)-B	BAL_CASE07				NoAmplification		tet(36)-B
tet(37)	BAL_CASE01	26.05	76.25	1.86			tet(37)	BAL_CASE02	41.5	78.36	1.71			tet(37)	BAL_CASE03	24.07	76.5	1.96			tet(37)	BAL_CASE04	27.22	76.34	1.87			tet(37)	BAL_CASE05				NoAmplification		tet(37)	BAL_CASE06	31.29	76.38	1.92			tet(37)	BAL_CASE07	22.8	76.64	1.97			tet(37)
tetA-01	BAL_CASE01				CurveFitFailed		tetA-01	BAL_CASE02	36.12	85.07	1.85			tetA-01	BAL_CASE03				CurveFitFailed		tetA-01	BAL_CASE04	30.69	85.1	1.87			tetA-01	BAL_CASE05	31.87	85.18	1.91			tetA-01	BAL_CASE06				NoAmplification		tetA-01	BAL_CASE07	34.35	85.1	1.95			tetA-01
tetA-02	BAL_CASE01				NoAmplification		tetA-02	BAL_CASE02				NoAmplification		tetA-02	BAL_CASE03				NoAmplification		tetA-02	BAL_CASE04				NoAmplification		tetA-02	BAL_CASE05				NoAmplification		tetA-02	BAL_CASE06				NoAmplification		tetA-02	BAL_CASE07				NoAmplification		tetA-02
tetB-01	BAL_CASE01	28.46	86.23	1.82	MultipleMeltPeaks		tetB-01	BAL_CASE02	26.62	79.67	1.95			tetB-01	BAL_CASE03				NoAmplification		tetB-01	BAL_CASE04				NoAmplification		tetB-01	BAL_CASE05	26.99	88.67	1.88	MultipleMeltPeaks		tetB-01	BAL_CASE06	26.81	79.65	1.91			tetB-01	BAL_CASE07				NoAmplification		tetB-01
tetB-02	BAL_CASE01	26.13	79.54	1.93			tetB-02	BAL_CASE02	26.15	79.58	2			tetB-02	BAL_CASE03				NoAmplification		tetB-02	BAL_CASE04	28.15	79.14	1.85			tetB-02	BAL_CASE05	26.71	79.56	1.9			tetB-02	BAL_CASE06	25.99	79.55	1.96			tetB-02	BAL_CASE07				NoAmplification		tetB-02
tetC-01	BAL_CASE01	28.17	75	1.86			tetC-01	BAL_CASE02	26.37	75.2	1.94			tetC-01	BAL_CASE03				NoAmplification		tetC-01	BAL_CASE04				NoAmplification		tetC-01	BAL_CASE05	27.06	75.06	1.7			tetC-01	BAL_CASE06	25.77	75.07	1.83			tetC-01	BAL_CASE07				NoAmplification		tetC-01
tetC-02	BAL_CASE01	27.76	75.73	1.93			tetC-02	BAL_CASE02	25.69	75.95	2			tetC-02	BAL_CASE03				NoAmplification		tetC-02	BAL_CASE04				NoAmplification		tetC-02	BAL_CASE05	26.98	75.91	1.89			tetC-02	BAL_CASE06	25.85	75.93	1.94			tetC-02	BAL_CASE07				NoAmplification		tetC-02
tetD-01	BAL_CASE01				NoAmplification		tetD-01	BAL_CASE02				NoAmplification		tetD-01	BAL_CASE03				NoAmplification		tetD-01	BAL_CASE04				NoAmplification		tetD-01	BAL_CASE05				NoAmplification		tetD-01	BAL_CASE06				NoAmplification		tetD-01	BAL_CASE07				NoAmplification		tetD-01
tetD-02	BAL_CASE01				NoAmplification		tetD-02	BAL_CASE02	31.42	77.63	1.95			tetD-02	BAL_CASE03				NoAmplification		tetD-02	BAL_CASE04	28.77	77.88	1.85			tetD-02	BAL_CASE05	30.1	77.53	1.87			tetD-02	BAL_CASE06				NoAmplification		tetD-02	BAL_CASE07	30.72	77.81	1.93			tetD-02
tetE	BAL_CASE01				NoAmplification		tetE	BAL_CASE02				NoAmplification		tetE	BAL_CASE03				NoAmplification		tetE	BAL_CASE04				NoAmplification		tetE	BAL_CASE05				NoAmplification		tetE	BAL_CASE06				NoAmplification		tetE	BAL_CASE07				NoAmplification		tetE
tetG-01	BAL_CASE01				NoAmplification		tetG-01	BAL_CASE02				CurveFitFailed		tetG-01	BAL_CASE03				NoAmplification		tetG-01	BAL_CASE04				NoAmplification		tetG-01	BAL_CASE05				NoAmplification		tetG-01	BAL_CASE06	36.21	80.59	2	MultipleMeltPeaks		tetG-01	BAL_CASE07	39.75	82.65	1.69	MultipleMeltPeaks		tetG-01
tetG-02	BAL_CASE01				NoAmplification		tetG-02	BAL_CASE02				NoAmplification		tetG-02	BAL_CASE03				NoAmplification		tetG-02	BAL_CASE04				NoAmplification		tetG-02	BAL_CASE05				NoAmplification		tetG-02	BAL_CASE06				CurveFitFailed		tetG-02	BAL_CASE07				NoAmplification		tetG-02
tetH	BAL_CASE01				NoAmplification		tetH	BAL_CASE02				NoAmplification		tetH	BAL_CASE03				NoAmplification		tetH	BAL_CASE04				NoAmplification		tetH	BAL_CASE05				NoAmplification		tetH	BAL_CASE06				NoAmplification		tetH	BAL_CASE07				NoAmplification		tetH
tetJ	BAL_CASE01				NoAmplification		tetJ	BAL_CASE02				NoAmplification		tetJ	BAL_CASE03				NoAmplification		tetJ	BAL_CASE04				NoAmplification		tetJ	BAL_CASE05				NoAmplification		tetJ	BAL_CASE06				NoAmplification		tetJ	BAL_CASE07				NoAmplification		tetJ
tetK	BAL_CASE01				NoAmplification		tetK	BAL_CASE02				NoAmplification		tetK	BAL_CASE03				NoAmplification		tetK	BAL_CASE04				NoAmplification		tetK	BAL_CASE05				NoAmplification		tetK	BAL_CASE06				NoAmplification		tetK	BAL_CASE07	28.91	72.43	2.06			tetK
tetL-01	BAL_CASE01				NoAmplification		tetL-01	BAL_CASE02				NoAmplification		tetL-01	BAL_CASE03				NoAmplification		tetL-01	BAL_CASE04				NoAmplification		tetL-01	BAL_CASE05				NoAmplification		tetL-01	BAL_CASE06				NoAmplification		tetL-01	BAL_CASE07				NoAmplification		tetL-01
tetL-02	BAL_CASE01				NoAmplification		tetL-02	BAL_CASE02				NoAmplification		tetL-02	BAL_CASE03				NoAmplification		tetL-02	BAL_CASE04				NoAmplification		tetL-02	BAL_CASE05				NoAmplification		tetL-02	BAL_CASE06	34.3	78.12	1.89	MultipleMeltPeaks		tetL-02	BAL_CASE07				NoAmplification		tetL-02
tetM-01	BAL_CASE01	22.12	76.06	1.86			tetM-01	BAL_CASE02	24.96	76.03	2			tetM-01	BAL_CASE03	23.16	75.89	1.98			tetM-01	BAL_CASE04	24.63	75.71	1.95			tetM-01	BAL_CASE05	21.14	76.26	1.92			tetM-01	BAL_CASE06	21.13	76.04	2			tetM-01	BAL_CASE07	29.92	75.95	1.99			tetM-01
tetM-02	BAL_CASE01	21.9	77.48	1.91			tetM-02	BAL_CASE02	24.09	77.5	2.03			tetM-02	BAL_CASE03	23.29	77.42	1.99			tetM-02	BAL_CASE04	25.58	77.35	1.92			tetM-02	BAL_CASE05	20.73	77.72	1.99			tetM-02	BAL_CASE06	21.55	77.61	2.06			tetM-02	BAL_CASE07				NoAmplification		tetM-02
tetO-01	BAL_CASE01				NoAmplification		tetO-01	BAL_CASE02				NoAmplification		tetO-01	BAL_CASE03	27.57	76.66	1.97			tetO-01	BAL_CASE04	29.49	76.49	1.88			tetO-01	BAL_CASE05	29.36	76.62	1.91			tetO-01	BAL_CASE06	27.71	76.66	1.99			tetO-01	BAL_CASE07	26.99	76.72	1.98			tetO-01
tetPA	BAL_CASE01				NoAmplification		tetPA	BAL_CASE02				NoAmplification		tetPA	BAL_CASE03				NoAmplification		tetPA	BAL_CASE04				NoAmplification		tetPA	BAL_CASE05				NoAmplification		tetPA	BAL_CASE06				NoAmplification		tetPA	BAL_CASE07				NoAmplification		tetPA
tetPB-01	BAL_CASE01				NoAmplification		tetPB-01	BAL_CASE02				NoAmplification		tetPB-01	BAL_CASE03				NoAmplification		tetPB-01	BAL_CASE04				NoAmplification		tetPB-01	BAL_CASE05	36.74	83.42	1.79			tetPB-01	BAL_CASE06				CurveFitFailed		tetPB-01	BAL_CASE07				NoAmplification		tetPB-01
tetPB-02	BAL_CASE01	29.34	84.73	1.84			tetPB-02	BAL_CASE02	34.71	84.74	2.03			tetPB-02	BAL_CASE03	31.53	84.71	1.99			tetPB-02	BAL_CASE04	29.43	84.71	1.94			tetPB-02	BAL_CASE05	31.31	84.83	1.67	MultipleMeltPeaks		tetPB-02	BAL_CASE06	32.09	84.77	2.02			tetPB-02	BAL_CASE07				NoAmplification		tetPB-02
tetPB-03	BAL_CASE01				NoAmplification		tetPB-03	BAL_CASE02				NoAmplification		tetPB-03	BAL_CASE03				NoAmplification		tetPB-03	BAL_CASE04				NoAmplification		tetPB-03	BAL_CASE05				NoAmplification		tetPB-03	BAL_CASE06				NoAmplification		tetPB-03	BAL_CASE07				NoAmplification		tetPB-03
tetPB-05	BAL_CASE01				NoAmplification		tetPB-05	BAL_CASE02				NoAmplification		tetPB-05	BAL_CASE03				NoAmplification		tetPB-05	BAL_CASE04				NoAmplification		tetPB-05	BAL_CASE05				NoAmplification		tetPB-05	BAL_CASE06				NoAmplification		tetPB-05	BAL_CASE07				NoAmplification		tetPB-05
tetQ	BAL_CASE01	23.69	75.76	1.9			tetQ	BAL_CASE02	23.75	77.4	2.01			tetQ	BAL_CASE03	19.78	77.03	2.04			tetQ	BAL_CASE04	26.59	76.94	1.89			tetQ	BAL_CASE05	19.67	76.41	1.95			tetQ	BAL_CASE06	17.41	76.29	2.03			tetQ	BAL_CASE07				NoAmplification		tetQ
tetR-02	BAL_CASE01	30.61	89.06	1.76			tetR-02	BAL_CASE02	37.24	87.14	1.79			tetR-02	BAL_CASE03				CurveFitFailed		tetR-02	BAL_CASE04				NoAmplification		tetR-02	BAL_CASE05	33.98	87.68	1.83			tetR-02	BAL_CASE06				CurveFitFailed		tetR-02	BAL_CASE07				NoAmplification		tetR-02
tetR-03	BAL_CASE01	28.11	75.87	1.88			tetR-03	BAL_CASE02	28.21	76.23	1.98			tetR-03	BAL_CASE03	28.1	76.02	1.98			tetR-03	BAL_CASE04				NoAmplification		tetR-03	BAL_CASE05	28.44	76	1.89			tetR-03	BAL_CASE06	25.32	76.06	1.94			tetR-03	BAL_CASE07				NoAmplification		tetR-03
tetS	BAL_CASE01				NoAmplification		tetS	BAL_CASE02				NoAmplification		tetS	BAL_CASE03				NoAmplification		tetS	BAL_CASE04				NoAmplification		tetS	BAL_CASE05	33.84	77.37	1.81	MultipleMeltPeaks		tetS	BAL_CASE06				LowEfficiency, CurveFitFailed		tetS	BAL_CASE07				BadR2, CurveFitFailed, HighBaseline		tetS
tetT	BAL_CASE01				NoAmplification		tetT	BAL_CASE02				NoAmplification		tetT	BAL_CASE03	43.99	76.67	1.69			tetT	BAL_CASE04				NoAmplification		tetT	BAL_CASE05				NoAmplification		tetT	BAL_CASE06				NoAmplification		tetT	BAL_CASE07	30.2	73.54	2.09			tetT
tetU-01	BAL_CASE01				NoAmplification		tetU-01	BAL_CASE02				NoAmplification		tetU-01	BAL_CASE03				NoAmplification		tetU-01	BAL_CASE04				NoAmplification		tetU-01	BAL_CASE05				NoAmplification		tetU-01	BAL_CASE06				NoAmplification		tetU-01	BAL_CASE07				NoAmplification		tetU-01
tetV	BAL_CASE01				NoAmplification		tetV	BAL_CASE02				NoAmplification		tetV	BAL_CASE03				NoAmplification		tetV	BAL_CASE04				NoAmplification		tetV	BAL_CASE05				NoAmplification		tetV	BAL_CASE06				NoAmplification		tetV	BAL_CASE07				NoAmplification		tetV
tetW-01	BAL_CASE01				NoAmplification		tetW-01	BAL_CASE02	29.63	81.26	1.92			tetW-01	BAL_CASE03	24.33	81.25	1.98			tetW-01	BAL_CASE04	28.2	81.32	1.75			tetW-01	BAL_CASE05	23.91	81.67	1.88			tetW-01	BAL_CASE06	25.54	81.57	1.93			tetW-01	BAL_CASE07				NoAmplification		tetW-01
tetX	BAL_CASE01				NoAmplification		tetX	BAL_CASE02				NoAmplification		tetX	BAL_CASE03				NoAmplification		tetX	BAL_CASE04				NoAmplification		tetX	BAL_CASE05				NoAmplification		tetX	BAL_CASE06				NoAmplification		tetX	BAL_CASE07				NoAmplification		tetX
tnpA-01	BAL_CASE01				NoAmplification		tnpA-01	BAL_CASE02				NoAmplification		tnpA-01	BAL_CASE03				NoAmplification		tnpA-01	BAL_CASE04				NoAmplification		tnpA-01	BAL_CASE05				NoAmplification		tnpA-01	BAL_CASE06	30.85	83.55	1.92			tnpA-01	BAL_CASE07				NoAmplification		tnpA-01
tnpA-02	BAL_CASE01	31.73	88.69	1.79	MultipleMeltPeaks		tnpA-02	BAL_CASE02				NoAmplification		tnpA-02	BAL_CASE03				NoAmplification		tnpA-02	BAL_CASE04	25.09	85.02	1.7			tnpA-02	BAL_CASE05				NoAmplification		tnpA-02	BAL_CASE06				NoAmplification		tnpA-02	BAL_CASE07				NoAmplification		tnpA-02
tnpA-03	BAL_CASE01	29.84	77.64	1.96			tnpA-03	BAL_CASE02	35.66	74.31	2.08			tnpA-03	BAL_CASE03	32.79	75.39	2.13			tnpA-03	BAL_CASE04	33.62	74.85	2.01			tnpA-03	BAL_CASE05				NoAmplification		tnpA-03	BAL_CASE06	26.41	78.35	2.02			tnpA-03	BAL_CASE07	34.96	74.53	2.07			tnpA-03
tnpA-04	BAL_CASE01				NoAmplification		tnpA-04	BAL_CASE02				NoAmplification		tnpA-04	BAL_CASE03				NoAmplification		tnpA-04	BAL_CASE04				NoAmplification		tnpA-04	BAL_CASE05				NoAmplification		tnpA-04	BAL_CASE06	29.25	82.25	1.74			tnpA-04	BAL_CASE07				NoAmplification		tnpA-04
tnpA-05	BAL_CASE01				NoAmplification		tnpA-05	BAL_CASE02				NoAmplification		tnpA-05	BAL_CASE03	36.03	83.1	1.87			tnpA-05	BAL_CASE04				NoAmplification		tnpA-05	BAL_CASE05				NoAmplification		tnpA-05	BAL_CASE06				NoAmplification		tnpA-05	BAL_CASE07				NoAmplification		tnpA-05
tnpA-07	BAL_CASE01				NoAmplification		tnpA-07	BAL_CASE02				NoAmplification		tnpA-07	BAL_CASE03				NoAmplification		tnpA-07	BAL_CASE04				NoAmplification		tnpA-07	BAL_CASE05				NoAmplification		tnpA-07	BAL_CASE06				NoAmplification		tnpA-07	BAL_CASE07				NoAmplification		tnpA-07
tolC-01	BAL_CASE01				NoAmplification		tolC-01	BAL_CASE02				NoAmplification		tolC-01	BAL_CASE03				NoAmplification		tolC-01	BAL_CASE04				NoAmplification		tolC-01	BAL_CASE05				NoAmplification		tolC-01	BAL_CASE06				NoAmplification		tolC-01	BAL_CASE07				NoAmplification		tolC-01
tolC-02	BAL_CASE01	31.92	87.79	1.97	MultipleMeltPeaks		tolC-02	BAL_CASE02	33.24	83.72	1.99	MultipleMeltPeaks		tolC-02	BAL_CASE03	33.27	87.82	1.96	MultipleMeltPeaks		tolC-02	BAL_CASE04	31.07	87.9	1.94	MultipleMeltPeaks		tolC-02	BAL_CASE05	31.11	87.98	1.95			tolC-02	BAL_CASE06	31.63	88.06	1.95			tolC-02	BAL_CASE07	28.77	85.71	1.91	MultipleMeltPeaks		tolC-02
tolC-03	BAL_CASE01	30.91	85.96	1.91			tolC-03	BAL_CASE02	34.19	84.85	1.91			tolC-03	BAL_CASE03	33.11	85.82	1.95			tolC-03	BAL_CASE04	30.27	86.13	1.92			tolC-03	BAL_CASE05	30.99	85.9	1.9			tolC-03	BAL_CASE06	30.06	85.65	1.96	MultipleMeltPeaks		tolC-03	BAL_CASE07	35.33	85.86	1.85			tolC-03
Tp614	BAL_CASE01				NoAmplification		Tp614	BAL_CASE02	35.68	73.63	1.89			Tp614	BAL_CASE03				CurveFitFailed		Tp614	BAL_CASE04				NoAmplification		Tp614	BAL_CASE05				NoAmplification		Tp614	BAL_CASE06				NoAmplification		Tp614	BAL_CASE07	40.14	82.1	1.76			Tp614
ttgA	BAL_CASE01				NoAmplification		ttgA	BAL_CASE02				NoAmplification		ttgA	BAL_CASE03	38.06	87.46	1.79			ttgA	BAL_CASE04				NoAmplification		ttgA	BAL_CASE05				NoAmplification		ttgA	BAL_CASE06				NoAmplification		ttgA	BAL_CASE07				NoAmplification		ttgA
ttgB	BAL_CASE01				CurveFitFailed		ttgB	BAL_CASE02	35.82	79.47	1.82			ttgB	BAL_CASE03				NoAmplification		ttgB	BAL_CASE04				BadR2, CtIsSmall, SaturationBaselineRatioIsLow, CurveFitFailed, HighBaseline		ttgB	BAL_CASE05				NoAmplification		ttgB	BAL_CASE06	43.27	81.15	1.71	MultipleMeltPeaks		ttgB	BAL_CASE07	38.37	76.83	1.83	MultipleMeltPeaks		ttgB
vanA	BAL_CASE01				NoAmplification		vanA	BAL_CASE02				NoAmplification		vanA	BAL_CASE03				NoAmplification		vanA	BAL_CASE04				NoAmplification		vanA	BAL_CASE05				NoAmplification		vanA	BAL_CASE06				NoAmplification		vanA	BAL_CASE07				NoAmplification		vanA
vanB-01	BAL_CASE01				NoAmplification		vanB-01	BAL_CASE02	27.92	74.16	1.92			vanB-01	BAL_CASE03	28.3	73.9	1.77			vanB-01	BAL_CASE04				NoAmplification		vanB-01	BAL_CASE05	32.92	73.16	1.64			vanB-01	BAL_CASE06	29.6	73.63	1.73			vanB-01	BAL_CASE07	28.63	73.99	1.82			vanB-01
vanC-01	BAL_CASE01				NoAmplification		vanC-01	BAL_CASE02				NoAmplification		vanC-01	BAL_CASE03				NoAmplification		vanC-01	BAL_CASE04				NoAmplification		vanC-01	BAL_CASE05				NoAmplification		vanC-01	BAL_CASE06				NoAmplification		vanC-01	BAL_CASE07				NoAmplification		vanC-01
vanC-02	BAL_CASE01				NoAmplification		vanC-02	BAL_CASE02				NoAmplification		vanC-02	BAL_CASE03				NoAmplification		vanC-02	BAL_CASE04				NoAmplification		vanC-02	BAL_CASE05				NoAmplification		vanC-02	BAL_CASE06				NoAmplification		vanC-02	BAL_CASE07				NoAmplification		vanC-02
vanC-03	BAL_CASE01	26.54	85.82	1.73			vanC-03	BAL_CASE02	32.77	77.63	1.87			vanC-03	BAL_CASE03	33.66	86.23	1.93	MultipleMeltPeaks		vanC-03	BAL_CASE04	32.5	86.21	1.64			vanC-03	BAL_CASE05	33.07	80.42	1.61			vanC-03	BAL_CASE06	33.15	82.26	1.81	MultipleMeltPeaks		vanC-03	BAL_CASE07				NoAmplification		vanC-03
vanC1	BAL_CASE01	30.95	83.07	1.88			vanC1	BAL_CASE02				NoAmplification		vanC1	BAL_CASE03				NoAmplification		vanC1	BAL_CASE04				NoAmplification		vanC1	BAL_CASE05				NoAmplification		vanC1	BAL_CASE06				NoAmplification		vanC1	BAL_CASE07				NoAmplification		vanC1
vanC2/vanC3	BAL_CASE01				NoAmplification		vanC2/vanC3	BAL_CASE02	36.55	82.7	1.85			vanC2/vanC3	BAL_CASE03				NoAmplification		vanC2/vanC3	BAL_CASE04				NoAmplification		vanC2/vanC3	BAL_CASE05				NoAmplification		vanC2/vanC3	BAL_CASE06				LowEfficiency, CurveFitFailed		vanC2/vanC3	BAL_CASE07				NoAmplification		vanC2/vanC3
vanG	BAL_CASE01				NoAmplification		vanG	BAL_CASE02				NoAmplification		vanG	BAL_CASE03				NoAmplification		vanG	BAL_CASE04				NoAmplification		vanG	BAL_CASE05				NoAmplification		vanG	BAL_CASE06				NoAmplification		vanG	BAL_CASE07				NoAmplification		vanG
vanHB	BAL_CASE01	32.82	89.7	1.95			vanHB	BAL_CASE02				NoAmplification		vanHB	BAL_CASE03	37.2	86.01	1.81			vanHB	BAL_CASE04				NoAmplification		vanHB	BAL_CASE05	35	85.92	1.94	MultipleMeltPeaks		vanHB	BAL_CASE06				CurveFitFailed		vanHB	BAL_CASE07				NoAmplification		vanHB
vanHD	BAL_CASE01				NoAmplification		vanHD	BAL_CASE02				NoAmplification		vanHD	BAL_CASE03				NoAmplification		vanHD	BAL_CASE04				NoAmplification		vanHD	BAL_CASE05				NoAmplification		vanHD	BAL_CASE06				NoAmplification		vanHD	BAL_CASE07				CurveFitFailed		vanHD
vanRA-01	BAL_CASE01				NoAmplification		vanRA-01	BAL_CASE02				NoAmplification		vanRA-01	BAL_CASE03				NoAmplification		vanRA-01	BAL_CASE04				NoAmplification		vanRA-01	BAL_CASE05				NoAmplification		vanRA-01	BAL_CASE06				NoAmplification		vanRA-01	BAL_CASE07				NoAmplification		vanRA-01
vanRA-02	BAL_CASE01				NoAmplification		vanRA-02	BAL_CASE02				NoAmplification		vanRA-02	BAL_CASE03				NoAmplification		vanRA-02	BAL_CASE04				NoAmplification		vanRA-02	BAL_CASE05				NoAmplification		vanRA-02	BAL_CASE06				NoAmplification		vanRA-02	BAL_CASE07				NoAmplification		vanRA-02
vanRB	BAL_CASE01				NoAmplification		vanRB	BAL_CASE02	37.87	88.87	1.75			vanRB	BAL_CASE03				NoAmplification		vanRB	BAL_CASE04				NoAmplification		vanRB	BAL_CASE05				NoAmplification		vanRB	BAL_CASE06	32.81	85.61	1.75			vanRB	BAL_CASE07	32.57	85.6	1.79			vanRB
vanRC	BAL_CASE01				NoAmplification		vanRC	BAL_CASE02				NoAmplification		vanRC	BAL_CASE03				NoAmplification		vanRC	BAL_CASE04				NoAmplification		vanRC	BAL_CASE05				NoAmplification		vanRC	BAL_CASE06				NoAmplification		vanRC	BAL_CASE07				NoAmplification		vanRC
vanRC4	BAL_CASE01				NoAmplification		vanRC4	BAL_CASE02				NoAmplification		vanRC4	BAL_CASE03				NoAmplification		vanRC4	BAL_CASE04				NoAmplification		vanRC4	BAL_CASE05				NoAmplification		vanRC4	BAL_CASE06				NoAmplification		vanRC4	BAL_CASE07				NoAmplification		vanRC4
vanRD	BAL_CASE01				NoAmplification		vanRD	BAL_CASE02				NoAmplification		vanRD	BAL_CASE03				NoAmplification		vanRD	BAL_CASE04				NoAmplification		vanRD	BAL_CASE05				NoAmplification		vanRD	BAL_CASE06				NoAmplification		vanRD	BAL_CASE07				NoAmplification		vanRD
vanSA	BAL_CASE01				NoAmplification		vanSA	BAL_CASE02				NoAmplification		vanSA	BAL_CASE03				NoAmplification		vanSA	BAL_CASE04				NoAmplification		vanSA	BAL_CASE05				NoAmplification		vanSA	BAL_CASE06				NoAmplification		vanSA	BAL_CASE07				NoAmplification		vanSA
vanSB	BAL_CASE01				NoAmplification		vanSB	BAL_CASE02				NoAmplification		vanSB	BAL_CASE03				NoAmplification		vanSB	BAL_CASE04				NoAmplification		vanSB	BAL_CASE05				NoAmplification		vanSB	BAL_CASE06				NoAmplification		vanSB	BAL_CASE07				NoAmplification		vanSB
vanSC-01	BAL_CASE01				NoAmplification		vanSC-01	BAL_CASE02				NoAmplification		vanSC-01	BAL_CASE03				NoAmplification		vanSC-01	BAL_CASE04				NoAmplification		vanSC-01	BAL_CASE05				NoAmplification		vanSC-01	BAL_CASE06				NoAmplification		vanSC-01	BAL_CASE07				NoAmplification		vanSC-01
vanSC-02	BAL_CASE01				NoAmplification		vanSC-02	BAL_CASE02				NoAmplification		vanSC-02	BAL_CASE03				NoAmplification		vanSC-02	BAL_CASE04				NoAmplification		vanSC-02	BAL_CASE05				NoAmplification		vanSC-02	BAL_CASE06				NoAmplification		vanSC-02	BAL_CASE07				NoAmplification		vanSC-02
vanTC-01	BAL_CASE01				NoAmplification		vanTC-01	BAL_CASE02				NoAmplification		vanTC-01	BAL_CASE03				NoAmplification		vanTC-01	BAL_CASE04				NoAmplification		vanTC-01	BAL_CASE05				NoAmplification		vanTC-01	BAL_CASE06				NoAmplification		vanTC-01	BAL_CASE07				NoAmplification		vanTC-01
vanTC-02	BAL_CASE01				NoAmplification		vanTC-02	BAL_CASE02				NoAmplification		vanTC-02	BAL_CASE03				NoAmplification		vanTC-02	BAL_CASE04				NoAmplification		vanTC-02	BAL_CASE05				NoAmplification		vanTC-02	BAL_CASE06				NoAmplification		vanTC-02	BAL_CASE07				NoAmplification		vanTC-02
vanTE	BAL_CASE01				NoAmplification		vanTE	BAL_CASE02				NoAmplification		vanTE	BAL_CASE03				NoAmplification		vanTE	BAL_CASE04				NoAmplification		vanTE	BAL_CASE05				NoAmplification		vanTE	BAL_CASE06				NoAmplification		vanTE	BAL_CASE07				NoAmplification		vanTE
vanTG	BAL_CASE01				NoAmplification		vanTG	BAL_CASE02				NoAmplification		vanTG	BAL_CASE03				NoAmplification		vanTG	BAL_CASE04				NoAmplification		vanTG	BAL_CASE05				NoAmplification		vanTG	BAL_CASE06				NoAmplification		vanTG	BAL_CASE07				NoAmplification		vanTG
vanWB	BAL_CASE01				NoAmplification		vanWB	BAL_CASE02				NoAmplification		vanWB	BAL_CASE03				NoAmplification		vanWB	BAL_CASE04				NoAmplification		vanWB	BAL_CASE05				NoAmplification		vanWB	BAL_CASE06				NoAmplification		vanWB	BAL_CASE07				NoAmplification		vanWB
vanWG	BAL_CASE01				NoAmplification		vanWG	BAL_CASE02	32.63	74.71	1.97			vanWG	BAL_CASE03				NoAmplification		vanWG	BAL_CASE04				NoAmplification		vanWG	BAL_CASE05				BadR2, CtIsSmall, SaturationBaselineRatioIsLow, CurveFitFailed, HighBaseline		vanWG	BAL_CASE06	37.33	73.88	1.91			vanWG	BAL_CASE07				NoAmplification		vanWG
vanXA	BAL_CASE01				NoAmplification		vanXA	BAL_CASE02				NoAmplification		vanXA	BAL_CASE03				NoAmplification		vanXA	BAL_CASE04				NoAmplification		vanXA	BAL_CASE05				NoAmplification		vanXA	BAL_CASE06				NoAmplification		vanXA	BAL_CASE07				NoAmplification		vanXA
vanXB	BAL_CASE01				NoAmplification		vanXB	BAL_CASE02				NoAmplification		vanXB	BAL_CASE03				NoAmplification		vanXB	BAL_CASE04				NoAmplification		vanXB	BAL_CASE05				NoAmplification		vanXB	BAL_CASE06				NoAmplification		vanXB	BAL_CASE07				NoAmplification		vanXB
vanXD	BAL_CASE01				NoAmplification		vanXD	BAL_CASE02	32.67	74.39	1.87			vanXD	BAL_CASE03	32.22	74.62	1.86			vanXD	BAL_CASE04	33.55	74.46	1.87			vanXD	BAL_CASE05	33.15	74.72	1.85			vanXD	BAL_CASE06	33.39	74.64	1.91			vanXD	BAL_CASE07	31.8	74.89	1.87			vanXD
vanYB	BAL_CASE01				NoAmplification		vanYB	BAL_CASE02				NoAmplification		vanYB	BAL_CASE03				NoAmplification		vanYB	BAL_CASE04				NoAmplification		vanYB	BAL_CASE05				NoAmplification		vanYB	BAL_CASE06				NoAmplification		vanYB	BAL_CASE07				NoAmplification		vanYB
vanYD-01	BAL_CASE01				NoAmplification		vanYD-01	BAL_CASE02				CurveFitFailed		vanYD-01	BAL_CASE03	38.18	80.65	1.8			vanYD-01	BAL_CASE04				NoAmplification		vanYD-01	BAL_CASE05				NoAmplification		vanYD-01	BAL_CASE06	35.03	83.04	1.88			vanYD-01	BAL_CASE07				LowEfficiency, SaturationBaselineRatioIsLow, CurveFitFailed		vanYD-01
vanYD-02	BAL_CASE01				NoAmplification		vanYD-02	BAL_CASE02				NoAmplification		vanYD-02	BAL_CASE03				CurveFitFailed		vanYD-02	BAL_CASE04				NoAmplification		vanYD-02	BAL_CASE05				NoAmplification		vanYD-02	BAL_CASE06				NoAmplification		vanYD-02	BAL_CASE07				NoAmplification		vanYD-02
vatB-01	BAL_CASE01				NoAmplification		vatB-01	BAL_CASE02				NoAmplification		vatB-01	BAL_CASE03				NoAmplification		vatB-01	BAL_CASE04				NoAmplification		vatB-01	BAL_CASE05				NoAmplification		vatB-01	BAL_CASE06				NoAmplification		vatB-01	BAL_CASE07				NoAmplification		vatB-01
vatB-02	BAL_CASE01				NoAmplification		vatB-02	BAL_CASE02				NoAmplification		vatB-02	BAL_CASE03				NoAmplification		vatB-02	BAL_CASE04				NoAmplification		vatB-02	BAL_CASE05				NoAmplification		vatB-02	BAL_CASE06	35.62	80.9	1.88			vatB-02	BAL_CASE07				NoAmplification		vatB-02
vatC-01	BAL_CASE01	33.58	81.33	1.84			vatC-01	BAL_CASE02				NoAmplification		vatC-01	BAL_CASE03	37.92	75.86	1.84			vatC-01	BAL_CASE04	35.41	81.43	1.84			vatC-01	BAL_CASE05				NoAmplification		vatC-01	BAL_CASE06				NoAmplification		vatC-01	BAL_CASE07				NoAmplification		vatC-01
vatC-02	BAL_CASE01				NoAmplification		vatC-02	BAL_CASE02	36.19	87.01	1.81			vatC-02	BAL_CASE03	38.04	86.32	1.73			vatC-02	BAL_CASE04	32.24	86.82	1.9			vatC-02	BAL_CASE05	35.74	87.83	1.79			vatC-02	BAL_CASE06	32.94	86.36	1.88			vatC-02	BAL_CASE07				CurveFitFailed		vatC-02
vatE-01	BAL_CASE01				NoAmplification		vatE-01	BAL_CASE02	29.57	76.51	2.11			vatE-01	BAL_CASE03	29.01	76.91	2.11			vatE-01	BAL_CASE04	29.8	77	1.98			vatE-01	BAL_CASE05	30.03	77.33	2.02			vatE-01	BAL_CASE06	28.56	77.14	2.06			vatE-01	BAL_CASE07	28.46	76.51	2.09			vatE-01
vatE-02	BAL_CASE01				NoAmplification		vatE-02	BAL_CASE02				NoAmplification		vatE-02	BAL_CASE03				NoAmplification		vatE-02	BAL_CASE04				NoAmplification		vatE-02	BAL_CASE05				NoAmplification		vatE-02	BAL_CASE06				NoAmplification		vatE-02	BAL_CASE07				NoAmplification		vatE-02
vgaA-01	BAL_CASE01				NoAmplification		vgaA-01	BAL_CASE02				NoAmplification		vgaA-01	BAL_CASE03				NoAmplification		vgaA-01	BAL_CASE04				NoAmplification		vgaA-01	BAL_CASE05				NoAmplification		vgaA-01	BAL_CASE06				NoAmplification		vgaA-01	BAL_CASE07				NoAmplification		vgaA-01
vgaA-02	BAL_CASE01				NoAmplification		vgaA-02	BAL_CASE02	39.93	76.38	1.8			vgaA-02	BAL_CASE03				NoAmplification		vgaA-02	BAL_CASE04				NoAmplification		vgaA-02	BAL_CASE05				NoAmplification		vgaA-02	BAL_CASE06				NoAmplification		vgaA-02	BAL_CASE07				NoAmplification		vgaA-02
vgb-01	BAL_CASE01				NoAmplification		vgb-01	BAL_CASE02				NoAmplification		vgb-01	BAL_CASE03				NoAmplification		vgb-01	BAL_CASE04				BadR2, CtIsSmall, SaturationBaselineRatioIsLow, CurveFitFailed, HighBaseline		vgb-01	BAL_CASE05	34.99	84.98	1.77	MultipleMeltPeaks		vgb-01	BAL_CASE06	34.39	78.84	1.95			vgb-01	BAL_CASE07				NoAmplification		vgb-01
vgbB-01	BAL_CASE01				NoAmplification		vgbB-01	BAL_CASE02				NoAmplification		vgbB-01	BAL_CASE03				NoAmplification		vgbB-01	BAL_CASE04				NoAmplification		vgbB-01	BAL_CASE05	31.35	74.9	1.94			vgbB-01	BAL_CASE06				NoAmplification		vgbB-01	BAL_CASE07				NoAmplification		vgbB-01
vgbB-02	BAL_CASE01				NoAmplification		vgbB-02	BAL_CASE02				NoAmplification		vgbB-02	BAL_CASE03				NoAmplification		vgbB-02	BAL_CASE04				NoAmplification		vgbB-02	BAL_CASE05				NoAmplification		vgbB-02	BAL_CASE06				NoAmplification		vgbB-02	BAL_CASE07				NoAmplification		vgbB-02
yceE/mdtG-01	BAL_CASE01				NoAmplification		yceE/mdtG-01	BAL_CASE02				NoAmplification		yceE/mdtG-01	BAL_CASE03				NoAmplification		yceE/mdtG-01	BAL_CASE04				NoAmplification		yceE/mdtG-01	BAL_CASE05				NoAmplification		yceE/mdtG-01	BAL_CASE06				NoAmplification		yceE/mdtG-01	BAL_CASE07				NoAmplification		yceE/mdtG-01
yceE/mdtG-02	BAL_CASE01				NoAmplification		yceE/mdtG-02	BAL_CASE02				NoAmplification		yceE/mdtG-02	BAL_CASE03				NoAmplification		yceE/mdtG-02	BAL_CASE04				NoAmplification		yceE/mdtG-02	BAL_CASE05	36.42	81.14	1.85			yceE/mdtG-02	BAL_CASE06				NoAmplification		yceE/mdtG-02	BAL_CASE07				NoAmplification		yceE/mdtG-02
yceL/mdtH-01	BAL_CASE01	30.43	86.34	1.79	MultipleMeltPeaks		yceL/mdtH-01	BAL_CASE02				NoAmplification		yceL/mdtH-01	BAL_CASE03	37.07	88.61	1.8	MultipleMeltPeaks		yceL/mdtH-01	BAL_CASE04				NoAmplification		yceL/mdtH-01	BAL_CASE05	35.72	75.06	1.89	MultipleMeltPeaks		yceL/mdtH-01	BAL_CASE06	32.65	75.94	1.86			yceL/mdtH-01	BAL_CASE07				CurveFitFailed		yceL/mdtH-01
yceL/mdtH-02	BAL_CASE01				NoAmplification		yceL/mdtH-02	BAL_CASE02				NoAmplification		yceL/mdtH-02	BAL_CASE03				NoAmplification		yceL/mdtH-02	BAL_CASE04				NoAmplification		yceL/mdtH-02	BAL_CASE05				NoAmplification		yceL/mdtH-02	BAL_CASE06				NoAmplification		yceL/mdtH-02	BAL_CASE07				NoAmplification		yceL/mdtH-02
yceL/mdtH-03	BAL_CASE01				NoAmplification		yceL/mdtH-03	BAL_CASE02	35.59	89.04	1.88			yceL/mdtH-03	BAL_CASE03				NoAmplification		yceL/mdtH-03	BAL_CASE04				CurveFitFailed		yceL/mdtH-03	BAL_CASE05				NoAmplification		yceL/mdtH-03	BAL_CASE06				NoAmplification		yceL/mdtH-03	BAL_CASE07				NoAmplification		yceL/mdtH-03
yidY/mdtL-01	BAL_CASE01	31.25	85.82	2.01	MultipleMeltPeaks		yidY/mdtL-01	BAL_CASE02	29.2	82.34	1.97			yidY/mdtL-01	BAL_CASE03	31.2	82.38	1.99	MultipleMeltPeaks		yidY/mdtL-01	BAL_CASE04	31.21	83.37	1.96	MultipleMeltPeaks		yidY/mdtL-01	BAL_CASE05	31.19	84.52	1.97			yidY/mdtL-01	BAL_CASE06	30.66	88.68	1.93			yidY/mdtL-01	BAL_CASE07	34.54	85.52	1.94			yidY/mdtL-01
yidY/mdtL-02	BAL_CASE01				NoAmplification		yidY/mdtL-02	BAL_CASE02				CurveFitFailed		yidY/mdtL-02	BAL_CASE03				NoAmplification		yidY/mdtL-02	BAL_CASE04				NoAmplification		yidY/mdtL-02	BAL_CASE05				NoAmplification		yidY/mdtL-02	BAL_CASE06	34.83	75.4	1.97			yidY/mdtL-02	BAL_CASE07				NoAmplification		yidY/mdtL-02
[truncated: 53 more columns]
